# Supplementary material for: Impact of extreme drought and incentive programs on flooded agriculture and wetlands in California’s Central Valley
Source: PeerJ. 2018 Jun 29;6:e5147. doi: 10.7717/peerj.5147 (PMC6056266; doi:10.7717/peerj.5147)
Supplement: Supplemental Information 1 [file peerj-06-5147-s001.csv]

BASINS_ID	BASIN	MAJOR	AREA	PERIMETER
7	Butte	Sacramento	2386342535	358361.1192
2	Colusa	Sacramento	3783885881	513782.4606
3	American	Sacramento	2452618046	314822.9309
4	Sutter	Sacramento	972341030.8	219266.3695
6	Delta	Delta	6176745597	451236.7913
8	Suisun	Suisun	367971475.9	103331.6627
12	San Joaquin	San Joaquin	8096826269	576204.1835
11	Tulare	Tulare	9536478515	692370.3766
5	Yolo	Sacramento	1900813441	305336.5582
