# Supplementary material for: Impact of extreme drought and incentive programs on flooded agriculture and wetlands in California’s Central Valley
Source: PeerJ. 2018 Jun 29;6:e5147. doi: 10.7717/peerj.5147 (PMC6056266; doi:10.7717/peerj.5147)
Supplement: Supplemental Information 4 [file peerj-06-5147-s004.csv]

landcover	landcover	date	year	month	interval	mo	water.year	int	index	basin	dayofyear	precip.4wk	precip.2wk	n.flooded	n.sampled	n.total	prop.flooded	prop.sampled	yday	waterdate
0	Unsuitable	14-Jan	2014	Jan	1	7	2013	A	7	2	14	0	0	36099	309924	321715	0.116476943	0.963349549	197	1/15/2014
1	Grass/Pasture	14-Jan	2014	Jan	1	7	2013	A	7	2	14	0	0	2489	401570	428238	0.006198172	0.937726218	197	1/15/2014
3	Corn	14-Jan	2014	Jan	1	7	2013	A	7	2	14	0	0	156	49977	52739	0.003121436	0.947628889	197	1/15/2014
5	Field Crop	14-Jan	2014	Jan	1	7	2013	A	7	2	14	0	0	27151	319339	321165	0.0850225	0.994314449	197	1/15/2014
7	Grains	14-Jan	2014	Jan	1	7	2013	A	7	2	14	0	0	710	106333	108163	0.006677137	0.983081091	197	1/15/2014
11	Alfalfa	14-Jan	2014	Jan	1	7	2013	A	7	2	14	0	0	525	194124	200092	0.002704457	0.97017372	197	1/15/2014
12	Rice	14-Jan	2014	Jan	1	7	2013	A	7	2	14	0	0	185870	1066942	1066952	0.174208158	0.999990628	197	1/15/2014
13	Row Crop	14-Jan	2014	Jan	1	7	2013	A	7	2	14	0	0	38	54305	54305	0.000699751	1	197	1/15/2014
99	Suitable-unassigned	14-Jan	2014	Jan	1	7	2013	A	7	2	14	0	0	9516	187449	191340	0.050765808	0.979664472	197	1/15/2014
100	Vineyard/Orchard	14-Jan	2014	Jan	1	7	2013	A	7	2	14	0	0	5584	893489	934031	0.006249657	0.956594588	197	1/15/2014
0	Unsuitable	1-Jun	2001	Jun	6	12	2000	A	12	2	156.6666667	0	0	34803	318206	321715	0.109372545	0.989092831	339.6666667	6/6/2001
0	Unsuitable	1-Jun	2001	Jun	6	12	2000	B	12.5	2	170	0	0	32882	319685	321715	0.1028575	0.993690067	353	6/20/2001
1	Grass/Pasture	1-Jun	2001	Jun	6	12	2000	A	12	2	156.6666667	0	0	977	419647	428238	0.002328147	0.979938726	339.6666667	6/6/2001
1	Grass/Pasture	1-Jun	2001	Jun	6	12	2000	B	12.5	2	170	0	0	548	423939	428238	0.001292639	0.98996119	353	6/20/2001
3	Corn	1-Jun	2001	Jun	6	12	2000	A	12	2	156.6666667	0	0	1372	52035	52739	0.026366868	0.986651245	339.6666667	6/6/2001
3	Corn	1-Jun	2001	Jun	6	12	2000	B	12.5	2	170	0	0	1500	52695	52739	0.028465699	0.999165703	353	6/20/2001
5	Field Crop	1-Jun	2001	Jun	6	12	2000	A	12	2	156.6666667	0	0	20701	320711	321165	0.064547209	0.998586396	339.6666667	6/6/2001
5	Field Crop	1-Jun	2001	Jun	6	12	2000	B	12.5	2	170	0	0	15108	320946	321165	0.047073339	0.999318108	353	6/20/2001
7	Grains	1-Jun	2001	Jun	6	12	2000	A	12	2	156.6666667	0	0	2154	107456	108163	0.020045414	0.993463569	339.6666667	6/6/2001
7	Grains	1-Jun	2001	Jun	6	12	2000	B	12.5	2	170	0	0	1767	107631	108163	0.016417203	0.995081497	353	6/20/2001
11	Alfalfa	1-Jun	2001	Jun	6	12	2000	A	12	2	156.6666667	0	0	7059	199157	200092	0.035444398	0.99532715	339.6666667	6/6/2001
11	Alfalfa	1-Jun	2001	Jun	6	12	2000	B	12.5	2	170	0	0	6402	199791	200092	0.032043485	0.998495692	353	6/20/2001
12	Rice	1-Jun	2001	Jun	6	12	2000	A	12	2	156.6666667	0	0	293532	1066952	1066952	0.275112657	1	339.6666667	6/6/2001
12	Rice	1-Jun	2001	Jun	6	12	2000	B	12.5	2	170	0	0	39498	1066952	1066952	0.037019472	1	353	6/20/2001
13	Row Crop	1-Jun	2001	Jun	6	12	2000	A	12	2	156.6666667	0	0	1288	54305	54305	0.02371789	1	339.6666667	6/6/2001
13	Row Crop	1-Jun	2001	Jun	6	12	2000	B	12.5	2	170	0	0	1368	54305	54305	0.025191051	1	353	6/20/2001
99	Suitable-unassigned	1-Jun	2001	Jun	6	12	2000	A	12	2	156.6666667	0	0	8273	190030	191340	0.043535231	0.993153549	339.6666667	6/6/2001
99	Suitable-unassigned	1-Jun	2001	Jun	6	12	2000	B	12.5	2	170	0	0	5480	190604	191340	0.028750708	0.996153444	353	6/20/2001
100	Vineyard/Orchard	1-Jun	2001	Jun	6	12	2000	A	12	2	156.6666667	0	0	20022	923222	934031	0.021687092	0.988427579	339.6666667	6/6/2001
100	Vineyard/Orchard	1-Jun	2001	Jun	6	12	2000	B	12.5	2	170	0	0	15128	927720	934031	0.016306644	0.993243265	353	6/20/2001
0	Unsuitable	2-Jun	2002	Jun	6	12	2001	B	12.5	2	175.6666667	0	0	29282	314173	321715	0.093203426	0.97655689	358.6666667	6/25/2002
1	Grass/Pasture	2-Jun	2002	Jun	6	12	2001	B	12.5	2	175.6666667	0	0	676	406811	428238	0.001661705	0.949964739	358.6666667	6/25/2002
3	Corn	2-Jun	2002	Jun	6	12	2001	B	12.5	2	175.6666667	0	0	1159	50915	52739	0.022763429	0.965414589	358.6666667	6/25/2002
5	Field Crop	2-Jun	2002	Jun	6	12	2001	B	12.5	2	175.6666667	0	0	10737	320383	321165	0.033513014	0.997565115	358.6666667	6/25/2002
7	Grains	2-Jun	2002	Jun	6	12	2001	B	12.5	2	175.6666667	0	0	1031	106745	108163	0.009658532	0.986890157	358.6666667	6/25/2002
11	Alfalfa	2-Jun	2002	Jun	6	12	2001	B	12.5	2	175.6666667	0	0	2249	196884	200092	0.01142297	0.983967375	358.6666667	6/25/2002
12	Rice	2-Jun	2002	Jun	6	12	2001	B	12.5	2	175.6666667	0	0	36128	1066948	1066952	0.033861069	0.999996251	358.6666667	6/25/2002
13	Row Crop	2-Jun	2002	Jun	6	12	2001	B	12.5	2	175.6666667	0	0	380	54305	54305	0.006997514	1	358.6666667	6/25/2002
99	Suitable-unassigned	2-Jun	2002	Jun	6	12	2001	B	12.5	2	175.6666667	0	0	4176	188536	191340	0.022149616	0.985345458	358.6666667	6/25/2002
100	Vineyard/Orchard	2-Jun	2002	Jun	6	12	2001	B	12.5	2	175.6666667	0	0	10168	908488	934031	0.011192223	0.972652942	358.6666667	6/25/2002
0	Unsuitable	4-Jun	2004	Jun	6	12	2003	B	12.5	2	176.3333333	0	0	29322	314157	321715	0.093335498	0.976507157	359.3333333	6/25/2004
1	Grass/Pasture	4-Jun	2004	Jun	6	12	2003	B	12.5	2	176.3333333	0	0	624	406795	428238	0.001533942	0.949927377	359.3333333	6/25/2004
3	Corn	4-Jun	2004	Jun	6	12	2003	B	12.5	2	176.3333333	0	0	566	50913	52739	0.011117004	0.965376666	359.3333333	6/25/2004
5	Field Crop	4-Jun	2004	Jun	6	12	2003	B	12.5	2	176.3333333	0	0	9537	320379	321165	0.029767869	0.99755266	359.3333333	6/25/2004
7	Grains	4-Jun	2004	Jun	6	12	2003	B	12.5	2	176.3333333	0	0	1787	106742	108163	0.016741301	0.986862421	359.3333333	6/25/2004
11	Alfalfa	4-Jun	2004	Jun	6	12	2003	B	12.5	2	176.3333333	0	0	3500	196875	200092	0.017777778	0.983922396	359.3333333	6/25/2004
12	Rice	4-Jun	2004	Jun	6	12	2003	B	12.5	2	176.3333333	0	0	10808	1066948	1066952	0.010129828	0.999996251	359.3333333	6/25/2004
13	Row Crop	4-Jun	2004	Jun	6	12	2003	B	12.5	2	176.3333333	0	0	600	54305	54305	0.011048706	1	359.3333333	6/25/2004
99	Suitable-unassigned	4-Jun	2004	Jun	6	12	2003	B	12.5	2	176.3333333	0	0	4005	188529	191340	0.021243416	0.985308874	359.3333333	6/25/2004
100	Vineyard/Orchard	4-Jun	2004	Jun	6	12	2003	B	12.5	2	176.3333333	0	0	9116	908457	934031	0.010034597	0.972619752	359.3333333	6/25/2004
0	Unsuitable	6-Jun	2006	Jun	6	12	2005	B	12.5	2	170.6666667	0	0	44116	317984	321715	0.13873654	0.988402779	353.6666667	6/20/2006
1	Grass/Pasture	6-Jun	2006	Jun	6	12	2005	B	12.5	2	170.6666667	0	0	942	419046	428238	0.002247963	0.9785353	353.6666667	6/20/2006
3	Corn	6-Jun	2006	Jun	6	12	2005	B	12.5	2	170.6666667	0	0	2501	51980	52739	0.048114659	0.985608373	353.6666667	6/20/2006
5	Field Crop	6-Jun	2006	Jun	6	12	2005	B	12.5	2	170.6666667	0	0	23392	320680	321165	0.072944992	0.998489873	353.6666667	6/20/2006
7	Grains	6-Jun	2006	Jun	6	12	2005	B	12.5	2	170.6666667	0	0	3681	107439	108163	0.034261302	0.993306399	353.6666667	6/20/2006
11	Alfalfa	6-Jun	2006	Jun	6	12	2005	B	12.5	2	170.6666667	0	0	4660	199036	200092	0.02341285	0.994722428	353.6666667	6/20/2006
12	Rice	6-Jun	2006	Jun	6	12	2005	B	12.5	2	170.6666667	0	0	392246	1066948	1066952	0.367633662	0.999996251	353.6666667	6/20/2006
13	Row Crop	6-Jun	2006	Jun	6	12	2005	B	12.5	2	170.6666667	0	0	1596	54305	54305	0.029389559	1	353.6666667	6/20/2006
99	Suitable-unassigned	6-Jun	2006	Jun	6	12	2005	B	12.5	2	170.6666667	0	0	11713	189938	191340	0.061667491	0.992672729	353.6666667	6/20/2006
100	Vineyard/Orchard	6-Jun	2006	Jun	6	12	2005	B	12.5	2	170.6666667	0	0	15644	922492	934031	0.016958413	0.98764602	353.6666667	6/20/2006
0	Unsuitable	10-Jun	2010	Jun	6	12	2009	B	12.5	2	176.3333333	0	0	32732	315227	321715	0.103836283	0.979833082	359.3333333	6/26/2010
1	Grass/Pasture	10-Jun	2010	Jun	6	12	2009	B	12.5	2	176.3333333	0	0	813	410110	428238	0.001982395	0.957668399	359.3333333	6/26/2010
3	Corn	10-Jun	2010	Jun	6	12	2009	B	12.5	2	176.3333333	0	0	1171	51300	52739	0.022826511	0.972714689	359.3333333	6/26/2010
5	Field Crop	10-Jun	2010	Jun	6	12	2009	B	12.5	2	176.3333333	0	0	11627	320439	321165	0.036284597	0.99773948	359.3333333	6/26/2010
7	Grains	10-Jun	2010	Jun	6	12	2009	B	12.5	2	176.3333333	0	0	1351	106824	108163	0.012646971	0.987620536	359.3333333	6/26/2010
11	Alfalfa	10-Jun	2010	Jun	6	12	2009	B	12.5	2	176.3333333	0	0	1418	198098	200092	0.007158073	0.990034584	359.3333333	6/26/2010
12	Rice	10-Jun	2010	Jun	6	12	2009	B	12.5	2	176.3333333	0	0	171983	1066948	1066952	0.161191548	0.999996251	359.3333333	6/26/2010
13	Row Crop	10-Jun	2010	Jun	6	12	2009	B	12.5	2	176.3333333	0	0	833	54305	54305	0.015339287	1	359.3333333	6/26/2010
99	Suitable-unassigned	10-Jun	2010	Jun	6	12	2009	B	12.5	2	176.3333333	0	0	5249	188976	191340	0.027776014	0.98764503	359.3333333	6/26/2010
100	Vineyard/Orchard	10-Jun	2010	Jun	6	12	2009	B	12.5	2	176.3333333	0	0	9167	912487	934031	0.010046171	0.976934384	359.3333333	6/26/2010
0	Unsuitable	2-Jul	2002	Jul	7	1	2002	A	1	2	189	0	0	35033	180957	321715	0.193598479	0.562476105	7	7/9/2002
0	Unsuitable	2-Jul	2002	Jul	7	1	2002	B	1.5	2	202.3333333	0	0	35033	180957	321715	0.193598479	0.562476105	20.33333333	7/22/2002
1	Grass/Pasture	2-Jul	2002	Jul	7	1	2002	A	1	2	189	0	0	4013	280462	428238	0.014308534	0.654920862	7	7/9/2002
1	Grass/Pasture	2-Jul	2002	Jul	7	1	2002	B	1.5	2	202.3333333	0	0	4013	280462	428238	0.014308534	0.654920862	20.33333333	7/22/2002
3	Corn	2-Jul	2002	Jul	7	1	2002	A	1	2	189	0	0	2310	21215	52739	0.108885223	0.402263979	7	7/9/2002
3	Corn	2-Jul	2002	Jul	7	1	2002	B	1.5	2	202.3333333	0	0	2310	21215	52739	0.108885223	0.402263979	20.33333333	7/22/2002
5	Field Crop	2-Jul	2002	Jul	7	1	2002	A	1	2	189	0	0	30668	195750	321165	0.156669221	0.60949979	7	7/9/2002
5	Field Crop	2-Jul	2002	Jul	7	1	2002	B	1.5	2	202.3333333	0	0	30668	195750	321165	0.156669221	0.60949979	20.33333333	7/22/2002
7	Grains	2-Jul	2002	Jul	7	1	2002	A	1	2	189	0	0	8938	69280	108163	0.129012702	0.640514779	7	7/9/2002
7	Grains	2-Jul	2002	Jul	7	1	2002	B	1.5	2	202.3333333	0	0	8938	69280	108163	0.129012702	0.640514779	20.33333333	7/22/2002
11	Alfalfa	2-Jul	2002	Jul	7	1	2002	A	1	2	189	0	0	15548	114653	200092	0.135609186	0.573001419	7	7/9/2002
11	Alfalfa	2-Jul	2002	Jul	7	1	2002	B	1.5	2	202.3333333	0	0	15548	114653	200092	0.135609186	0.573001419	20.33333333	7/22/2002
12	Rice	2-Jul	2002	Jul	7	1	2002	A	1	2	189	0	0	185525	707058	1066952	0.262390073	0.662689606	7	7/9/2002
12	Rice	2-Jul	2002	Jul	7	1	2002	B	1.5	2	202.3333333	0	0	185525	707058	1066952	0.262390073	0.662689606	20.33333333	7/22/2002
13	Row Crop	2-Jul	2002	Jul	7	1	2002	A	1	2	189	0	0	8759	43597	54305	0.200908319	0.80281742	7	7/9/2002
13	Row Crop	2-Jul	2002	Jul	7	1	2002	B	1.5	2	202.3333333	0	0	8759	43597	54305	0.200908319	0.80281742	20.33333333	7/22/2002
99	Suitable-unassigned	2-Jul	2002	Jul	7	1	2002	A	1	2	189	0	0	18781	124539	191340	0.150804166	0.650878018	7	7/9/2002
99	Suitable-unassigned	2-Jul	2002	Jul	7	1	2002	B	1.5	2	202.3333333	0	0	18781	124539	191340	0.150804166	0.650878018	20.33333333	7/22/2002
100	Vineyard/Orchard	2-Jul	2002	Jul	7	1	2002	A	1	2	189	0	0	30501	523418	934031	0.058272738	0.560386111	7	7/9/2002
100	Vineyard/Orchard	2-Jul	2002	Jul	7	1	2002	B	1.5	2	202.3333333	0	0	30501	523418	934031	0.058272738	0.560386111	20.33333333	7/22/2002
0	Unsuitable	3-Jul	2003	Jul	7	1	2003	A	1	2	189.3333333	0	0	31939	321715	321715	0.099277311	1	7.333333333	7/9/2003
1	Grass/Pasture	3-Jul	2003	Jul	7	1	2003	A	1	2	189.3333333	0	0	603	428238	428238	0.001408095	1	7.333333333	7/9/2003
3	Corn	3-Jul	2003	Jul	7	1	2003	A	1	2	189.3333333	0	0	1856	52739	52739	0.035192173	1	7.333333333	7/9/2003
5	Field Crop	3-Jul	2003	Jul	7	1	2003	A	1	2	189.3333333	0	0	12751	321165	321165	0.039702334	1	7.333333333	7/9/2003
7	Grains	3-Jul	2003	Jul	7	1	2003	A	1	2	189.3333333	0	0	1451	108163	108163	0.013414939	1	7.333333333	7/9/2003
11	Alfalfa	3-Jul	2003	Jul	7	1	2003	A	1	2	189.3333333	0	0	3706	200092	200092	0.01852148	1	7.333333333	7/9/2003
12	Rice	3-Jul	2003	Jul	7	1	2003	A	1	2	189.3333333	0	0	9834	1066952	1066952	0.009216909	1	7.333333333	7/9/2003
13	Row Crop	3-Jul	2003	Jul	7	1	2003	A	1	2	189.3333333	0	0	906	54305	54305	0.016683547	1	7.333333333	7/9/2003
99	Suitable-unassigned	3-Jul	2003	Jul	7	1	2003	A	1	2	189.3333333	0	0	3865	191340	191340	0.020199645	1	7.333333333	7/9/2003
100	Vineyard/Orchard	3-Jul	2003	Jul	7	1	2003	A	1	2	189.3333333	0	0	15835	934031	934031	0.016953399	1	7.333333333	7/9/2003
0	Unsuitable	4-Jul	2004	Jul	7	1	2004	A	1	2	192.3333333	0	0	31584	321715	321715	0.09817385	1	9.333333333	7/11/2004
1	Grass/Pasture	4-Jul	2004	Jul	7	1	2004	A	1	2	192.3333333	0	0	687	428238	428238	0.001604248	1	9.333333333	7/11/2004
3	Corn	4-Jul	2004	Jul	7	1	2004	A	1	2	192.3333333	0	0	909	52739	52739	0.017235822	1	9.333333333	7/11/2004
5	Field Crop	4-Jul	2004	Jul	7	1	2004	A	1	2	192.3333333	0	0	10340	321165	321165	0.032195289	1	9.333333333	7/11/2004
7	Grains	4-Jul	2004	Jul	7	1	2004	A	1	2	192.3333333	0	0	1008	108163	108163	0.009319268	1	9.333333333	7/11/2004
11	Alfalfa	4-Jul	2004	Jul	7	1	2004	A	1	2	192.3333333	0	0	3003	200092	200092	0.015008096	1	9.333333333	7/11/2004
12	Rice	4-Jul	2004	Jul	7	1	2004	A	1	2	192.3333333	0	0	5108	1066952	1066952	0.004787469	1	9.333333333	7/11/2004
13	Row Crop	4-Jul	2004	Jul	7	1	2004	A	1	2	192.3333333	0	0	426	54305	54305	0.007844582	1	9.333333333	7/11/2004
99	Suitable-unassigned	4-Jul	2004	Jul	7	1	2004	A	1	2	192.3333333	0	0	2952	191340	191340	0.015428034	1	9.333333333	7/11/2004
100	Vineyard/Orchard	4-Jul	2004	Jul	7	1	2004	A	1	2	192.3333333	0	0	11790	934031	934031	0.012622707	1	9.333333333	7/11/2004
0	Unsuitable	5-Jul	2005	Jul	7	1	2005	B	1.5	2	205	0	0	29608	321715	321715	0.092031767	1	23	7/25/2005
1	Grass/Pasture	5-Jul	2005	Jul	7	1	2005	B	1.5	2	205	0	0	582	428238	428238	0.001359057	1	23	7/25/2005
3	Corn	5-Jul	2005	Jul	7	1	2005	B	1.5	2	205	0	0	437	52739	52739	0.008286088	1	23	7/25/2005
5	Field Crop	5-Jul	2005	Jul	7	1	2005	B	1.5	2	205	0	0	7963	321165	321165	0.024794109	1	23	7/25/2005
7	Grains	5-Jul	2005	Jul	7	1	2005	B	1.5	2	205	0	0	626	108163	108163	0.005787561	1	23	7/25/2005
11	Alfalfa	5-Jul	2005	Jul	7	1	2005	B	1.5	2	205	0	0	2046	200092	200092	0.010225296	1	23	7/25/2005
12	Rice	5-Jul	2005	Jul	7	1	2005	B	1.5	2	205	0	0	5973	1066952	1066952	0.00559819	1	23	7/25/2005
13	Row Crop	5-Jul	2005	Jul	7	1	2005	B	1.5	2	205	0	0	241	54305	54305	0.004437897	1	23	7/25/2005
99	Suitable-unassigned	5-Jul	2005	Jul	7	1	2005	B	1.5	2	205	0	0	2523	191340	191340	0.013185952	1	23	7/25/2005
100	Vineyard/Orchard	5-Jul	2005	Jul	7	1	2005	B	1.5	2	205	0	0	9543	934031	934031	0.010217006	1	23	7/25/2005
0	Unsuitable	6-Jul	2006	Jul	7	1	2006	B	1.5	2	202.6666667	0	0	33023	321715	321715	0.102646753	1	20.66666667	7/22/2006
1	Grass/Pasture	6-Jul	2006	Jul	7	1	2006	B	1.5	2	202.6666667	0	0	458	428238	428238	0.001069499	1	20.66666667	7/22/2006
3	Corn	6-Jul	2006	Jul	7	1	2006	B	1.5	2	202.6666667	0	0	792	52739	52739	0.01501735	1	20.66666667	7/22/2006
5	Field Crop	6-Jul	2006	Jul	7	1	2006	B	1.5	2	202.6666667	0	0	10926	321165	321165	0.034019896	1	20.66666667	7/22/2006
7	Grains	6-Jul	2006	Jul	7	1	2006	B	1.5	2	202.6666667	0	0	1049	108163	108163	0.009698326	1	20.66666667	7/22/2006
11	Alfalfa	6-Jul	2006	Jul	7	1	2006	B	1.5	2	202.6666667	0	0	1978	200092	200092	0.009885453	1	20.66666667	7/22/2006
12	Rice	6-Jul	2006	Jul	7	1	2006	B	1.5	2	202.6666667	0	0	7581	1066952	1066952	0.007105287	1	20.66666667	7/22/2006
13	Row Crop	6-Jul	2006	Jul	7	1	2006	B	1.5	2	202.6666667	0	0	515	54305	54305	0.009483473	1	20.66666667	7/22/2006
99	Suitable-unassigned	6-Jul	2006	Jul	7	1	2006	B	1.5	2	202.6666667	0	0	3230	191340	191340	0.016880945	1	20.66666667	7/22/2006
100	Vineyard/Orchard	6-Jul	2006	Jul	7	1	2006	B	1.5	2	202.6666667	0	0	14068	934031	934031	0.015061599	1	20.66666667	7/22/2006
0	Unsuitable	7-Jul	2007	Jul	7	1	2007	A	1	2	189.6666667	0	0	34037	321715	321715	0.105798611	1	7.666666667	7/9/2007
0	Unsuitable	7-Jul	2007	Jul	7	1	2007	B	1.5	2	205.6666667	0	0	35645	321715	321715	0.110796823	1	23.66666667	7/25/2007
1	Grass/Pasture	7-Jul	2007	Jul	7	1	2007	A	1	2	189.6666667	0	0	516	428238	428238	0.001204937	1	7.666666667	7/9/2007
1	Grass/Pasture	7-Jul	2007	Jul	7	1	2007	B	1.5	2	205.6666667	0	0	472	428238	428238	0.001102191	1	23.66666667	7/25/2007
3	Corn	7-Jul	2007	Jul	7	1	2007	A	1	2	189.6666667	0	0	375	52739	52739	0.007110487	1	7.666666667	7/9/2007
3	Corn	7-Jul	2007	Jul	7	1	2007	B	1.5	2	205.6666667	0	0	173	52739	52739	0.003280305	1	23.66666667	7/25/2007
5	Field Crop	7-Jul	2007	Jul	7	1	2007	A	1	2	189.6666667	0	0	11377	321165	321165	0.035424159	1	7.666666667	7/9/2007
5	Field Crop	7-Jul	2007	Jul	7	1	2007	B	1.5	2	205.6666667	0	0	13342	321165	321165	0.041542509	1	23.66666667	7/25/2007
7	Grains	7-Jul	2007	Jul	7	1	2007	A	1	2	189.6666667	0	0	1866	108163	108163	0.01725174	1	7.666666667	7/9/2007
7	Grains	7-Jul	2007	Jul	7	1	2007	B	1.5	2	205.6666667	0	0	924	108163	108163	0.008542662	1	23.66666667	7/25/2007
11	Alfalfa	7-Jul	2007	Jul	7	1	2007	A	1	2	189.6666667	0	0	1800	200092	200092	0.008995862	1	7.666666667	7/9/2007
11	Alfalfa	7-Jul	2007	Jul	7	1	2007	B	1.5	2	205.6666667	0	0	1890	200092	200092	0.009445655	1	23.66666667	7/25/2007
12	Rice	7-Jul	2007	Jul	7	1	2007	A	1	2	189.6666667	0	0	9365	1066952	1066952	0.00877734	1	7.666666667	7/9/2007
12	Rice	7-Jul	2007	Jul	7	1	2007	B	1.5	2	205.6666667	0	0	7629	1066952	1066952	0.007150275	1	23.66666667	7/25/2007
13	Row Crop	7-Jul	2007	Jul	7	1	2007	A	1	2	189.6666667	0	0	672	54305	54305	0.012374551	1	7.666666667	7/9/2007
13	Row Crop	7-Jul	2007	Jul	7	1	2007	B	1.5	2	205.6666667	0	0	552	54305	54305	0.01016481	1	23.66666667	7/25/2007
99	Suitable-unassigned	7-Jul	2007	Jul	7	1	2007	A	1	2	189.6666667	0	0	3474	191340	191340	0.018156162	1	7.666666667	7/9/2007
99	Suitable-unassigned	7-Jul	2007	Jul	7	1	2007	B	1.5	2	205.6666667	0	0	3318	191340	191340	0.017340859	1	23.66666667	7/25/2007
100	Vineyard/Orchard	7-Jul	2007	Jul	7	1	2007	A	1	2	189.6666667	0	0	11794	934031	934031	0.01262699	1	7.666666667	7/9/2007
100	Vineyard/Orchard	7-Jul	2007	Jul	7	1	2007	B	1.5	2	205.6666667	0	0	12454	934031	934031	0.013333605	1	23.66666667	7/25/2007
0	Unsuitable	8-Jul	2008	Jul	7	1	2008	A	1	2	190	0	0	32664	309924	321715	0.10539358	0.963349549	7	7/9/2008
0	Unsuitable	8-Jul	2008	Jul	7	1	2008	B	1.5	2	203.3333333	0	0	19113	321715	321715	0.059409726	1	20.33333333	7/22/2008
1	Grass/Pasture	8-Jul	2008	Jul	7	1	2008	A	1	2	190	0	0	1196	401757	428238	0.002976924	0.938162891	7	7/9/2008
1	Grass/Pasture	8-Jul	2008	Jul	7	1	2008	B	1.5	2	203.3333333	0	0	106	428238	428238	0.000247526	1	20.33333333	7/22/2008
3	Corn	8-Jul	2008	Jul	7	1	2008	A	1	2	190	0	0	535	49977	52739	0.010704924	0.947628889	7	7/9/2008
3	Corn	8-Jul	2008	Jul	7	1	2008	B	1.5	2	203.3333333	0	0	38	52739	52739	0.000720529	1	20.33333333	7/22/2008
5	Field Crop	8-Jul	2008	Jul	7	1	2008	A	1	2	190	0	0	11254	319339	321165	0.035241546	0.994314449	7	7/9/2008
5	Field Crop	8-Jul	2008	Jul	7	1	2008	B	1.5	2	203.3333333	0	0	4902	321165	321165	0.015263182	1	20.33333333	7/22/2008
7	Grains	8-Jul	2008	Jul	7	1	2008	A	1	2	190	0	0	2637	106342	108163	0.024797352	0.983164298	7	7/9/2008
7	Grains	8-Jul	2008	Jul	7	1	2008	B	1.5	2	203.3333333	0	0	1013	108163	108163	0.009365495	1	20.33333333	7/22/2008
11	Alfalfa	8-Jul	2008	Jul	7	1	2008	A	1	2	190	0	0	2981	194124	200092	0.015356164	0.97017372	7	7/9/2008
11	Alfalfa	8-Jul	2008	Jul	7	1	2008	B	1.5	2	203.3333333	0	0	1078	200092	200092	0.005387522	1	20.33333333	7/22/2008
12	Rice	8-Jul	2008	Jul	7	1	2008	A	1	2	190	0	0	9773	1066942	1066952	0.009159823	0.999990628	7	7/9/2008
12	Rice	8-Jul	2008	Jul	7	1	2008	B	1.5	2	203.3333333	0	0	1989	1066952	1066952	0.001864189	1	20.33333333	7/22/2008
13	Row Crop	8-Jul	2008	Jul	7	1	2008	A	1	2	190	0	0	1048	54305	54305	0.019298407	1	7	7/9/2008
13	Row Crop	8-Jul	2008	Jul	7	1	2008	B	1.5	2	203.3333333	0	0	634	54305	54305	0.0116748	1	20.33333333	7/22/2008
99	Suitable-unassigned	8-Jul	2008	Jul	7	1	2008	A	1	2	190	0	0	3955	187461	191340	0.021097722	0.979727187	7	7/9/2008
99	Suitable-unassigned	8-Jul	2008	Jul	7	1	2008	B	1.5	2	203.3333333	0	0	1665	191340	191340	0.008701787	1	20.33333333	7/22/2008
100	Vineyard/Orchard	8-Jul	2008	Jul	7	1	2008	A	1	2	190	0	0	15038	893493	934031	0.016830574	0.956598871	7	7/9/2008
100	Vineyard/Orchard	8-Jul	2008	Jul	7	1	2008	B	1.5	2	203.3333333	0	0	3684	934031	934031	0.003944195	1	20.33333333	7/22/2008
0	Unsuitable	9-Jul	2009	Jul	7	1	2009	A	1	2	189.3333333	0	0	30122	321715	321715	0.093629455	1	7.333333333	7/9/2009
0	Unsuitable	9-Jul	2009	Jul	7	1	2009	B	1.5	2	205.3333333	0	0	29611	321715	321715	0.092041092	1	23.33333333	7/25/2009
1	Grass/Pasture	9-Jul	2009	Jul	7	1	2009	A	1	2	189.3333333	0	0	650	428238	428238	0.001517848	1	7.333333333	7/9/2009
1	Grass/Pasture	9-Jul	2009	Jul	7	1	2009	B	1.5	2	205.3333333	0	0	374	428238	428238	0.000873346	1	23.33333333	7/25/2009
3	Corn	9-Jul	2009	Jul	7	1	2009	A	1	2	189.3333333	0	0	833	52739	52739	0.015794763	1	7.333333333	7/9/2009
3	Corn	9-Jul	2009	Jul	7	1	2009	B	1.5	2	205.3333333	0	0	168	52739	52739	0.003185498	1	23.33333333	7/25/2009
5	Field Crop	9-Jul	2009	Jul	7	1	2009	A	1	2	189.3333333	0	0	9400	321165	321165	0.029268445	1	7.333333333	7/9/2009
5	Field Crop	9-Jul	2009	Jul	7	1	2009	B	1.5	2	205.3333333	0	0	9037	321165	321165	0.028138184	1	23.33333333	7/25/2009
7	Grains	9-Jul	2009	Jul	7	1	2009	A	1	2	189.3333333	0	0	1049	108163	108163	0.009698326	1	7.333333333	7/9/2009
7	Grains	9-Jul	2009	Jul	7	1	2009	B	1.5	2	205.3333333	0	0	868	108163	108163	0.008024925	1	23.33333333	7/25/2009
11	Alfalfa	9-Jul	2009	Jul	7	1	2009	A	1	2	189.3333333	0	0	1199	200092	200092	0.005992244	1	7.333333333	7/9/2009
11	Alfalfa	9-Jul	2009	Jul	7	1	2009	B	1.5	2	205.3333333	0	0	1933	200092	200092	0.009660556	1	23.33333333	7/25/2009
12	Rice	9-Jul	2009	Jul	7	1	2009	A	1	2	189.3333333	0	0	5963	1066952	1066952	0.005588817	1	7.333333333	7/9/2009
12	Rice	9-Jul	2009	Jul	7	1	2009	B	1.5	2	205.3333333	0	0	4919	1066952	1066952	0.004610329	1	23.33333333	7/25/2009
13	Row Crop	9-Jul	2009	Jul	7	1	2009	A	1	2	189.3333333	0	0	174	54305	54305	0.003204125	1	7.333333333	7/9/2009
13	Row Crop	9-Jul	2009	Jul	7	1	2009	B	1.5	2	205.3333333	0	0	148	54305	54305	0.002725348	1	23.33333333	7/25/2009
99	Suitable-unassigned	9-Jul	2009	Jul	7	1	2009	A	1	2	189.3333333	0	0	2698	191340	191340	0.014100554	1	7.333333333	7/9/2009
99	Suitable-unassigned	9-Jul	2009	Jul	7	1	2009	B	1.5	2	205.3333333	0	0	2136	191340	191340	0.011163374	1	23.33333333	7/25/2009
100	Vineyard/Orchard	9-Jul	2009	Jul	7	1	2009	A	1	2	189.3333333	0	0	8217	934031	934031	0.008797353	1	7.333333333	7/9/2009
100	Vineyard/Orchard	9-Jul	2009	Jul	7	1	2009	B	1.5	2	205.3333333	0	0	8526	934031	934031	0.009128177	1	23.33333333	7/25/2009
0	Unsuitable	10-Jul	2010	Jul	7	1	2010	B	1.5	2	208.3333333	0	0	31197	321715	321715	0.096970921	1	26.33333333	7/28/2010
1	Grass/Pasture	10-Jul	2010	Jul	7	1	2010	B	1.5	2	208.3333333	0	0	631	428238	428238	0.00147348	1	26.33333333	7/28/2010
3	Corn	10-Jul	2010	Jul	7	1	2010	B	1.5	2	208.3333333	0	0	169	52739	52739	0.00320446	1	26.33333333	7/28/2010
5	Field Crop	10-Jul	2010	Jul	7	1	2010	B	1.5	2	208.3333333	0	0	10500	321165	321165	0.032693475	1	26.33333333	7/28/2010
7	Grains	10-Jul	2010	Jul	7	1	2010	B	1.5	2	208.3333333	0	0	2120	108163	108163	0.019600048	1	26.33333333	7/28/2010
11	Alfalfa	10-Jul	2010	Jul	7	1	2010	B	1.5	2	208.3333333	0	0	1447	200092	200092	0.007231673	1	26.33333333	7/28/2010
12	Rice	10-Jul	2010	Jul	7	1	2010	B	1.5	2	208.3333333	0	0	5693	1066952	1066952	0.00533576	1	26.33333333	7/28/2010
13	Row Crop	10-Jul	2010	Jul	7	1	2010	B	1.5	2	208.3333333	0	0	628	54305	54305	0.011564313	1	26.33333333	7/28/2010
99	Suitable-unassigned	10-Jul	2010	Jul	7	1	2010	B	1.5	2	208.3333333	0	0	3181	191340	191340	0.016624856	1	26.33333333	7/28/2010
100	Vineyard/Orchard	10-Jul	2010	Jul	7	1	2010	B	1.5	2	208.3333333	0	0	9533	934031	934031	0.010206299	1	26.33333333	7/28/2010
0	Unsuitable	1-Aug	2001	Aug	8	2	2001	B	2.5	2	236.6666667	0	0	29710	309924	321715	0.095862211	0.963349549	54.66666667	8/25/2001
1	Grass/Pasture	1-Aug	2001	Aug	8	2	2001	B	2.5	2	236.6666667	0	0	551	401757	428238	0.001371476	0.938162891	54.66666667	8/25/2001
3	Corn	1-Aug	2001	Aug	8	2	2001	B	2.5	2	236.6666667	0	0	863	49977	52739	0.017267943	0.947628889	54.66666667	8/25/2001
5	Field Crop	1-Aug	2001	Aug	8	2	2001	B	2.5	2	236.6666667	0	0	12178	319339	321165	0.038135023	0.994314449	54.66666667	8/25/2001
7	Grains	1-Aug	2001	Aug	8	2	2001	B	2.5	2	236.6666667	0	0	1384	106342	108163	0.013014613	0.983164298	54.66666667	8/25/2001
11	Alfalfa	1-Aug	2001	Aug	8	2	2001	B	2.5	2	236.6666667	0	0	6341	194124	200092	0.032664689	0.97017372	54.66666667	8/25/2001
12	Rice	1-Aug	2001	Aug	8	2	2001	B	2.5	2	236.6666667	0	0	8941	1066942	1066952	0.008380024	0.999990628	54.66666667	8/25/2001
13	Row Crop	1-Aug	2001	Aug	8	2	2001	B	2.5	2	236.6666667	0	0	1645	54305	54305	0.03029187	1	54.66666667	8/25/2001
99	Suitable-unassigned	1-Aug	2001	Aug	8	2	2001	B	2.5	2	236.6666667	0	0	5646	187461	191340	0.030118265	0.979727187	54.66666667	8/25/2001
100	Vineyard/Orchard	1-Aug	2001	Aug	8	2	2001	B	2.5	2	236.6666667	0	0	14367	893493	934031	0.016079589	0.956598871	54.66666667	8/25/2001
0	Unsuitable	2-Aug	2002	Aug	8	2	2002	A	2	2	218.3333333	0	0	30443	309924	321715	0.098227307	0.963349549	36.33333333	8/7/2002
1	Grass/Pasture	2-Aug	2002	Aug	8	2	2002	A	2	2	218.3333333	0	0	446	401757	428238	0.001110124	0.938162891	36.33333333	8/7/2002
3	Corn	2-Aug	2002	Aug	8	2	2002	A	2	2	218.3333333	0	0	359	49977	52739	0.007183304	0.947628889	36.33333333	8/7/2002
5	Field Crop	2-Aug	2002	Aug	8	2	2002	A	2	2	218.3333333	0	0	10187	319339	321165	0.031900269	0.994314449	36.33333333	8/7/2002
7	Grains	2-Aug	2002	Aug	8	2	2002	A	2	2	218.3333333	0	0	1277	106342	108163	0.012008426	0.983164298	36.33333333	8/7/2002
11	Alfalfa	2-Aug	2002	Aug	8	2	2002	A	2	2	218.3333333	0	0	3731	194124	200092	0.019219674	0.97017372	36.33333333	8/7/2002
12	Rice	2-Aug	2002	Aug	8	2	2002	A	2	2	218.3333333	0	0	8946	1066942	1066952	0.008384711	0.999990628	36.33333333	8/7/2002
13	Row Crop	2-Aug	2002	Aug	8	2	2002	A	2	2	218.3333333	0	0	1314	54305	54305	0.024196667	1	36.33333333	8/7/2002
99	Suitable-unassigned	2-Aug	2002	Aug	8	2	2002	A	2	2	218.3333333	0	0	4007	187461	191340	0.021375113	0.979727187	36.33333333	8/7/2002
100	Vineyard/Orchard	2-Aug	2002	Aug	8	2	2002	A	2	2	218.3333333	0	0	10731	893493	934031	0.012010167	0.956598871	36.33333333	8/7/2002
0	Unsuitable	4-Aug	2004	Aug	8	2	2004	A	2	2	222.5	0	0	31550	309924	321715	0.101799151	0.963349549	39.5	8/10/2004
0	Unsuitable	4-Aug	2004	Aug	8	2	2004	B	2.5	2	238.5	0	0	31733	321715	321715	0.098636992	1	55.5	8/26/2004
1	Grass/Pasture	4-Aug	2004	Aug	8	2	2004	A	2	2	222.5	0	0	435	401757	428238	0.001082744	0.938162891	39.5	8/10/2004
1	Grass/Pasture	4-Aug	2004	Aug	8	2	2004	B	2.5	2	238.5	0	0	397	428238	428238	0.000927055	1	55.5	8/26/2004
3	Corn	4-Aug	2004	Aug	8	2	2004	A	2	2	222.5	0	0	1193	49977	52739	0.023870981	0.947628889	39.5	8/10/2004
3	Corn	4-Aug	2004	Aug	8	2	2004	B	2.5	2	238.5	0	0	1052	52739	52739	0.019947288	1	55.5	8/26/2004
5	Field Crop	4-Aug	2004	Aug	8	2	2004	A	2	2	222.5	0	0	13800	319339	321165	0.043214264	0.994314449	39.5	8/10/2004
5	Field Crop	4-Aug	2004	Aug	8	2	2004	B	2.5	2	238.5	0	0	10963	321165	321165	0.034135102	1	55.5	8/26/2004
7	Grains	4-Aug	2004	Aug	8	2	2004	A	2	2	222.5	0	0	2335	106342	108163	0.021957458	0.983164298	39.5	8/10/2004
7	Grains	4-Aug	2004	Aug	8	2	2004	B	2.5	2	238.5	0	0	1287	108163	108163	0.011898708	1	55.5	8/26/2004
11	Alfalfa	4-Aug	2004	Aug	8	2	2004	A	2	2	222.5	0	0	4642	194124	200092	0.023912551	0.97017372	39.5	8/10/2004
11	Alfalfa	4-Aug	2004	Aug	8	2	2004	B	2.5	2	238.5	0	0	3643	200092	200092	0.018206625	1	55.5	8/26/2004
12	Rice	4-Aug	2004	Aug	8	2	2004	A	2	2	222.5	0	0	8432	1066942	1066952	0.00790296	0.999990628	39.5	8/10/2004
12	Rice	4-Aug	2004	Aug	8	2	2004	B	2.5	2	238.5	0	0	7411	1066952	1066952	0.006945954	1	55.5	8/26/2004
13	Row Crop	4-Aug	2004	Aug	8	2	2004	A	2	2	222.5	0	0	2182	54305	54305	0.040180462	1	39.5	8/10/2004
13	Row Crop	4-Aug	2004	Aug	8	2	2004	B	2.5	2	238.5	0	0	1242	54305	54305	0.022870822	1	55.5	8/26/2004
99	Suitable-unassigned	4-Aug	2004	Aug	8	2	2004	A	2	2	222.5	0	0	6513	187461	191340	0.034743227	0.979727187	39.5	8/10/2004
99	Suitable-unassigned	4-Aug	2004	Aug	8	2	2004	B	2.5	2	238.5	0	0	4527	191340	191340	0.023659454	1	55.5	8/26/2004
100	Vineyard/Orchard	4-Aug	2004	Aug	8	2	2004	A	2	2	222.5	0	0	13763	893493	934031	0.01540359	0.956598871	39.5	8/10/2004
100	Vineyard/Orchard	4-Aug	2004	Aug	8	2	2004	B	2.5	2	238.5	0	0	13854	934031	934031	0.014832484	1	55.5	8/26/2004
0	Unsuitable	5-Aug	2005	Aug	8	2	2005	B	2.5	2	231.6666667	0	0	28873	309924	321715	0.093161549	0.963349549	49.66666667	8/20/2005
1	Grass/Pasture	5-Aug	2005	Aug	8	2	2005	B	2.5	2	231.6666667	0	0	398	401757	428238	0.000990649	0.938162891	49.66666667	8/20/2005
3	Corn	5-Aug	2005	Aug	8	2	2005	B	2.5	2	231.6666667	0	0	488	49977	52739	0.009764492	0.947628889	49.66666667	8/20/2005
5	Field Crop	5-Aug	2005	Aug	8	2	2005	B	2.5	2	231.6666667	0	0	8631	319339	321165	0.027027704	0.994314449	49.66666667	8/20/2005
7	Grains	5-Aug	2005	Aug	8	2	2005	B	2.5	2	231.6666667	0	0	602	106342	108163	0.005660981	0.983164298	49.66666667	8/20/2005
11	Alfalfa	5-Aug	2005	Aug	8	2	2005	B	2.5	2	231.6666667	0	0	3129	194124	200092	0.016118563	0.97017372	49.66666667	8/20/2005
12	Rice	5-Aug	2005	Aug	8	2	2005	B	2.5	2	231.6666667	0	0	6654	1066942	1066952	0.006236515	0.999990628	49.66666667	8/20/2005
13	Row Crop	5-Aug	2005	Aug	8	2	2005	B	2.5	2	231.6666667	0	0	694	54305	54305	0.01277967	1	49.66666667	8/20/2005
99	Suitable-unassigned	5-Aug	2005	Aug	8	2	2005	B	2.5	2	231.6666667	0	0	3478	187461	191340	0.018553192	0.979727187	49.66666667	8/20/2005
100	Vineyard/Orchard	5-Aug	2005	Aug	8	2	2005	B	2.5	2	231.6666667	0	0	11719	893493	934031	0.013115939	0.956598871	49.66666667	8/20/2005
0	Unsuitable	6-Aug	2006	Aug	8	2	2006	A	2	2	218.6666667	0	0	31321	321715	321715	0.097356356	1	36.66666667	8/7/2006
1	Grass/Pasture	6-Aug	2006	Aug	8	2	2006	A	2	2	218.6666667	0	0	505	428238	428238	0.001179251	1	36.66666667	8/7/2006
3	Corn	6-Aug	2006	Aug	8	2	2006	A	2	2	218.6666667	0	0	503	52739	52739	0.009537534	1	36.66666667	8/7/2006
5	Field Crop	6-Aug	2006	Aug	8	2	2006	A	2	2	218.6666667	0	0	8892	321165	321165	0.027686703	1	36.66666667	8/7/2006
7	Grains	6-Aug	2006	Aug	8	2	2006	A	2	2	218.6666667	0	0	789	108163	108163	0.007294546	1	36.66666667	8/7/2006
11	Alfalfa	6-Aug	2006	Aug	8	2	2006	A	2	2	218.6666667	0	0	1924	200092	200092	0.009615577	1	36.66666667	8/7/2006
12	Rice	6-Aug	2006	Aug	8	2	2006	A	2	2	218.6666667	0	0	5087	1066952	1066952	0.004767787	1	36.66666667	8/7/2006
13	Row Crop	6-Aug	2006	Aug	8	2	2006	A	2	2	218.6666667	0	0	435	54305	54305	0.008010312	1	36.66666667	8/7/2006
99	Suitable-unassigned	6-Aug	2006	Aug	8	2	2006	A	2	2	218.6666667	0	0	2337	191340	191340	0.01221386	1	36.66666667	8/7/2006
100	Vineyard/Orchard	6-Aug	2006	Aug	8	2	2006	A	2	2	218.6666667	0	0	15612	934031	934031	0.016714649	1	36.66666667	8/7/2006
0	Unsuitable	7-Aug	2007	Aug	8	2	2007	B	2.5	2	237.6666667	0	0	30475	321715	321715	0.094726699	1	55.66666667	8/26/2007
1	Grass/Pasture	7-Aug	2007	Aug	8	2	2007	B	2.5	2	237.6666667	0	0	271	428238	428238	0.000632826	1	55.66666667	8/26/2007
3	Corn	7-Aug	2007	Aug	8	2	2007	B	2.5	2	237.6666667	0	0	1814	52739	52739	0.034395798	1	55.66666667	8/26/2007
5	Field Crop	7-Aug	2007	Aug	8	2	2007	B	2.5	2	237.6666667	0	0	11758	321165	321165	0.036610465	1	55.66666667	8/26/2007
7	Grains	7-Aug	2007	Aug	8	2	2007	B	2.5	2	237.6666667	0	0	2066	108163	108163	0.019100802	1	55.66666667	8/26/2007
11	Alfalfa	7-Aug	2007	Aug	8	2	2007	B	2.5	2	237.6666667	0	0	3781	200092	200092	0.018896308	1	55.66666667	8/26/2007
12	Rice	7-Aug	2007	Aug	8	2	2007	B	2.5	2	237.6666667	0	0	6989	1066952	1066952	0.006550435	1	55.66666667	8/26/2007
13	Row Crop	7-Aug	2007	Aug	8	2	2007	B	2.5	2	237.6666667	0	0	1296	54305	54305	0.023865206	1	55.66666667	8/26/2007
99	Suitable-unassigned	7-Aug	2007	Aug	8	2	2007	B	2.5	2	237.6666667	0	0	5046	191340	191340	0.026371903	1	55.66666667	8/26/2007
100	Vineyard/Orchard	7-Aug	2007	Aug	8	2	2007	B	2.5	2	237.6666667	0	0	12018	934031	934031	0.012866811	1	55.66666667	8/26/2007
0	Unsuitable	8-Aug	2008	Aug	8	2	2008	B	2.5	2	235.3333333	0	0	32857	321715	321715	0.102130768	1	52.33333333	8/23/2008
1	Grass/Pasture	8-Aug	2008	Aug	8	2	2008	B	2.5	2	235.3333333	0	0	1073	428238	428238	0.002505616	1	52.33333333	8/23/2008
3	Corn	8-Aug	2008	Aug	8	2	2008	B	2.5	2	235.3333333	0	0	902	52739	52739	0.017103093	1	52.33333333	8/23/2008
5	Field Crop	8-Aug	2008	Aug	8	2	2008	B	2.5	2	235.3333333	0	0	13299	321165	321165	0.041408622	1	52.33333333	8/23/2008
7	Grains	8-Aug	2008	Aug	8	2	2008	B	2.5	2	235.3333333	0	0	1904	108163	108163	0.017603062	1	52.33333333	8/23/2008
11	Alfalfa	8-Aug	2008	Aug	8	2	2008	B	2.5	2	235.3333333	0	0	2405	200092	200092	0.012019471	1	52.33333333	8/23/2008
12	Rice	8-Aug	2008	Aug	8	2	2008	B	2.5	2	235.3333333	0	0	5258	1066952	1066952	0.004928057	1	52.33333333	8/23/2008
13	Row Crop	8-Aug	2008	Aug	8	2	2008	B	2.5	2	235.3333333	0	0	1397	54305	54305	0.025725071	1	52.33333333	8/23/2008
99	Suitable-unassigned	8-Aug	2008	Aug	8	2	2008	B	2.5	2	235.3333333	0	0	4540	191340	191340	0.023727396	1	52.33333333	8/23/2008
100	Vineyard/Orchard	8-Aug	2008	Aug	8	2	2008	B	2.5	2	235.3333333	0	0	14004	934031	934031	0.014993078	1	52.33333333	8/23/2008
0	Unsuitable	9-Aug	2009	Aug	8	2	2009	A	2	2	219.5	0	0	25597	321715	321715	0.079564211	1	37.5	8/8/2009
0	Unsuitable	9-Aug	2009	Aug	8	2	2009	B	2.5	2	237.3333333	0	0	27296	314957	321715	0.086665799	0.97899383	55.33333333	8/26/2009
1	Grass/Pasture	9-Aug	2009	Aug	8	2	2009	A	2	2	219.5	0	0	840	428238	428238	0.001961526	1	37.5	8/8/2009
1	Grass/Pasture	9-Aug	2009	Aug	8	2	2009	B	2.5	2	237.3333333	0	0	401	428232	428238	0.000936408	0.999985989	55.33333333	8/26/2009
3	Corn	9-Aug	2009	Aug	8	2	2009	A	2	2	219.5	0	0	481	52739	52739	0.009120385	1	37.5	8/8/2009
3	Corn	9-Aug	2009	Aug	8	2	2009	B	2.5	2	237.3333333	0	0	1076	50829	52739	0.021169018	0.963783917	55.33333333	8/26/2009
5	Field Crop	9-Aug	2009	Aug	8	2	2009	A	2	2	219.5	0	0	8094	321165	321165	0.025201999	1	37.5	8/8/2009
5	Field Crop	9-Aug	2009	Aug	8	2	2009	B	2.5	2	237.3333333	0	0	10162	313206	321165	0.0324451	0.975218346	55.33333333	8/26/2009
7	Grains	9-Aug	2009	Aug	8	2	2009	A	2	2	219.5	0	0	2302	108163	108163	0.021282694	1	37.5	8/8/2009
7	Grains	9-Aug	2009	Aug	8	2	2009	B	2.5	2	237.3333333	0	0	1710	107082	108163	0.01596907	0.990005825	55.33333333	8/26/2009
11	Alfalfa	9-Aug	2009	Aug	8	2	2009	A	2	2	219.5	0	0	3090	200092	200092	0.015442896	1	37.5	8/8/2009
11	Alfalfa	9-Aug	2009	Aug	8	2	2009	B	2.5	2	237.3333333	0	0	3042	197185	200092	0.015427137	0.985471683	55.33333333	8/26/2009
12	Rice	9-Aug	2009	Aug	8	2	2009	A	2	2	219.5	0	0	3069	1066952	1066952	0.002876418	1	37.5	8/8/2009
12	Rice	9-Aug	2009	Aug	8	2	2009	B	2.5	2	237.3333333	0	0	5318	1017634	1066952	0.005225847	0.95377674	55.33333333	8/26/2009
13	Row Crop	9-Aug	2009	Aug	8	2	2009	A	2	2	219.5	0	0	1317	54305	54305	0.024251911	1	37.5	8/8/2009
13	Row Crop	9-Aug	2009	Aug	8	2	2009	B	2.5	2	237.3333333	0	0	1520	54031	54305	0.028131998	0.994954424	55.33333333	8/26/2009
99	Suitable-unassigned	9-Aug	2009	Aug	8	2	2009	A	2	2	219.5	0	0	4256	191340	191340	0.022243127	1	37.5	8/8/2009
99	Suitable-unassigned	9-Aug	2009	Aug	8	2	2009	B	2.5	2	237.3333333	0	0	4720	185166	191340	0.025490641	0.967732832	55.33333333	8/26/2009
100	Vineyard/Orchard	9-Aug	2009	Aug	8	2	2009	A	2	2	219.5	0	0	10739	934031	934031	0.011497477	1	37.5	8/8/2009
100	Vineyard/Orchard	9-Aug	2009	Aug	8	2	2009	B	2.5	2	237.3333333	0	0	8293	931964	934031	0.008898412	0.997787011	55.33333333	8/26/2009
0	Unsuitable	10-Aug	2010	Aug	8	2	2010	A	2	2	222.5	0	0	29538	321715	321715	0.091814183	1	40.5	8/11/2010
0	Unsuitable	10-Aug	2010	Aug	8	2	2010	B	2.5	2	235	0	0	28270	321715	321715	0.087872807	1	53	8/24/2010
1	Grass/Pasture	10-Aug	2010	Aug	8	2	2010	A	2	2	222.5	0	0	739	428238	428238	0.001725676	1	40.5	8/11/2010
1	Grass/Pasture	10-Aug	2010	Aug	8	2	2010	B	2.5	2	235	0	0	837	428238	428238	0.001954521	1	53	8/24/2010
3	Corn	10-Aug	2010	Aug	8	2	2010	A	2	2	222.5	0	0	235	52739	52739	0.004455905	1	40.5	8/11/2010
3	Corn	10-Aug	2010	Aug	8	2	2010	B	2.5	2	235	0	0	528	52739	52739	0.010011566	1	53	8/24/2010
5	Field Crop	10-Aug	2010	Aug	8	2	2010	A	2	2	222.5	0	0	10274	321165	321165	0.031989787	1	40.5	8/11/2010
5	Field Crop	10-Aug	2010	Aug	8	2	2010	B	2.5	2	235	0	0	8765	321165	321165	0.027291268	1	53	8/24/2010
7	Grains	10-Aug	2010	Aug	8	2	2010	A	2	2	222.5	0	0	2001	108163	108163	0.018499857	1	40.5	8/11/2010
7	Grains	10-Aug	2010	Aug	8	2	2010	B	2.5	2	235	0	0	1562	108163	108163	0.014441167	1	53	8/24/2010
11	Alfalfa	10-Aug	2010	Aug	8	2	2010	A	2	2	222.5	0	0	1808	200092	200092	0.009035844	1	40.5	8/11/2010
11	Alfalfa	10-Aug	2010	Aug	8	2	2010	B	2.5	2	235	0	0	2037	200092	200092	0.010180317	1	53	8/24/2010
12	Rice	10-Aug	2010	Aug	8	2	2010	A	2	2	222.5	0	0	4113	1066952	1066952	0.003854906	1	40.5	8/11/2010
12	Rice	10-Aug	2010	Aug	8	2	2010	B	2.5	2	235	0	0	3930	1066952	1066952	0.00368339	1	53	8/24/2010
13	Row Crop	10-Aug	2010	Aug	8	2	2010	A	2	2	222.5	0	0	1467	54305	54305	0.027014087	1	40.5	8/11/2010
13	Row Crop	10-Aug	2010	Aug	8	2	2010	B	2.5	2	235	0	0	909	54305	54305	0.01673879	1	53	8/24/2010
99	Suitable-unassigned	10-Aug	2010	Aug	8	2	2010	A	2	2	222.5	0	0	3435	191340	191340	0.017952336	1	40.5	8/11/2010
99	Suitable-unassigned	10-Aug	2010	Aug	8	2	2010	B	2.5	2	235	0	0	3774	191340	191340	0.019724051	1	53	8/24/2010
100	Vineyard/Orchard	10-Aug	2010	Aug	8	2	2010	A	2	2	222.5	0	0	10552	934031	934031	0.01129727	1	40.5	8/11/2010
100	Vineyard/Orchard	10-Aug	2010	Aug	8	2	2010	B	2.5	2	235	0	0	9449	934031	934031	0.010116367	1	53	8/24/2010
0	Unsuitable	11-Aug	2011	Aug	8	2	2011	B	2.5	2	232.6666667	0	0	30954	321715	321715	0.096215595	1	50.66666667	8/21/2011
1	Grass/Pasture	11-Aug	2011	Aug	8	2	2011	B	2.5	2	232.6666667	0	0	905	428238	428238	0.002113311	1	50.66666667	8/21/2011
3	Corn	11-Aug	2011	Aug	8	2	2011	B	2.5	2	232.6666667	0	0	189	52739	52739	0.003583686	1	50.66666667	8/21/2011
5	Field Crop	11-Aug	2011	Aug	8	2	2011	B	2.5	2	232.6666667	0	0	10679	321165	321165	0.033250821	1	50.66666667	8/21/2011
7	Grains	11-Aug	2011	Aug	8	2	2011	B	2.5	2	232.6666667	0	0	1266	108163	108163	0.011704557	1	50.66666667	8/21/2011
11	Alfalfa	11-Aug	2011	Aug	8	2	2011	B	2.5	2	232.6666667	0	0	2283	200092	200092	0.011409752	1	50.66666667	8/21/2011
12	Rice	11-Aug	2011	Aug	8	2	2011	B	2.5	2	232.6666667	0	0	3946	1066952	1066952	0.003698386	1	50.66666667	8/21/2011
13	Row Crop	11-Aug	2011	Aug	8	2	2011	B	2.5	2	232.6666667	0	0	703	54305	54305	0.012945401	1	50.66666667	8/21/2011
99	Suitable-unassigned	11-Aug	2011	Aug	8	2	2011	B	2.5	2	232.6666667	0	0	2832	191340	191340	0.014800878	1	50.66666667	8/21/2011
100	Vineyard/Orchard	11-Aug	2011	Aug	8	2	2011	B	2.5	2	232.6666667	0	0	9998	934031	934031	0.010704142	1	50.66666667	8/21/2011
0	Unsuitable	13-Aug	2013	Aug	8	2	2013	B	2.5	2	237.6666667	0	0	13620	240408	321715	0.056653689	0.747270099	55.66666667	8/26/2013
1	Grass/Pasture	13-Aug	2013	Aug	8	2	2013	B	2.5	2	237.6666667	0	0	144	366162	428238	0.000393269	0.855043224	55.66666667	8/26/2013
3	Corn	13-Aug	2013	Aug	8	2	2013	B	2.5	2	237.6666667	0	0	25	40221	52739	0.000621566	0.762642447	55.66666667	8/26/2013
5	Field Crop	13-Aug	2013	Aug	8	2	2013	B	2.5	2	237.6666667	0	0	2353	276929	321165	0.008496763	0.862263945	55.66666667	8/26/2013
7	Grains	13-Aug	2013	Aug	8	2	2013	B	2.5	2	237.6666667	0	0	129	96777	108163	0.001332961	0.894732949	55.66666667	8/26/2013
11	Alfalfa	13-Aug	2013	Aug	8	2	2013	B	2.5	2	237.6666667	0	0	71	162883	200092	0.000435896	0.814040541	55.66666667	8/26/2013
12	Rice	13-Aug	2013	Aug	8	2	2013	B	2.5	2	237.6666667	0	0	1938	928536	1066952	0.002087157	0.870269703	55.66666667	8/26/2013
13	Row Crop	13-Aug	2013	Aug	8	2	2013	B	2.5	2	237.6666667	0	0	3	52036	54305	5.77E-05	0.958217475	55.66666667	8/26/2013
99	Suitable-unassigned	13-Aug	2013	Aug	8	2	2013	B	2.5	2	237.6666667	0	0	535	167699	191340	0.00319024	0.876445072	55.66666667	8/26/2013
100	Vineyard/Orchard	13-Aug	2013	Aug	8	2	2013	B	2.5	2	237.6666667	0	0	828	709251	934031	0.001167429	0.759344176	55.66666667	8/26/2013
0	Unsuitable	1-Sep	2001	Sep	9	3	2001	A	3	2	252.6666667	0	0	34303	304254	321715	0.112744615	0.945725254	70.66666667	9/10/2001
1	Grass/Pasture	1-Sep	2001	Sep	9	3	2001	A	3	2	252.6666667	0	0	822	400366	428238	0.002053121	0.934914697	70.66666667	9/10/2001
3	Corn	1-Sep	2001	Sep	9	3	2001	A	3	2	252.6666667	0	0	1496	44512	52739	0.033608914	0.844005385	70.66666667	9/10/2001
5	Field Crop	1-Sep	2001	Sep	9	3	2001	A	3	2	252.6666667	0	0	16738	317182	321165	0.052770964	0.987598275	70.66666667	9/10/2001
7	Grains	1-Sep	2001	Sep	9	3	2001	A	3	2	252.6666667	0	0	3816	103877	108163	0.036735755	0.96037462	70.66666667	9/10/2001
11	Alfalfa	1-Sep	2001	Sep	9	3	2001	A	3	2	252.6666667	0	0	9420	184125	200092	0.051160896	0.920201707	70.66666667	9/10/2001
12	Rice	1-Sep	2001	Sep	9	3	2001	A	3	2	252.6666667	0	0	19388	1054149	1066952	0.018392087	0.988000397	70.66666667	9/10/2001
13	Row Crop	1-Sep	2001	Sep	9	3	2001	A	3	2	252.6666667	0	0	3646	54269	54305	0.067183843	0.999337078	70.66666667	9/10/2001
99	Suitable-unassigned	1-Sep	2001	Sep	9	3	2001	A	3	2	252.6666667	0	0	9019	184152	191340	0.048975846	0.962433365	70.66666667	9/10/2001
100	Vineyard/Orchard	1-Sep	2001	Sep	9	3	2001	A	3	2	252.6666667	0	0	21225	846812	934031	0.025064595	0.906620872	70.66666667	9/10/2001
0	Unsuitable	2-Sep	2002	Sep	9	3	2002	A	3	2	250.3333333	0	0	29875	321715	321715	0.092861694	1	68.33333333	9/8/2002
0	Unsuitable	2-Sep	2002	Sep	9	3	2002	B	3.5	2	266.3333333	0	0	33244	321715	321715	0.103333696	1	84.33333333	9/24/2002
1	Grass/Pasture	2-Sep	2002	Sep	9	3	2002	A	3	2	250.3333333	0	0	351	428238	428238	0.000819638	1	68.33333333	9/8/2002
1	Grass/Pasture	2-Sep	2002	Sep	9	3	2002	B	3.5	2	266.3333333	0	0	483	428238	428238	0.001127877	1	84.33333333	9/24/2002
3	Corn	2-Sep	2002	Sep	9	3	2002	A	3	2	250.3333333	0	0	651	52739	52739	0.012343806	1	68.33333333	9/8/2002
3	Corn	2-Sep	2002	Sep	9	3	2002	B	3.5	2	266.3333333	0	0	1452	52739	52739	0.027531808	1	84.33333333	9/24/2002
5	Field Crop	2-Sep	2002	Sep	9	3	2002	A	3	2	250.3333333	0	0	10209	321165	321165	0.031787399	1	68.33333333	9/8/2002
5	Field Crop	2-Sep	2002	Sep	9	3	2002	B	3.5	2	266.3333333	0	0	15550	321165	321165	0.04841748	1	84.33333333	9/24/2002
7	Grains	2-Sep	2002	Sep	9	3	2002	A	3	2	250.3333333	0	0	1691	108163	108163	0.015633812	1	68.33333333	9/8/2002
7	Grains	2-Sep	2002	Sep	9	3	2002	B	3.5	2	266.3333333	0	0	2617	108163	108163	0.024194965	1	84.33333333	9/24/2002
11	Alfalfa	2-Sep	2002	Sep	9	3	2002	A	3	2	250.3333333	0	0	3905	200092	200092	0.019516023	1	68.33333333	9/8/2002
11	Alfalfa	2-Sep	2002	Sep	9	3	2002	B	3.5	2	266.3333333	0	0	6174	200092	200092	0.030855806	1	84.33333333	9/24/2002
12	Rice	2-Sep	2002	Sep	9	3	2002	A	3	2	250.3333333	0	0	7727	1066952	1066952	0.007242125	1	68.33333333	9/8/2002
12	Rice	2-Sep	2002	Sep	9	3	2002	B	3.5	2	266.3333333	0	0	29008	1066952	1066952	0.027187727	1	84.33333333	9/24/2002
13	Row Crop	2-Sep	2002	Sep	9	3	2002	A	3	2	250.3333333	0	0	1325	54305	54305	0.024399227	1	68.33333333	9/8/2002
13	Row Crop	2-Sep	2002	Sep	9	3	2002	B	3.5	2	266.3333333	0	0	2540	54305	54305	0.046772857	1	84.33333333	9/24/2002
99	Suitable-unassigned	2-Sep	2002	Sep	9	3	2002	A	3	2	250.3333333	0	0	4345	191340	191340	0.022708268	1	68.33333333	9/8/2002
99	Suitable-unassigned	2-Sep	2002	Sep	9	3	2002	B	3.5	2	266.3333333	0	0	7470	191340	191340	0.039040452	1	84.33333333	9/24/2002
100	Vineyard/Orchard	2-Sep	2002	Sep	9	3	2002	A	3	2	250.3333333	0	0	11821	934031	934031	0.012655897	1	68.33333333	9/8/2002
100	Vineyard/Orchard	2-Sep	2002	Sep	9	3	2002	B	3.5	2	266.3333333	0	0	17196	934031	934031	0.018410524	1	84.33333333	9/24/2002
0	Unsuitable	5-Sep	2005	Sep	9	3	2005	B	3.5	2	263.6666667	0	0	20391	233456	321715	0.087344082	0.725660911	81.66666667	9/21/2005
1	Grass/Pasture	5-Sep	2005	Sep	9	3	2005	B	3.5	2	263.6666667	0	0	601	270790	428238	0.002219432	0.63233529	81.66666667	9/21/2005
3	Corn	5-Sep	2005	Sep	9	3	2005	B	3.5	2	263.6666667	0	0	423	41422	52739	0.010211965	0.785414968	81.66666667	9/21/2005
5	Field Crop	5-Sep	2005	Sep	9	3	2005	B	3.5	2	263.6666667	0	0	6015	199817	321165	0.030102544	0.622163063	81.66666667	9/21/2005
7	Grains	5-Sep	2005	Sep	9	3	2005	B	3.5	2	263.6666667	0	0	597	45531	108163	0.013111946	0.420948014	81.66666667	9/21/2005
11	Alfalfa	5-Sep	2005	Sep	9	3	2005	B	3.5	2	263.6666667	0	0	1754	100471	200092	0.017457774	0.502124023	81.66666667	9/21/2005
12	Rice	5-Sep	2005	Sep	9	3	2005	B	3.5	2	263.6666667	0	0	3053	862007	1066952	0.003541735	0.807915445	81.66666667	9/21/2005
13	Row Crop	5-Sep	2005	Sep	9	3	2005	B	3.5	2	263.6666667	0	0	497	15334	54305	0.032411634	0.282368106	81.66666667	9/21/2005
99	Suitable-unassigned	5-Sep	2005	Sep	9	3	2005	B	3.5	2	263.6666667	0	0	2810	91297	191340	0.030778667	0.477145396	81.66666667	9/21/2005
100	Vineyard/Orchard	5-Sep	2005	Sep	9	3	2005	B	3.5	2	263.6666667	0	0	11945	712136	934031	0.016773481	0.762432939	81.66666667	9/21/2005
0	Unsuitable	6-Sep	2006	Sep	9	3	2006	A	3	2	250.6666667	0	0	30385	309924	321715	0.098040165	0.963349549	68.66666667	9/8/2006
0	Unsuitable	6-Sep	2006	Sep	9	3	2006	B	3.5	2	266.6666667	0	0	28145	129784	321715	0.216860322	0.403412959	84.66666667	9/24/2006
1	Grass/Pasture	6-Sep	2006	Sep	9	3	2006	A	3	2	250.6666667	0	0	366	401757	428238	0.000910998	0.938162891	68.66666667	9/8/2006
1	Grass/Pasture	6-Sep	2006	Sep	9	3	2006	B	3.5	2	266.6666667	0	0	3262	199297	428238	0.016367532	0.465388406	84.66666667	9/24/2006
3	Corn	6-Sep	2006	Sep	9	3	2006	A	3	2	250.6666667	0	0	264	49977	52739	0.00528243	0.947628889	68.66666667	9/8/2006
3	Corn	6-Sep	2006	Sep	9	3	2006	B	3.5	2	266.6666667	0	0	7555	18329	52739	0.412188335	0.347541667	84.66666667	9/24/2006
5	Field Crop	6-Sep	2006	Sep	9	3	2006	A	3	2	250.6666667	0	0	10356	319339	321165	0.032429487	0.994314449	68.66666667	9/8/2006
5	Field Crop	6-Sep	2006	Sep	9	3	2006	B	3.5	2	266.6666667	0	0	25504	146884	321165	0.173633616	0.457347469	84.66666667	9/24/2006
7	Grains	6-Sep	2006	Sep	9	3	2006	A	3	2	250.6666667	0	0	1544	106342	108163	0.014519193	0.983164298	68.66666667	9/8/2006
7	Grains	6-Sep	2006	Sep	9	3	2006	B	3.5	2	266.6666667	0	0	10988	58403	108163	0.18814102	0.539953589	84.66666667	9/24/2006
11	Alfalfa	6-Sep	2006	Sep	9	3	2006	A	3	2	250.6666667	0	0	3337	194124	200092	0.017190043	0.97017372	68.66666667	9/8/2006
11	Alfalfa	6-Sep	2006	Sep	9	3	2006	B	3.5	2	266.6666667	0	0	19538	115769	200092	0.168767114	0.578578854	84.66666667	9/24/2006
12	Rice	6-Sep	2006	Sep	9	3	2006	A	3	2	250.6666667	0	0	4566	1066942	1066952	0.00427952	0.999990628	68.66666667	9/8/2006
12	Rice	6-Sep	2006	Sep	9	3	2006	B	3.5	2	266.6666667	0	0	15630	339907	1066952	0.045983166	0.318577593	84.66666667	9/24/2006
13	Row Crop	6-Sep	2006	Sep	9	3	2006	A	3	2	250.6666667	0	0	1712	54305	54305	0.031525642	1	68.66666667	9/8/2006
13	Row Crop	6-Sep	2006	Sep	9	3	2006	B	3.5	2	266.6666667	0	0	7541	31206	54305	0.241652246	0.574643219	84.66666667	9/24/2006
99	Suitable-unassigned	6-Sep	2006	Sep	9	3	2006	A	3	2	250.6666667	0	0	4026	187461	191340	0.021476467	0.979727187	68.66666667	9/8/2006
99	Suitable-unassigned	6-Sep	2006	Sep	9	3	2006	B	3.5	2	266.6666667	0	0	16019	102858	191340	0.15573898	0.537566635	84.66666667	9/24/2006
100	Vineyard/Orchard	6-Sep	2006	Sep	9	3	2006	A	3	2	250.6666667	0	0	13106	893493	934031	0.014668274	0.956598871	68.66666667	9/8/2006
100	Vineyard/Orchard	6-Sep	2006	Sep	9	3	2006	B	3.5	2	266.6666667	0	0	49899	505902	934031	0.098633727	0.541632986	84.66666667	9/24/2006
0	Unsuitable	7-Sep	2007	Sep	9	3	2007	A	3	2	251	0	0	29182	309924	321715	0.094158568	0.963349549	69	9/9/2007
1	Grass/Pasture	7-Sep	2007	Sep	9	3	2007	A	3	2	251	0	0	285	401757	428238	0.000709384	0.938162891	69	9/9/2007
3	Corn	7-Sep	2007	Sep	9	3	2007	A	3	2	251	0	0	844	49977	52739	0.016887768	0.947628889	69	9/9/2007
5	Field Crop	7-Sep	2007	Sep	9	3	2007	A	3	2	251	0	0	9013	319339	321165	0.028223925	0.994314449	69	9/9/2007
7	Grains	7-Sep	2007	Sep	9	3	2007	A	3	2	251	0	0	2151	106342	108163	0.020227192	0.983164298	69	9/9/2007
11	Alfalfa	7-Sep	2007	Sep	9	3	2007	A	3	2	251	0	0	4139	194124	200092	0.021321423	0.97017372	69	9/9/2007
12	Rice	7-Sep	2007	Sep	9	3	2007	A	3	2	251	0	0	4645	1066942	1066952	0.004353564	0.999990628	69	9/9/2007
13	Row Crop	7-Sep	2007	Sep	9	3	2007	A	3	2	251	0	0	815	54305	54305	0.015007826	1	69	9/9/2007
99	Suitable-unassigned	7-Sep	2007	Sep	9	3	2007	A	3	2	251	0	0	3655	187461	191340	0.019497389	0.979727187	69	9/9/2007
100	Vineyard/Orchard	7-Sep	2007	Sep	9	3	2007	A	3	2	251	0	0	10361	893493	934031	0.011596062	0.956598871	69	9/9/2007
0	Unsuitable	8-Sep	2008	Sep	9	3	2008	A	3	2	251.3333333	0	0	31818	321715	321715	0.098901201	1	68.33333333	9/8/2008
1	Grass/Pasture	8-Sep	2008	Sep	9	3	2008	A	3	2	251.3333333	0	0	1525	428238	428238	0.003561104	1	68.33333333	9/8/2008
3	Corn	8-Sep	2008	Sep	9	3	2008	A	3	2	251.3333333	0	0	1273	52739	52739	0.024137735	1	68.33333333	9/8/2008
5	Field Crop	8-Sep	2008	Sep	9	3	2008	A	3	2	251.3333333	0	0	11853	321165	321165	0.036906263	1	68.33333333	9/8/2008
7	Grains	8-Sep	2008	Sep	9	3	2008	A	3	2	251.3333333	0	0	2311	108163	108163	0.021365901	1	68.33333333	9/8/2008
11	Alfalfa	8-Sep	2008	Sep	9	3	2008	A	3	2	251.3333333	0	0	4983	200092	200092	0.024903544	1	68.33333333	9/8/2008
12	Rice	8-Sep	2008	Sep	9	3	2008	A	3	2	251.3333333	0	0	7733	1066952	1066952	0.007247749	1	68.33333333	9/8/2008
13	Row Crop	8-Sep	2008	Sep	9	3	2008	A	3	2	251.3333333	0	0	1927	54305	54305	0.035484762	1	68.33333333	9/8/2008
99	Suitable-unassigned	8-Sep	2008	Sep	9	3	2008	A	3	2	251.3333333	0	0	4730	191340	191340	0.024720393	1	68.33333333	9/8/2008
100	Vineyard/Orchard	8-Sep	2008	Sep	9	3	2008	A	3	2	251.3333333	0	0	11990	934031	934031	0.012836833	1	68.33333333	9/8/2008
0	Unsuitable	9-Sep	2009	Sep	9	3	2009	A	3	2	251.5	0	0	30122	321715	321715	0.093629455	1	69.5	9/9/2009
1	Grass/Pasture	9-Sep	2009	Sep	9	3	2009	A	3	2	251.5	0	0	650	428238	428238	0.001517848	1	69.5	9/9/2009
3	Corn	9-Sep	2009	Sep	9	3	2009	A	3	2	251.5	0	0	833	52739	52739	0.015794763	1	69.5	9/9/2009
5	Field Crop	9-Sep	2009	Sep	9	3	2009	A	3	2	251.5	0	0	9400	321165	321165	0.029268445	1	69.5	9/9/2009
7	Grains	9-Sep	2009	Sep	9	3	2009	A	3	2	251.5	0	0	1049	108163	108163	0.009698326	1	69.5	9/9/2009
11	Alfalfa	9-Sep	2009	Sep	9	3	2009	A	3	2	251.5	0	0	1199	200092	200092	0.005992244	1	69.5	9/9/2009
12	Rice	9-Sep	2009	Sep	9	3	2009	A	3	2	251.5	0	0	5963	1066952	1066952	0.005588817	1	69.5	9/9/2009
13	Row Crop	9-Sep	2009	Sep	9	3	2009	A	3	2	251.5	0	0	174	54305	54305	0.003204125	1	69.5	9/9/2009
99	Suitable-unassigned	9-Sep	2009	Sep	9	3	2009	A	3	2	251.5	0	0	2698	191340	191340	0.014100554	1	69.5	9/9/2009
100	Vineyard/Orchard	9-Sep	2009	Sep	9	3	2009	A	3	2	251.5	0	0	8217	934031	934031	0.008797353	1	69.5	9/9/2009
0	Unsuitable	11-Sep	2011	Sep	9	3	2011	A	3	2	249.5	0	0	30574	321715	321715	0.095034425	1	67.5	9/7/2011
0	Unsuitable	11-Sep	2011	Sep	9	3	2011	B	3.5	2	264.6666667	0	0	30680	321715	321715	0.095363909	1	82.66666667	9/22/2011
1	Grass/Pasture	11-Sep	2011	Sep	9	3	2011	A	3	2	249.5	0	0	924	428238	428238	0.002157679	1	67.5	9/7/2011
1	Grass/Pasture	11-Sep	2011	Sep	9	3	2011	B	3.5	2	264.6666667	0	0	610	428238	428238	0.001424442	1	82.66666667	9/22/2011
3	Corn	11-Sep	2011	Sep	9	3	2011	A	3	2	249.5	0	0	775	52739	52739	0.014695007	1	67.5	9/7/2011
3	Corn	11-Sep	2011	Sep	9	3	2011	B	3.5	2	264.6666667	0	0	563	52739	52739	0.010675212	1	82.66666667	9/22/2011
5	Field Crop	11-Sep	2011	Sep	9	3	2011	A	3	2	249.5	0	0	10571	321165	321165	0.032914545	1	67.5	9/7/2011
5	Field Crop	11-Sep	2011	Sep	9	3	2011	B	3.5	2	264.6666667	0	0	10160	321165	321165	0.031634829	1	82.66666667	9/22/2011
7	Grains	11-Sep	2011	Sep	9	3	2011	A	3	2	249.5	0	0	1604	108163	108163	0.01482947	1	67.5	9/7/2011
7	Grains	11-Sep	2011	Sep	9	3	2011	B	3.5	2	264.6666667	0	0	1431	108163	108163	0.013230032	1	82.66666667	9/22/2011
11	Alfalfa	11-Sep	2011	Sep	9	3	2011	A	3	2	249.5	0	0	4148	200092	200092	0.020730464	1	67.5	9/7/2011
11	Alfalfa	11-Sep	2011	Sep	9	3	2011	B	3.5	2	264.6666667	0	0	2571	200092	200092	0.012849089	1	82.66666667	9/22/2011
12	Rice	11-Sep	2011	Sep	9	3	2011	A	3	2	249.5	0	0	4514	1066952	1066952	0.004230743	1	67.5	9/7/2011
12	Rice	11-Sep	2011	Sep	9	3	2011	B	3.5	2	264.6666667	0	0	3988	1066952	1066952	0.00373775	1	82.66666667	9/22/2011
13	Row Crop	11-Sep	2011	Sep	9	3	2011	A	3	2	249.5	0	0	1823	54305	54305	0.033569653	1	67.5	9/7/2011
13	Row Crop	11-Sep	2011	Sep	9	3	2011	B	3.5	2	264.6666667	0	0	851	54305	54305	0.015670749	1	82.66666667	9/22/2011
99	Suitable-unassigned	11-Sep	2011	Sep	9	3	2011	A	3	2	249.5	0	0	4425	191340	191340	0.023126372	1	67.5	9/7/2011
99	Suitable-unassigned	11-Sep	2011	Sep	9	3	2011	B	3.5	2	264.6666667	0	0	3857	191340	191340	0.020157834	1	82.66666667	9/22/2011
100	Vineyard/Orchard	11-Sep	2011	Sep	9	3	2011	A	3	2	249.5	0	0	8363	934031	934031	0.008953664	1	67.5	9/7/2011
100	Vineyard/Orchard	11-Sep	2011	Sep	9	3	2011	B	3.5	2	264.6666667	0	0	9583	934031	934031	0.010259831	1	82.66666667	9/22/2011
0	Unsuitable	13-Sep	2013	Sep	9	3	2013	A	3	2	251	0	0	24936	309924	321715	0.080458435	0.963349549	69	9/9/2013
1	Grass/Pasture	13-Sep	2013	Sep	9	3	2013	A	3	2	251	0	0	280	401570	428238	0.000697263	0.937726218	69	9/9/2013
3	Corn	13-Sep	2013	Sep	9	3	2013	A	3	2	251	0	0	7	49977	52739	0.000140064	0.947628889	69	9/9/2013
5	Field Crop	13-Sep	2013	Sep	9	3	2013	A	3	2	251	0	0	4121	319339	321165	0.012904781	0.994314449	69	9/9/2013
7	Grains	13-Sep	2013	Sep	9	3	2013	A	3	2	251	0	0	134	106333	108163	0.001260192	0.983081091	69	9/9/2013
11	Alfalfa	13-Sep	2013	Sep	9	3	2013	A	3	2	251	0	0	558	194124	200092	0.002874451	0.97017372	69	9/9/2013
12	Rice	13-Sep	2013	Sep	9	3	2013	A	3	2	251	0	0	1590	1066942	1066952	0.00149024	0.999990628	69	9/9/2013
13	Row Crop	13-Sep	2013	Sep	9	3	2013	A	3	2	251	0	0	3	54305	54305	5.52E-05	1	69	9/9/2013
99	Suitable-unassigned	13-Sep	2013	Sep	9	3	2013	A	3	2	251	0	0	1291	187449	191340	0.006887207	0.979664472	69	9/9/2013
100	Vineyard/Orchard	13-Sep	2013	Sep	9	3	2013	A	3	2	251	0	0	1906	893489	934031	0.00213321	0.956594588	69	9/9/2013
0	Unsuitable	1-Oct	2001	Oct	10	4	2001	B	4.5	2	295.3333333	0	0	35033	180957	321715	0.193598479	0.562476105	113.3333333	10/23/2001
1	Grass/Pasture	1-Oct	2001	Oct	10	4	2001	B	4.5	2	295.3333333	0	0	4013	280462	428238	0.014308534	0.654920862	113.3333333	10/23/2001
3	Corn	1-Oct	2001	Oct	10	4	2001	B	4.5	2	295.3333333	0	0	2310	21215	52739	0.108885223	0.402263979	113.3333333	10/23/2001
5	Field Crop	1-Oct	2001	Oct	10	4	2001	B	4.5	2	295.3333333	0	0	30668	195750	321165	0.156669221	0.60949979	113.3333333	10/23/2001
7	Grains	1-Oct	2001	Oct	10	4	2001	B	4.5	2	295.3333333	0	0	8938	69280	108163	0.129012702	0.640514779	113.3333333	10/23/2001
11	Alfalfa	1-Oct	2001	Oct	10	4	2001	B	4.5	2	295.3333333	0	0	15548	114653	200092	0.135609186	0.573001419	113.3333333	10/23/2001
12	Rice	1-Oct	2001	Oct	10	4	2001	B	4.5	2	295.3333333	0	0	185525	707058	1066952	0.262390073	0.662689606	113.3333333	10/23/2001
13	Row Crop	1-Oct	2001	Oct	10	4	2001	B	4.5	2	295.3333333	0	0	8759	43597	54305	0.200908319	0.80281742	113.3333333	10/23/2001
99	Suitable-unassigned	1-Oct	2001	Oct	10	4	2001	B	4.5	2	295.3333333	0	0	18781	124539	191340	0.150804166	0.650878018	113.3333333	10/23/2001
100	Vineyard/Orchard	1-Oct	2001	Oct	10	4	2001	B	4.5	2	295.3333333	0	0	30501	523418	934031	0.058272738	0.560386111	113.3333333	10/23/2001
0	Unsuitable	2-Oct	2002	Oct	10	4	2002	A	4	2	282.3333333	0	0	34951	321715	321715	0.108639634	1	100.3333333	10/10/2002
0	Unsuitable	2-Oct	2002	Oct	10	4	2002	B	4.5	2	298.3333333	0	0	41625	321715	321715	0.129384704	1	116.3333333	10/26/2002
1	Grass/Pasture	2-Oct	2002	Oct	10	4	2002	A	4	2	282.3333333	0	0	1564	428238	428238	0.003652175	1	100.3333333	10/10/2002
1	Grass/Pasture	2-Oct	2002	Oct	10	4	2002	B	4.5	2	298.3333333	0	0	1532	428238	428238	0.00357745	1	116.3333333	10/26/2002
3	Corn	2-Oct	2002	Oct	10	4	2002	A	4	2	282.3333333	0	0	3211	52739	52739	0.060884734	1	100.3333333	10/10/2002
3	Corn	2-Oct	2002	Oct	10	4	2002	B	4.5	2	298.3333333	0	0	1460	52739	52739	0.027683498	1	116.3333333	10/26/2002
5	Field Crop	2-Oct	2002	Oct	10	4	2002	A	4	2	282.3333333	0	0	25977	321165	321165	0.080883658	1	100.3333333	10/10/2002
5	Field Crop	2-Oct	2002	Oct	10	4	2002	B	4.5	2	298.3333333	0	0	29782	321165	321165	0.092731151	1	116.3333333	10/26/2002
7	Grains	2-Oct	2002	Oct	10	4	2002	A	4	2	282.3333333	0	0	7933	108163	108163	0.07334301	1	100.3333333	10/10/2002
7	Grains	2-Oct	2002	Oct	10	4	2002	B	4.5	2	298.3333333	0	0	4949	108163	108163	0.045755018	1	116.3333333	10/26/2002
11	Alfalfa	2-Oct	2002	Oct	10	4	2002	A	4	2	282.3333333	0	0	15827	200092	200092	0.079098615	1	100.3333333	10/10/2002
11	Alfalfa	2-Oct	2002	Oct	10	4	2002	B	4.5	2	298.3333333	0	0	9482	200092	200092	0.047388201	1	116.3333333	10/26/2002
12	Rice	2-Oct	2002	Oct	10	4	2002	A	4	2	282.3333333	0	0	90966	1066952	1066952	0.085257819	1	100.3333333	10/10/2002
12	Rice	2-Oct	2002	Oct	10	4	2002	B	4.5	2	298.3333333	0	0	269934	1066952	1066952	0.252995449	1	116.3333333	10/26/2002
13	Row Crop	2-Oct	2002	Oct	10	4	2002	A	4	2	282.3333333	0	0	8429	54305	54305	0.15521591	1	100.3333333	10/10/2002
13	Row Crop	2-Oct	2002	Oct	10	4	2002	B	4.5	2	298.3333333	0	0	3208	54305	54305	0.05907375	1	116.3333333	10/26/2002
99	Suitable-unassigned	2-Oct	2002	Oct	10	4	2002	A	4	2	282.3333333	0	0	17468	191340	191340	0.091292986	1	100.3333333	10/10/2002
99	Suitable-unassigned	2-Oct	2002	Oct	10	4	2002	B	4.5	2	298.3333333	0	0	14293	191340	191340	0.074699488	1	116.3333333	10/26/2002
100	Vineyard/Orchard	2-Oct	2002	Oct	10	4	2002	A	4	2	282.3333333	0	0	28019	934031	934031	0.029997934	1	100.3333333	10/10/2002
100	Vineyard/Orchard	2-Oct	2002	Oct	10	4	2002	B	4.5	2	298.3333333	0	0	23797	934031	934031	0.025477741	1	116.3333333	10/26/2002
0	Unsuitable	13-Nov	2013	Nov	11	5	2013	A	5	2	310.5	0	0	38925	309924	321715	0.125595307	0.963349549	128.5	11/7/2013
1	Grass/Pasture	13-Nov	2013	Nov	11	5	2013	A	5	2	310.5	0	0	1242	401570	428238	0.003092861	0.937726218	128.5	11/7/2013
3	Corn	13-Nov	2013	Nov	11	5	2013	A	5	2	310.5	0	0	45	49977	52739	0.000900414	0.947628889	128.5	11/7/2013
5	Field Crop	13-Nov	2013	Nov	11	5	2013	A	5	2	310.5	0	0	24879	319339	321165	0.077907803	0.994314449	128.5	11/7/2013
7	Grains	13-Nov	2013	Nov	11	5	2013	A	5	2	310.5	0	0	424	106333	108163	0.003987473	0.983081091	128.5	11/7/2013
11	Alfalfa	13-Nov	2013	Nov	11	5	2013	A	5	2	310.5	0	0	469	194124	200092	0.002415982	0.97017372	128.5	11/7/2013
12	Rice	13-Nov	2013	Nov	11	5	2013	A	5	2	310.5	0	0	346288	1066942	1066952	0.324561223	0.999990628	128.5	11/7/2013
13	Row Crop	13-Nov	2013	Nov	11	5	2013	A	5	2	310.5	0	0	237	54305	54305	0.004364239	1	128.5	11/7/2013
99	Suitable-unassigned	13-Nov	2013	Nov	11	5	2013	A	5	2	310.5	0	0	8706	187449	191340	0.046444633	0.979664472	128.5	11/7/2013
100	Vineyard/Orchard	13-Nov	2013	Nov	11	5	2013	A	5	2	310.5	0	0	5215	893489	934031	0.00583667	0.956594588	128.5	11/7/2013
0	Unsuitable	14-Jan	2014	Jan	1	7	2013	A	7	3	14	0	0	89550	863259	867523	0.1037348	0.995084857	197	1/15/2014
1	Grass/Pasture	14-Jan	2014	Jan	1	7	2013	A	7	3	14	0	0	2811	619900	625708	0.004534602	0.990717715	197	1/15/2014
3	Corn	14-Jan	2014	Jan	1	7	2013	A	7	3	14	0	0	92	7899	7899	0.011647044	1	197	1/15/2014
5	Field Crop	14-Jan	2014	Jan	1	7	2013	A	7	3	14	0	0	15583	303397	303397	0.051361747	1	197	1/15/2014
7	Grains	14-Jan	2014	Jan	1	7	2013	A	7	3	14	0	0	2317	33544	33544	0.069073456	1	197	1/15/2014
11	Alfalfa	14-Jan	2014	Jan	1	7	2013	A	7	3	14	0	0	283	40255	40265	0.007030183	0.999751645	197	1/15/2014
12	Rice	14-Jan	2014	Jan	1	7	2013	A	7	3	14	0	0	205655	457898	457898	0.449128409	1	197	1/15/2014
13	Row Crop	14-Jan	2014	Jan	1	7	2013	A	7	3	14	0	0	3	246	246	0.012195122	1	197	1/15/2014
99	Suitable-unassigned	14-Jan	2014	Jan	1	7	2013	A	7	3	14	0	0	3121	94958	94962	0.032867162	0.999957878	197	1/15/2014
100	Vineyard/Orchard	14-Jan	2014	Jan	1	7	2013	A	7	3	14	0	0	6063	290598	290723	0.020863874	0.999570037	197	1/15/2014
0	Unsuitable	1-Jun	2001	Jun	6	12	2000	A	12	3	156.6666667	0	0	29550	863259	867523	0.034230747	0.995084857	339.6666667	6/6/2001
0	Unsuitable	1-Jun	2001	Jun	6	12	2000	B	12.5	3	170	0	0	27487	863259	867523	0.031840965	0.995084857	353	6/20/2001
1	Grass/Pasture	1-Jun	2001	Jun	6	12	2000	A	12	3	156.6666667	0	0	5176	619900	625708	0.008349734	0.990717715	339.6666667	6/6/2001
1	Grass/Pasture	1-Jun	2001	Jun	6	12	2000	B	12.5	3	170	0	0	3761	619900	625708	0.006067108	0.990717715	353	6/20/2001
3	Corn	1-Jun	2001	Jun	6	12	2000	A	12	3	156.6666667	0	0	549	7899	7899	0.069502469	1	339.6666667	6/6/2001
3	Corn	1-Jun	2001	Jun	6	12	2000	B	12.5	3	170	0	0	1213	7899	7899	0.153563742	1	353	6/20/2001
5	Field Crop	1-Jun	2001	Jun	6	12	2000	A	12	3	156.6666667	0	0	24334	303397	303397	0.080205144	1	339.6666667	6/6/2001
5	Field Crop	1-Jun	2001	Jun	6	12	2000	B	12.5	3	170	0	0	12307	303397	303397	0.040564013	1	353	6/20/2001
7	Grains	1-Jun	2001	Jun	6	12	2000	A	12	3	156.6666667	0	0	12777	33544	33544	0.380902695	1	339.6666667	6/6/2001
7	Grains	1-Jun	2001	Jun	6	12	2000	B	12.5	3	170	0	0	3352	33544	33544	0.099928452	1	353	6/20/2001
11	Alfalfa	1-Jun	2001	Jun	6	12	2000	A	12	3	156.6666667	0	0	2293	40255	40265	0.056961868	0.999751645	339.6666667	6/6/2001
11	Alfalfa	1-Jun	2001	Jun	6	12	2000	B	12.5	3	170	0	0	1027	40255	40265	0.025512359	0.999751645	353	6/20/2001
12	Rice	1-Jun	2001	Jun	6	12	2000	A	12	3	156.6666667	0	0	160861	457898	457898	0.351303129	1	339.6666667	6/6/2001
12	Rice	1-Jun	2001	Jun	6	12	2000	B	12.5	3	170	0	0	30149	457898	457898	0.065842174	1	353	6/20/2001
13	Row Crop	1-Jun	2001	Jun	6	12	2000	A	12	3	156.6666667	0	0	10	246	246	0.040650407	1	339.6666667	6/6/2001
13	Row Crop	1-Jun	2001	Jun	6	12	2000	B	12.5	3	170	0	0	1	246	246	0.004065041	1	353	6/20/2001
99	Suitable-unassigned	1-Jun	2001	Jun	6	12	2000	A	12	3	156.6666667	0	0	13658	94958	94962	0.14383201	0.999957878	339.6666667	6/6/2001
99	Suitable-unassigned	1-Jun	2001	Jun	6	12	2000	B	12.5	3	170	0	0	4026	94958	94962	0.042397692	0.999957878	353	6/20/2001
100	Vineyard/Orchard	1-Jun	2001	Jun	6	12	2000	A	12	3	156.6666667	0	0	4400	290598	290723	0.015141192	0.999570037	339.6666667	6/6/2001
100	Vineyard/Orchard	1-Jun	2001	Jun	6	12	2000	B	12.5	3	170	0	0	4867	290598	290723	0.016748223	0.999570037	353	6/20/2001
0	Unsuitable	2-Jun	2002	Jun	6	12	2001	B	12.5	3	175.6666667	0	0	29833	863259	867523	0.034558574	0.995084857	358.6666667	6/25/2002
1	Grass/Pasture	2-Jun	2002	Jun	6	12	2001	B	12.5	3	175.6666667	0	0	3194	619900	625708	0.005152444	0.990717715	358.6666667	6/25/2002
3	Corn	2-Jun	2002	Jun	6	12	2001	B	12.5	3	175.6666667	0	0	1333	7899	7899	0.168755539	1	358.6666667	6/25/2002
5	Field Crop	2-Jun	2002	Jun	6	12	2001	B	12.5	3	175.6666667	0	0	13904	303397	303397	0.045827744	1	358.6666667	6/25/2002
7	Grains	2-Jun	2002	Jun	6	12	2001	B	12.5	3	175.6666667	0	0	4495	33544	33544	0.1340031	1	358.6666667	6/25/2002
11	Alfalfa	2-Jun	2002	Jun	6	12	2001	B	12.5	3	175.6666667	0	0	1155	40255	40265	0.028692088	0.999751645	358.6666667	6/25/2002
12	Rice	2-Jun	2002	Jun	6	12	2001	B	12.5	3	175.6666667	0	0	27531	457898	457898	0.060124744	1	358.6666667	6/25/2002
13	Row Crop	2-Jun	2002	Jun	6	12	2001	B	12.5	3	175.6666667	0	0	3	246	246	0.012195122	1	358.6666667	6/25/2002
99	Suitable-unassigned	2-Jun	2002	Jun	6	12	2001	B	12.5	3	175.6666667	0	0	6773	94958	94962	0.071326271	0.999957878	358.6666667	6/25/2002
100	Vineyard/Orchard	2-Jun	2002	Jun	6	12	2001	B	12.5	3	175.6666667	0	0	4721	290598	290723	0.01624581	0.999570037	358.6666667	6/25/2002
0	Unsuitable	4-Jun	2004	Jun	6	12	2003	B	12.5	3	176.3333333	0	0	26167	863259	867523	0.030311876	0.995084857	359.3333333	6/25/2004
1	Grass/Pasture	4-Jun	2004	Jun	6	12	2003	B	12.5	3	176.3333333	0	0	1786	619900	625708	0.00288111	0.990717715	359.3333333	6/25/2004
3	Corn	4-Jun	2004	Jun	6	12	2003	B	12.5	3	176.3333333	0	0	712	7899	7899	0.090137992	1	359.3333333	6/25/2004
5	Field Crop	4-Jun	2004	Jun	6	12	2003	B	12.5	3	176.3333333	0	0	7401	303397	303397	0.024393781	1	359.3333333	6/25/2004
7	Grains	4-Jun	2004	Jun	6	12	2003	B	12.5	3	176.3333333	0	0	798	33544	33544	0.023789649	1	359.3333333	6/25/2004
11	Alfalfa	4-Jun	2004	Jun	6	12	2003	B	12.5	3	176.3333333	0	0	552	40255	40265	0.013712582	0.999751645	359.3333333	6/25/2004
12	Rice	4-Jun	2004	Jun	6	12	2003	B	12.5	3	176.3333333	0	0	15598	457898	457898	0.034064355	1	359.3333333	6/25/2004
13	Row Crop	4-Jun	2004	Jun	6	12	2003	B	12.5	3	176.3333333	0	0	18	246	246	0.073170732	1	359.3333333	6/25/2004
99	Suitable-unassigned	4-Jun	2004	Jun	6	12	2003	B	12.5	3	176.3333333	0	0	2153	94958	94962	0.022673182	0.999957878	359.3333333	6/25/2004
100	Vineyard/Orchard	4-Jun	2004	Jun	6	12	2003	B	12.5	3	176.3333333	0	0	2972	290598	290723	0.010227187	0.999570037	359.3333333	6/25/2004
0	Unsuitable	6-Jun	2006	Jun	6	12	2005	B	12.5	3	170.6666667	0	0	33581	863259	867523	0.038900261	0.995084857	353.6666667	6/20/2006
1	Grass/Pasture	6-Jun	2006	Jun	6	12	2005	B	12.5	3	170.6666667	0	0	2469	619900	625708	0.0039829	0.990717715	353.6666667	6/20/2006
3	Corn	6-Jun	2006	Jun	6	12	2005	B	12.5	3	170.6666667	0	0	1078	7899	7899	0.136472971	1	353.6666667	6/20/2006
5	Field Crop	6-Jun	2006	Jun	6	12	2005	B	12.5	3	170.6666667	0	0	17250	303397	303397	0.056856198	1	353.6666667	6/20/2006
7	Grains	6-Jun	2006	Jun	6	12	2005	B	12.5	3	170.6666667	0	0	946	33544	33544	0.028201765	1	353.6666667	6/20/2006
11	Alfalfa	6-Jun	2006	Jun	6	12	2005	B	12.5	3	170.6666667	0	0	1214	40255	40265	0.030157744	0.999751645	353.6666667	6/20/2006
12	Rice	6-Jun	2006	Jun	6	12	2005	B	12.5	3	170.6666667	0	0	208294	457898	457898	0.454891701	1	353.6666667	6/20/2006
13	Row Crop	6-Jun	2006	Jun	6	12	2005	B	12.5	3	170.6666667	0	0	28	246	246	0.113821138	1	353.6666667	6/20/2006
99	Suitable-unassigned	6-Jun	2006	Jun	6	12	2005	B	12.5	3	170.6666667	0	0	9998	94958	94962	0.105288654	0.999957878	353.6666667	6/20/2006
100	Vineyard/Orchard	6-Jun	2006	Jun	6	12	2005	B	12.5	3	170.6666667	0	0	4603	290598	290723	0.015839751	0.999570037	353.6666667	6/20/2006
0	Unsuitable	10-Jun	2010	Jun	6	12	2009	B	12.5	3	176.3333333	0	0	34033	863259	867523	0.039423858	0.995084857	359.3333333	6/26/2010
1	Grass/Pasture	10-Jun	2010	Jun	6	12	2009	B	12.5	3	176.3333333	0	0	1437	619900	625708	0.002318116	0.990717715	359.3333333	6/26/2010
3	Corn	10-Jun	2010	Jun	6	12	2009	B	12.5	3	176.3333333	0	0	969	7899	7899	0.122673756	1	359.3333333	6/26/2010
5	Field Crop	10-Jun	2010	Jun	6	12	2009	B	12.5	3	176.3333333	0	0	12206	303397	303397	0.040231116	1	359.3333333	6/26/2010
7	Grains	10-Jun	2010	Jun	6	12	2009	B	12.5	3	176.3333333	0	0	745	33544	33544	0.022209635	1	359.3333333	6/26/2010
11	Alfalfa	10-Jun	2010	Jun	6	12	2009	B	12.5	3	176.3333333	0	0	172	40255	40265	0.004272761	0.999751645	359.3333333	6/26/2010
12	Rice	10-Jun	2010	Jun	6	12	2009	B	12.5	3	176.3333333	0	0	130716	457898	457898	0.28546969	1	359.3333333	6/26/2010
13	Row Crop	10-Jun	2010	Jun	6	12	2009	B	12.5	3	176.3333333	0	0	25	246	246	0.101626016	1	359.3333333	6/26/2010
99	Suitable-unassigned	10-Jun	2010	Jun	6	12	2009	B	12.5	3	176.3333333	0	0	6600	94958	94962	0.069504412	0.999957878	359.3333333	6/26/2010
100	Vineyard/Orchard	10-Jun	2010	Jun	6	12	2009	B	12.5	3	176.3333333	0	0	4121	290598	290723	0.014181102	0.999570037	359.3333333	6/26/2010
0	Unsuitable	2-Jul	2002	Jul	7	1	2002	A	1	3	189	0	0	35790	684931	867523	0.052253439	0.789524889	7	7/9/2002
0	Unsuitable	2-Jul	2002	Jul	7	1	2002	B	1.5	3	202.3333333	0	0	35790	684931	867523	0.052253439	0.789524889	20.33333333	7/22/2002
1	Grass/Pasture	2-Jul	2002	Jul	7	1	2002	A	1	3	189	0	0	3020	339366	625708	0.008898947	0.542371202	7	7/9/2002
1	Grass/Pasture	2-Jul	2002	Jul	7	1	2002	B	1.5	3	202.3333333	0	0	3020	339366	625708	0.008898947	0.542371202	20.33333333	7/22/2002
3	Corn	2-Jul	2002	Jul	7	1	2002	A	1	3	189	0	0	22	3282	7899	0.00670323	0.415495632	7	7/9/2002
3	Corn	2-Jul	2002	Jul	7	1	2002	B	1.5	3	202.3333333	0	0	22	3282	7899	0.00670323	0.415495632	20.33333333	7/22/2002
5	Field Crop	2-Jul	2002	Jul	7	1	2002	A	1	3	189	0	0	6939	207733	303397	0.033403455	0.684690356	7	7/9/2002
5	Field Crop	2-Jul	2002	Jul	7	1	2002	B	1.5	3	202.3333333	0	0	6939	207733	303397	0.033403455	0.684690356	20.33333333	7/22/2002
7	Grains	2-Jul	2002	Jul	7	1	2002	A	1	3	189	0	0	2333	30804	33544	0.075736917	0.918316241	7	7/9/2002
7	Grains	2-Jul	2002	Jul	7	1	2002	B	1.5	3	202.3333333	0	0	2333	30804	33544	0.075736917	0.918316241	20.33333333	7/22/2002
11	Alfalfa	2-Jul	2002	Jul	7	1	2002	A	1	3	189	0	0	1232	34441	40265	0.035771319	0.855358252	7	7/9/2002
11	Alfalfa	2-Jul	2002	Jul	7	1	2002	B	1.5	3	202.3333333	0	0	1232	34441	40265	0.035771319	0.855358252	20.33333333	7/22/2002
12	Rice	2-Jul	2002	Jul	7	1	2002	A	1	3	189	0	0	29986	279297	457898	0.107362413	0.609954619	7	7/9/2002
12	Rice	2-Jul	2002	Jul	7	1	2002	B	1.5	3	202.3333333	0	0	29986	279297	457898	0.107362413	0.609954619	20.33333333	7/22/2002
13	Row Crop	2-Jul	2002	Jul	7	1	2002	A	1	3	189	0	0	0	244	246	0	0.991869919	7	7/9/2002
13	Row Crop	2-Jul	2002	Jul	7	1	2002	B	1.5	3	202.3333333	0	0	0	244	246	0	0.991869919	20.33333333	7/22/2002
99	Suitable-unassigned	2-Jul	2002	Jul	7	1	2002	A	1	3	189	0	0	2281	72145	94962	0.031616883	0.759724943	7	7/9/2002
99	Suitable-unassigned	2-Jul	2002	Jul	7	1	2002	B	1.5	3	202.3333333	0	0	2281	72145	94962	0.031616883	0.759724943	20.33333333	7/22/2002
100	Vineyard/Orchard	2-Jul	2002	Jul	7	1	2002	A	1	3	189	0	0	2123	117292	290723	0.018100126	0.403449331	7	7/9/2002
100	Vineyard/Orchard	2-Jul	2002	Jul	7	1	2002	B	1.5	3	202.3333333	0	0	2123	117292	290723	0.018100126	0.403449331	20.33333333	7/22/2002
0	Unsuitable	3-Jul	2003	Jul	7	1	2003	A	1	3	189.3333333	0	0	29853	867523	867523	0.034411768	1	7.333333333	7/9/2003
1	Grass/Pasture	3-Jul	2003	Jul	7	1	2003	A	1	3	189.3333333	0	0	2259	625708	625708	0.00361031	1	7.333333333	7/9/2003
3	Corn	3-Jul	2003	Jul	7	1	2003	A	1	3	189.3333333	0	0	663	7899	7899	0.083934675	1	7.333333333	7/9/2003
5	Field Crop	3-Jul	2003	Jul	7	1	2003	A	1	3	189.3333333	0	0	10102	303397	303397	0.033296308	1	7.333333333	7/9/2003
7	Grains	3-Jul	2003	Jul	7	1	2003	A	1	3	189.3333333	0	0	1152	33544	33544	0.034342953	1	7.333333333	7/9/2003
11	Alfalfa	3-Jul	2003	Jul	7	1	2003	A	1	3	189.3333333	0	0	430	40265	40265	0.01067925	1	7.333333333	7/9/2003
12	Rice	3-Jul	2003	Jul	7	1	2003	A	1	3	189.3333333	0	0	18762	457898	457898	0.040974191	1	7.333333333	7/9/2003
13	Row Crop	3-Jul	2003	Jul	7	1	2003	A	1	3	189.3333333	0	0	33	246	246	0.134146341	1	7.333333333	7/9/2003
99	Suitable-unassigned	3-Jul	2003	Jul	7	1	2003	A	1	3	189.3333333	0	0	2276	94962	94962	0.023967482	1	7.333333333	7/9/2003
100	Vineyard/Orchard	3-Jul	2003	Jul	7	1	2003	A	1	3	189.3333333	0	0	4338	290723	290723	0.01492142	1	7.333333333	7/9/2003
0	Unsuitable	4-Jul	2004	Jul	7	1	2004	A	1	3	192.3333333	0	0	32998	867523	867523	0.038037032	1	9.333333333	7/11/2004
1	Grass/Pasture	4-Jul	2004	Jul	7	1	2004	A	1	3	192.3333333	0	0	2268	625708	625708	0.003624694	1	9.333333333	7/11/2004
3	Corn	4-Jul	2004	Jul	7	1	2004	A	1	3	192.3333333	0	0	440	7899	7899	0.055703254	1	9.333333333	7/11/2004
5	Field Crop	4-Jul	2004	Jul	7	1	2004	A	1	3	192.3333333	0	0	8233	303397	303397	0.027136063	1	9.333333333	7/11/2004
7	Grains	4-Jul	2004	Jul	7	1	2004	A	1	3	192.3333333	0	0	387	33544	33544	0.011537086	1	9.333333333	7/11/2004
11	Alfalfa	4-Jul	2004	Jul	7	1	2004	A	1	3	192.3333333	0	0	340	40265	40265	0.008444058	1	9.333333333	7/11/2004
12	Rice	4-Jul	2004	Jul	7	1	2004	A	1	3	192.3333333	0	0	5463	457898	457898	0.011930605	1	9.333333333	7/11/2004
13	Row Crop	4-Jul	2004	Jul	7	1	2004	A	1	3	192.3333333	0	0	7	246	246	0.028455285	1	9.333333333	7/11/2004
99	Suitable-unassigned	4-Jul	2004	Jul	7	1	2004	A	1	3	192.3333333	0	0	1480	94962	94962	0.015585181	1	9.333333333	7/11/2004
100	Vineyard/Orchard	4-Jul	2004	Jul	7	1	2004	A	1	3	192.3333333	0	0	3822	290723	290723	0.013146535	1	9.333333333	7/11/2004
0	Unsuitable	5-Jul	2005	Jul	7	1	2005	B	1.5	3	205	0	0	26508	867523	867523	0.030555962	1	23	7/25/2005
1	Grass/Pasture	5-Jul	2005	Jul	7	1	2005	B	1.5	3	205	0	0	1606	625708	625708	0.002566692	1	23	7/25/2005
3	Corn	5-Jul	2005	Jul	7	1	2005	B	1.5	3	205	0	0	266	7899	7899	0.033675149	1	23	7/25/2005
5	Field Crop	5-Jul	2005	Jul	7	1	2005	B	1.5	3	205	0	0	4916	303397	303397	0.016203193	1	23	7/25/2005
7	Grains	5-Jul	2005	Jul	7	1	2005	B	1.5	3	205	0	0	352	33544	33544	0.01049368	1	23	7/25/2005
11	Alfalfa	5-Jul	2005	Jul	7	1	2005	B	1.5	3	205	0	0	362	40265	40265	0.008990438	1	23	7/25/2005
12	Rice	5-Jul	2005	Jul	7	1	2005	B	1.5	3	205	0	0	5304	457898	457898	0.011583366	1	23	7/25/2005
13	Row Crop	5-Jul	2005	Jul	7	1	2005	B	1.5	3	205	0	0	1	246	246	0.004065041	1	23	7/25/2005
99	Suitable-unassigned	5-Jul	2005	Jul	7	1	2005	B	1.5	3	205	0	0	959	94962	94962	0.010098776	1	23	7/25/2005
100	Vineyard/Orchard	5-Jul	2005	Jul	7	1	2005	B	1.5	3	205	0	0	2123	290723	290723	0.007302484	1	23	7/25/2005
0	Unsuitable	6-Jul	2006	Jul	7	1	2006	B	1.5	3	202.6666667	0	0	34029	867523	867523	0.039225473	1	20.66666667	7/22/2006
1	Grass/Pasture	6-Jul	2006	Jul	7	1	2006	B	1.5	3	202.6666667	0	0	1630	625708	625708	0.002605049	1	20.66666667	7/22/2006
3	Corn	6-Jul	2006	Jul	7	1	2006	B	1.5	3	202.6666667	0	0	530	7899	7899	0.067097101	1	20.66666667	7/22/2006
5	Field Crop	6-Jul	2006	Jul	7	1	2006	B	1.5	3	202.6666667	0	0	6375	303397	303397	0.021012073	1	20.66666667	7/22/2006
7	Grains	6-Jul	2006	Jul	7	1	2006	B	1.5	3	202.6666667	0	0	291	33544	33544	0.008675173	1	20.66666667	7/22/2006
11	Alfalfa	6-Jul	2006	Jul	7	1	2006	B	1.5	3	202.6666667	0	0	474	40265	40265	0.01177201	1	20.66666667	7/22/2006
12	Rice	6-Jul	2006	Jul	7	1	2006	B	1.5	3	202.6666667	0	0	9856	457898	457898	0.021524444	1	20.66666667	7/22/2006
13	Row Crop	6-Jul	2006	Jul	7	1	2006	B	1.5	3	202.6666667	0	0	14	246	246	0.056910569	1	20.66666667	7/22/2006
99	Suitable-unassigned	6-Jul	2006	Jul	7	1	2006	B	1.5	3	202.6666667	0	0	1671	94962	94962	0.017596512	1	20.66666667	7/22/2006
100	Vineyard/Orchard	6-Jul	2006	Jul	7	1	2006	B	1.5	3	202.6666667	0	0	5209	290723	290723	0.017917399	1	20.66666667	7/22/2006
0	Unsuitable	7-Jul	2007	Jul	7	1	2007	A	1	3	189.6666667	0	0	33150	867523	867523	0.038212243	1	7.666666667	7/9/2007
0	Unsuitable	7-Jul	2007	Jul	7	1	2007	B	1.5	3	205.6666667	0	0	31938	867523	867523	0.036815162	1	23.66666667	7/25/2007
1	Grass/Pasture	7-Jul	2007	Jul	7	1	2007	A	1	3	189.6666667	0	0	1251	625708	625708	0.001999335	1	7.666666667	7/9/2007
1	Grass/Pasture	7-Jul	2007	Jul	7	1	2007	B	1.5	3	205.6666667	0	0	1430	625708	625708	0.002285411	1	23.66666667	7/25/2007
3	Corn	7-Jul	2007	Jul	7	1	2007	A	1	3	189.6666667	0	0	639	7899	7899	0.080896316	1	7.666666667	7/9/2007
3	Corn	7-Jul	2007	Jul	7	1	2007	B	1.5	3	205.6666667	0	0	108	7899	7899	0.013672617	1	23.66666667	7/25/2007
5	Field Crop	7-Jul	2007	Jul	7	1	2007	A	1	3	189.6666667	0	0	7079	303397	303397	0.023332465	1	7.666666667	7/9/2007
5	Field Crop	7-Jul	2007	Jul	7	1	2007	B	1.5	3	205.6666667	0	0	6550	303397	303397	0.021588875	1	23.66666667	7/25/2007
7	Grains	7-Jul	2007	Jul	7	1	2007	A	1	3	189.6666667	0	0	201	33544	33544	0.00599213	1	7.666666667	7/9/2007
7	Grains	7-Jul	2007	Jul	7	1	2007	B	1.5	3	205.6666667	0	0	186	33544	33544	0.005544956	1	23.66666667	7/25/2007
11	Alfalfa	7-Jul	2007	Jul	7	1	2007	A	1	3	189.6666667	0	0	458	40265	40265	0.011374643	1	7.666666667	7/9/2007
11	Alfalfa	7-Jul	2007	Jul	7	1	2007	B	1.5	3	205.6666667	0	0	303	40265	40265	0.007525146	1	23.66666667	7/25/2007
12	Rice	7-Jul	2007	Jul	7	1	2007	A	1	3	189.6666667	0	0	12495	457898	457898	0.027287737	1	7.666666667	7/9/2007
12	Rice	7-Jul	2007	Jul	7	1	2007	B	1.5	3	205.6666667	0	0	5892	457898	457898	0.012867495	1	23.66666667	7/25/2007
13	Row Crop	7-Jul	2007	Jul	7	1	2007	A	1	3	189.6666667	0	0	11	246	246	0.044715447	1	7.666666667	7/9/2007
13	Row Crop	7-Jul	2007	Jul	7	1	2007	B	1.5	3	205.6666667	0	0	6	246	246	0.024390244	1	23.66666667	7/25/2007
99	Suitable-unassigned	7-Jul	2007	Jul	7	1	2007	A	1	3	189.6666667	0	0	1418	94962	94962	0.014932289	1	7.666666667	7/9/2007
99	Suitable-unassigned	7-Jul	2007	Jul	7	1	2007	B	1.5	3	205.6666667	0	0	1558	94962	94962	0.016406563	1	23.66666667	7/25/2007
100	Vineyard/Orchard	7-Jul	2007	Jul	7	1	2007	A	1	3	189.6666667	0	0	3721	290723	290723	0.012799125	1	7.666666667	7/9/2007
100	Vineyard/Orchard	7-Jul	2007	Jul	7	1	2007	B	1.5	3	205.6666667	0	0	3646	290723	290723	0.012541147	1	23.66666667	7/25/2007
0	Unsuitable	8-Jul	2008	Jul	7	1	2008	A	1	3	190	0	0	46529	867523	867523	0.053634313	1	7	7/9/2008
0	Unsuitable	8-Jul	2008	Jul	7	1	2008	B	1.5	3	203.3333333	0	0	33294	867523	867523	0.038378233	1	20.33333333	7/22/2008
1	Grass/Pasture	8-Jul	2008	Jul	7	1	2008	A	1	3	190	0	0	3446	625708	625708	0.005507361	1	7	7/9/2008
1	Grass/Pasture	8-Jul	2008	Jul	7	1	2008	B	1.5	3	203.3333333	0	0	1170	625708	625708	0.001869882	1	20.33333333	7/22/2008
3	Corn	8-Jul	2008	Jul	7	1	2008	A	1	3	190	0	0	496	7899	7899	0.062792759	1	7	7/9/2008
3	Corn	8-Jul	2008	Jul	7	1	2008	B	1.5	3	203.3333333	0	0	175	7899	7899	0.022154703	1	20.33333333	7/22/2008
5	Field Crop	8-Jul	2008	Jul	7	1	2008	A	1	3	190	0	0	11198	303397	303397	0.036908737	1	7	7/9/2008
5	Field Crop	8-Jul	2008	Jul	7	1	2008	B	1.5	3	203.3333333	0	0	5476	303397	303397	0.018048959	1	20.33333333	7/22/2008
7	Grains	8-Jul	2008	Jul	7	1	2008	A	1	3	190	0	0	484	33544	33544	0.01442881	1	7	7/9/2008
7	Grains	8-Jul	2008	Jul	7	1	2008	B	1.5	3	203.3333333	0	0	292	33544	33544	0.008704984	1	20.33333333	7/22/2008
11	Alfalfa	8-Jul	2008	Jul	7	1	2008	A	1	3	190	0	0	529	40265	40265	0.013137961	1	7	7/9/2008
11	Alfalfa	8-Jul	2008	Jul	7	1	2008	B	1.5	3	203.3333333	0	0	613	40265	40265	0.01522414	1	20.33333333	7/22/2008
12	Rice	8-Jul	2008	Jul	7	1	2008	A	1	3	190	0	0	13260	457898	457898	0.028958414	1	7	7/9/2008
12	Rice	8-Jul	2008	Jul	7	1	2008	B	1.5	3	203.3333333	0	0	4026	457898	457898	0.008792351	1	20.33333333	7/22/2008
13	Row Crop	8-Jul	2008	Jul	7	1	2008	A	1	3	190	0	0	6	246	246	0.024390244	1	7	7/9/2008
13	Row Crop	8-Jul	2008	Jul	7	1	2008	B	1.5	3	203.3333333	0	0	0	246	246	0	1	20.33333333	7/22/2008
99	Suitable-unassigned	8-Jul	2008	Jul	7	1	2008	A	1	3	190	0	0	2499	94962	94962	0.026315789	1	7	7/9/2008
99	Suitable-unassigned	8-Jul	2008	Jul	7	1	2008	B	1.5	3	203.3333333	0	0	1314	94962	94962	0.013837114	1	20.33333333	7/22/2008
100	Vineyard/Orchard	8-Jul	2008	Jul	7	1	2008	A	1	3	190	0	0	5382	290723	290723	0.018512467	1	7	7/9/2008
100	Vineyard/Orchard	8-Jul	2008	Jul	7	1	2008	B	1.5	3	203.3333333	0	0	2929	290723	290723	0.010074882	1	20.33333333	7/22/2008
0	Unsuitable	9-Jul	2009	Jul	7	1	2009	A	1	3	189.3333333	0	0	28260	867523	867523	0.032575505	1	7.333333333	7/9/2009
0	Unsuitable	9-Jul	2009	Jul	7	1	2009	B	1.5	3	205.3333333	0	0	35171	867523	867523	0.040541865	1	23.33333333	7/25/2009
1	Grass/Pasture	9-Jul	2009	Jul	7	1	2009	A	1	3	189.3333333	0	0	964	625708	625708	0.001540655	1	7.333333333	7/9/2009
1	Grass/Pasture	9-Jul	2009	Jul	7	1	2009	B	1.5	3	205.3333333	0	0	1511	625708	625708	0.002414864	1	23.33333333	7/25/2009
3	Corn	9-Jul	2009	Jul	7	1	2009	A	1	3	189.3333333	0	0	383	7899	7899	0.04848715	1	7.333333333	7/9/2009
3	Corn	9-Jul	2009	Jul	7	1	2009	B	1.5	3	205.3333333	0	0	257	7899	7899	0.032535764	1	23.33333333	7/25/2009
5	Field Crop	9-Jul	2009	Jul	7	1	2009	A	1	3	189.3333333	0	0	7088	303397	303397	0.023362129	1	7.333333333	7/9/2009
5	Field Crop	9-Jul	2009	Jul	7	1	2009	B	1.5	3	205.3333333	0	0	7305	303397	303397	0.024077364	1	23.33333333	7/25/2009
7	Grains	9-Jul	2009	Jul	7	1	2009	A	1	3	189.3333333	0	0	184	33544	33544	0.005485333	1	7.333333333	7/9/2009
7	Grains	9-Jul	2009	Jul	7	1	2009	B	1.5	3	205.3333333	0	0	151	33544	33544	0.00450155	1	23.33333333	7/25/2009
11	Alfalfa	9-Jul	2009	Jul	7	1	2009	A	1	3	189.3333333	0	0	144	40265	40265	0.003576307	1	7.333333333	7/9/2009
11	Alfalfa	9-Jul	2009	Jul	7	1	2009	B	1.5	3	205.3333333	0	0	416	40265	40265	0.010331553	1	23.33333333	7/25/2009
12	Rice	9-Jul	2009	Jul	7	1	2009	A	1	3	189.3333333	0	0	5089	457898	457898	0.011113829	1	7.333333333	7/9/2009
12	Rice	9-Jul	2009	Jul	7	1	2009	B	1.5	3	205.3333333	0	0	3746	457898	457898	0.008180861	1	23.33333333	7/25/2009
13	Row Crop	9-Jul	2009	Jul	7	1	2009	A	1	3	189.3333333	0	0	4	246	246	0.016260163	1	7.333333333	7/9/2009
13	Row Crop	9-Jul	2009	Jul	7	1	2009	B	1.5	3	205.3333333	0	0	3	246	246	0.012195122	1	23.33333333	7/25/2009
99	Suitable-unassigned	9-Jul	2009	Jul	7	1	2009	A	1	3	189.3333333	0	0	1462	94962	94962	0.015395632	1	7.333333333	7/9/2009
99	Suitable-unassigned	9-Jul	2009	Jul	7	1	2009	B	1.5	3	205.3333333	0	0	1161	94962	94962	0.012225943	1	23.33333333	7/25/2009
100	Vineyard/Orchard	9-Jul	2009	Jul	7	1	2009	A	1	3	189.3333333	0	0	2505	290723	290723	0.008616449	1	7.333333333	7/9/2009
100	Vineyard/Orchard	9-Jul	2009	Jul	7	1	2009	B	1.5	3	205.3333333	0	0	2634	290723	290723	0.009060171	1	23.33333333	7/25/2009
0	Unsuitable	10-Jul	2010	Jul	7	1	2010	B	1.5	3	208.3333333	0	0	33872	867523	867523	0.039044498	1	26.33333333	7/28/2010
1	Grass/Pasture	10-Jul	2010	Jul	7	1	2010	B	1.5	3	208.3333333	0	0	1068	625708	625708	0.001706866	1	26.33333333	7/28/2010
3	Corn	10-Jul	2010	Jul	7	1	2010	B	1.5	3	208.3333333	0	0	247	7899	7899	0.031269781	1	26.33333333	7/28/2010
5	Field Crop	10-Jul	2010	Jul	7	1	2010	B	1.5	3	208.3333333	0	0	8124	303397	303397	0.026776797	1	26.33333333	7/28/2010
7	Grains	10-Jul	2010	Jul	7	1	2010	B	1.5	3	208.3333333	0	0	170	33544	33544	0.00506797	1	26.33333333	7/28/2010
11	Alfalfa	10-Jul	2010	Jul	7	1	2010	B	1.5	3	208.3333333	0	0	251	40265	40265	0.006233702	1	26.33333333	7/28/2010
12	Rice	10-Jul	2010	Jul	7	1	2010	B	1.5	3	208.3333333	0	0	4259	457898	457898	0.009301198	1	26.33333333	7/28/2010
13	Row Crop	10-Jul	2010	Jul	7	1	2010	B	1.5	3	208.3333333	0	0	6	246	246	0.024390244	1	26.33333333	7/28/2010
99	Suitable-unassigned	10-Jul	2010	Jul	7	1	2010	B	1.5	3	208.3333333	0	0	1523	94962	94962	0.016037994	1	26.33333333	7/28/2010
100	Vineyard/Orchard	10-Jul	2010	Jul	7	1	2010	B	1.5	3	208.3333333	0	0	3579	290723	290723	0.012310687	1	26.33333333	7/28/2010
0	Unsuitable	1-Aug	2001	Aug	8	2	2001	B	2.5	3	236.6666667	0	0	31784	867523	867523	0.036637645	1	54.66666667	8/25/2001
1	Grass/Pasture	1-Aug	2001	Aug	8	2	2001	B	2.5	3	236.6666667	0	0	1958	625708	625708	0.003129255	1	54.66666667	8/25/2001
3	Corn	1-Aug	2001	Aug	8	2	2001	B	2.5	3	236.6666667	0	0	31	7899	7899	0.003924547	1	54.66666667	8/25/2001
5	Field Crop	1-Aug	2001	Aug	8	2	2001	B	2.5	3	236.6666667	0	0	5651	303397	303397	0.018625761	1	54.66666667	8/25/2001
7	Grains	1-Aug	2001	Aug	8	2	2001	B	2.5	3	236.6666667	0	0	264	33544	33544	0.00787026	1	54.66666667	8/25/2001
11	Alfalfa	1-Aug	2001	Aug	8	2	2001	B	2.5	3	236.6666667	0	0	605	40265	40265	0.015025456	1	54.66666667	8/25/2001
12	Rice	1-Aug	2001	Aug	8	2	2001	B	2.5	3	236.6666667	0	0	6651	457898	457898	0.014525069	1	54.66666667	8/25/2001
13	Row Crop	1-Aug	2001	Aug	8	2	2001	B	2.5	3	236.6666667	0	0	5	246	246	0.020325203	1	54.66666667	8/25/2001
99	Suitable-unassigned	1-Aug	2001	Aug	8	2	2001	B	2.5	3	236.6666667	0	0	1473	94962	94962	0.015511468	1	54.66666667	8/25/2001
100	Vineyard/Orchard	1-Aug	2001	Aug	8	2	2001	B	2.5	3	236.6666667	0	0	2868	290723	290723	0.009865061	1	54.66666667	8/25/2001
0	Unsuitable	2-Aug	2002	Aug	8	2	2002	A	2	3	218.3333333	0	0	31555	867523	867523	0.036373675	1	36.33333333	8/7/2002
1	Grass/Pasture	2-Aug	2002	Aug	8	2	2002	A	2	3	218.3333333	0	0	1689	625708	625708	0.002699342	1	36.33333333	8/7/2002
3	Corn	2-Aug	2002	Aug	8	2	2002	A	2	3	218.3333333	0	0	5	7899	7899	0.000632992	1	36.33333333	8/7/2002
5	Field Crop	2-Aug	2002	Aug	8	2	2002	A	2	3	218.3333333	0	0	6487	303397	303397	0.021381227	1	36.33333333	8/7/2002
7	Grains	2-Aug	2002	Aug	8	2	2002	A	2	3	218.3333333	0	0	239	33544	33544	0.00712497	1	36.33333333	8/7/2002
11	Alfalfa	2-Aug	2002	Aug	8	2	2002	A	2	3	218.3333333	0	0	287	40265	40265	0.007127778	1	36.33333333	8/7/2002
12	Rice	2-Aug	2002	Aug	8	2	2002	A	2	3	218.3333333	0	0	3507	457898	457898	0.007658911	1	36.33333333	8/7/2002
13	Row Crop	2-Aug	2002	Aug	8	2	2002	A	2	3	218.3333333	0	0	0	246	246	0	1	36.33333333	8/7/2002
99	Suitable-unassigned	2-Aug	2002	Aug	8	2	2002	A	2	3	218.3333333	0	0	1075	94962	94962	0.011320318	1	36.33333333	8/7/2002
100	Vineyard/Orchard	2-Aug	2002	Aug	8	2	2002	A	2	3	218.3333333	0	0	3033	290723	290723	0.010432611	1	36.33333333	8/7/2002
0	Unsuitable	4-Aug	2004	Aug	8	2	2004	A	2	3	222.5	0	0	35150	867523	867523	0.040517658	1	39.5	8/10/2004
0	Unsuitable	4-Aug	2004	Aug	8	2	2004	B	2.5	3	238.5	0	0	31254	867523	867523	0.036026711	1	55.5	8/26/2004
1	Grass/Pasture	4-Aug	2004	Aug	8	2	2004	A	2	3	222.5	0	0	2428	625708	625708	0.003880404	1	39.5	8/10/2004
1	Grass/Pasture	4-Aug	2004	Aug	8	2	2004	B	2.5	3	238.5	0	0	2196	625708	625708	0.003509624	1	55.5	8/26/2004
3	Corn	4-Aug	2004	Aug	8	2	2004	A	2	3	222.5	0	0	221	7899	7899	0.027978225	1	39.5	8/10/2004
3	Corn	4-Aug	2004	Aug	8	2	2004	B	2.5	3	238.5	0	0	157	7899	7899	0.019875934	1	55.5	8/26/2004
5	Field Crop	4-Aug	2004	Aug	8	2	2004	A	2	3	222.5	0	0	6769	303397	303397	0.022310702	1	39.5	8/10/2004
5	Field Crop	4-Aug	2004	Aug	8	2	2004	B	2.5	3	238.5	0	0	5450	303397	303397	0.017963263	1	55.5	8/26/2004
7	Grains	4-Aug	2004	Aug	8	2	2004	A	2	3	222.5	0	0	286	33544	33544	0.008526115	1	39.5	8/10/2004
7	Grains	4-Aug	2004	Aug	8	2	2004	B	2.5	3	238.5	0	0	232	33544	33544	0.006916289	1	55.5	8/26/2004
11	Alfalfa	4-Aug	2004	Aug	8	2	2004	A	2	3	222.5	0	0	757	40265	40265	0.018800447	1	39.5	8/10/2004
11	Alfalfa	4-Aug	2004	Aug	8	2	2004	B	2.5	3	238.5	0	0	274	40265	40265	0.006804917	1	55.5	8/26/2004
12	Rice	4-Aug	2004	Aug	8	2	2004	A	2	3	222.5	0	0	3531	457898	457898	0.007711324	1	39.5	8/10/2004
12	Rice	4-Aug	2004	Aug	8	2	2004	B	2.5	3	238.5	0	0	3333	457898	457898	0.007278914	1	55.5	8/26/2004
13	Row Crop	4-Aug	2004	Aug	8	2	2004	A	2	3	222.5	0	0	3	246	246	0.012195122	1	39.5	8/10/2004
13	Row Crop	4-Aug	2004	Aug	8	2	2004	B	2.5	3	238.5	0	0	2	246	246	0.008130081	1	55.5	8/26/2004
99	Suitable-unassigned	4-Aug	2004	Aug	8	2	2004	A	2	3	222.5	0	0	1242	94962	94962	0.013078916	1	39.5	8/10/2004
99	Suitable-unassigned	4-Aug	2004	Aug	8	2	2004	B	2.5	3	238.5	0	0	1037	94962	94962	0.010920158	1	55.5	8/26/2004
100	Vineyard/Orchard	4-Aug	2004	Aug	8	2	2004	A	2	3	222.5	0	0	2761	290723	290723	0.009497013	1	39.5	8/10/2004
100	Vineyard/Orchard	4-Aug	2004	Aug	8	2	2004	B	2.5	3	238.5	0	0	2959	290723	290723	0.010178073	1	55.5	8/26/2004
0	Unsuitable	5-Aug	2005	Aug	8	2	2005	B	2.5	3	231.6666667	0	0	20676	366524	867523	0.05641104	0.42249485	49.66666667	8/20/2005
1	Grass/Pasture	5-Aug	2005	Aug	8	2	2005	B	2.5	3	231.6666667	0	0	1125	475822	625708	0.00236433	0.760453758	49.66666667	8/20/2005
3	Corn	5-Aug	2005	Aug	8	2	2005	B	2.5	3	231.6666667	0	0	179	7178	7899	0.024937308	0.908722623	49.66666667	8/20/2005
5	Field Crop	5-Aug	2005	Aug	8	2	2005	B	2.5	3	231.6666667	0	0	4069	226156	303397	0.017992006	0.745412776	49.66666667	8/20/2005
7	Grains	5-Aug	2005	Aug	8	2	2005	B	2.5	3	231.6666667	0	0	164	11905	33544	0.013775724	0.354906988	49.66666667	8/20/2005
11	Alfalfa	5-Aug	2005	Aug	8	2	2005	B	2.5	3	231.6666667	0	0	220	35538	40265	0.006190557	0.882602757	49.66666667	8/20/2005
12	Rice	5-Aug	2005	Aug	8	2	2005	B	2.5	3	231.6666667	0	0	3895	398083	457898	0.009784392	0.869370471	49.66666667	8/20/2005
13	Row Crop	5-Aug	2005	Aug	8	2	2005	B	2.5	3	231.6666667	0	0	0	177	246	0	0.719512195	49.66666667	8/20/2005
99	Suitable-unassigned	5-Aug	2005	Aug	8	2	2005	B	2.5	3	231.6666667	0	0	701	64104	94962	0.010935355	0.675048967	49.66666667	8/20/2005
100	Vineyard/Orchard	5-Aug	2005	Aug	8	2	2005	B	2.5	3	231.6666667	0	0	2153	255285	290723	0.008433711	0.8781039	49.66666667	8/20/2005
0	Unsuitable	6-Aug	2006	Aug	8	2	2006	A	2	3	218.6666667	0	0	34281	867523	867523	0.039515955	1	36.66666667	8/7/2006
1	Grass/Pasture	6-Aug	2006	Aug	8	2	2006	A	2	3	218.6666667	0	0	2003	625708	625708	0.003201174	1	36.66666667	8/7/2006
3	Corn	6-Aug	2006	Aug	8	2	2006	A	2	3	218.6666667	0	0	196	7899	7899	0.024813268	1	36.66666667	8/7/2006
5	Field Crop	6-Aug	2006	Aug	8	2	2006	A	2	3	218.6666667	0	0	7123	303397	303397	0.02347749	1	36.66666667	8/7/2006
7	Grains	6-Aug	2006	Aug	8	2	2006	A	2	3	218.6666667	0	0	629	33544	33544	0.018751491	1	36.66666667	8/7/2006
11	Alfalfa	6-Aug	2006	Aug	8	2	2006	A	2	3	218.6666667	0	0	416	40265	40265	0.010331553	1	36.66666667	8/7/2006
12	Rice	6-Aug	2006	Aug	8	2	2006	A	2	3	218.6666667	0	0	6678	457898	457898	0.014584034	1	36.66666667	8/7/2006
13	Row Crop	6-Aug	2006	Aug	8	2	2006	A	2	3	218.6666667	0	0	7	246	246	0.028455285	1	36.66666667	8/7/2006
99	Suitable-unassigned	6-Aug	2006	Aug	8	2	2006	A	2	3	218.6666667	0	0	1805	94962	94962	0.019007603	1	36.66666667	8/7/2006
100	Vineyard/Orchard	6-Aug	2006	Aug	8	2	2006	A	2	3	218.6666667	0	0	4378	290723	290723	0.015059008	1	36.66666667	8/7/2006
0	Unsuitable	7-Aug	2007	Aug	8	2	2007	B	2.5	3	237.6666667	0	0	33673	867523	867523	0.038815109	1	55.66666667	8/26/2007
1	Grass/Pasture	7-Aug	2007	Aug	8	2	2007	B	2.5	3	237.6666667	0	0	1400	625708	625708	0.002237465	1	55.66666667	8/26/2007
3	Corn	7-Aug	2007	Aug	8	2	2007	B	2.5	3	237.6666667	0	0	303	7899	7899	0.038359286	1	55.66666667	8/26/2007
5	Field Crop	7-Aug	2007	Aug	8	2	2007	B	2.5	3	237.6666667	0	0	5960	303397	303397	0.019644229	1	55.66666667	8/26/2007
7	Grains	7-Aug	2007	Aug	8	2	2007	B	2.5	3	237.6666667	0	0	127	33544	33544	0.003786072	1	55.66666667	8/26/2007
11	Alfalfa	7-Aug	2007	Aug	8	2	2007	B	2.5	3	237.6666667	0	0	264	40265	40265	0.006556563	1	55.66666667	8/26/2007
12	Rice	7-Aug	2007	Aug	8	2	2007	B	2.5	3	237.6666667	0	0	4528	457898	457898	0.009888665	1	55.66666667	8/26/2007
13	Row Crop	7-Aug	2007	Aug	8	2	2007	B	2.5	3	237.6666667	0	0	3	246	246	0.012195122	1	55.66666667	8/26/2007
99	Suitable-unassigned	7-Aug	2007	Aug	8	2	2007	B	2.5	3	237.6666667	0	0	987	94962	94962	0.010393631	1	55.66666667	8/26/2007
100	Vineyard/Orchard	7-Aug	2007	Aug	8	2	2007	B	2.5	3	237.6666667	0	0	2336	290723	290723	0.00803514	1	55.66666667	8/26/2007
0	Unsuitable	8-Aug	2008	Aug	8	2	2008	B	2.5	3	235.3333333	0	0	37438	867523	867523	0.043155052	1	52.33333333	8/23/2008
1	Grass/Pasture	8-Aug	2008	Aug	8	2	2008	B	2.5	3	235.3333333	0	0	1969	625708	625708	0.003146835	1	52.33333333	8/23/2008
3	Corn	8-Aug	2008	Aug	8	2	2008	B	2.5	3	235.3333333	0	0	39	7899	7899	0.004937334	1	52.33333333	8/23/2008
5	Field Crop	8-Aug	2008	Aug	8	2	2008	B	2.5	3	235.3333333	0	0	7543	303397	303397	0.024861815	1	52.33333333	8/23/2008
7	Grains	8-Aug	2008	Aug	8	2	2008	B	2.5	3	235.3333333	0	0	391	33544	33544	0.011656332	1	52.33333333	8/23/2008
11	Alfalfa	8-Aug	2008	Aug	8	2	2008	B	2.5	3	235.3333333	0	0	690	40265	40265	0.017136471	1	52.33333333	8/23/2008
12	Rice	8-Aug	2008	Aug	8	2	2008	B	2.5	3	235.3333333	0	0	4090	457898	457898	0.00893212	1	52.33333333	8/23/2008
13	Row Crop	8-Aug	2008	Aug	8	2	2008	B	2.5	3	235.3333333	0	0	13	246	246	0.052845528	1	52.33333333	8/23/2008
99	Suitable-unassigned	8-Aug	2008	Aug	8	2	2008	B	2.5	3	235.3333333	0	0	1314	94962	94962	0.013837114	1	52.33333333	8/23/2008
100	Vineyard/Orchard	8-Aug	2008	Aug	8	2	2008	B	2.5	3	235.3333333	0	0	3856	290723	290723	0.013263484	1	52.33333333	8/23/2008
0	Unsuitable	9-Aug	2009	Aug	8	2	2009	A	2	3	219.5	0	0	29013	867523	867523	0.033443494	1	37.5	8/8/2009
0	Unsuitable	9-Aug	2009	Aug	8	2	2009	B	2.5	3	237.3333333	0	0	33506	867376	867523	0.038629153	0.999830552	55.33333333	8/26/2009
1	Grass/Pasture	9-Aug	2009	Aug	8	2	2009	A	2	3	219.5	0	0	885	625708	625708	0.001414398	1	37.5	8/8/2009
1	Grass/Pasture	9-Aug	2009	Aug	8	2	2009	B	2.5	3	237.3333333	0	0	1163	625708	625708	0.001858694	1	55.33333333	8/26/2009
3	Corn	9-Aug	2009	Aug	8	2	2009	A	2	3	219.5	0	0	17	7899	7899	0.002152171	1	37.5	8/8/2009
3	Corn	9-Aug	2009	Aug	8	2	2009	B	2.5	3	237.3333333	0	0	38	7899	7899	0.004810736	1	55.33333333	8/26/2009
5	Field Crop	9-Aug	2009	Aug	8	2	2009	A	2	3	219.5	0	0	4727	303397	303397	0.015580246	1	37.5	8/8/2009
5	Field Crop	9-Aug	2009	Aug	8	2	2009	B	2.5	3	237.3333333	0	0	6997	303371	303397	0.023064169	0.999914304	55.33333333	8/26/2009
7	Grains	9-Aug	2009	Aug	8	2	2009	A	2	3	219.5	0	0	227	33544	33544	0.006767231	1	37.5	8/8/2009
7	Grains	9-Aug	2009	Aug	8	2	2009	B	2.5	3	237.3333333	0	0	334	33544	33544	0.009957071	1	55.33333333	8/26/2009
11	Alfalfa	9-Aug	2009	Aug	8	2	2009	A	2	3	219.5	0	0	420	40265	40265	0.010430895	1	37.5	8/8/2009
11	Alfalfa	9-Aug	2009	Aug	8	2	2009	B	2.5	3	237.3333333	0	0	357	40265	40265	0.008866261	1	55.33333333	8/26/2009
12	Rice	9-Aug	2009	Aug	8	2	2009	A	2	3	219.5	0	0	1560	457898	457898	0.003406872	1	37.5	8/8/2009
12	Rice	9-Aug	2009	Aug	8	2	2009	B	2.5	3	237.3333333	0	0	3036	457898	457898	0.006630298	1	55.33333333	8/26/2009
13	Row Crop	9-Aug	2009	Aug	8	2	2009	A	2	3	219.5	0	0	3	246	246	0.012195122	1	37.5	8/8/2009
13	Row Crop	9-Aug	2009	Aug	8	2	2009	B	2.5	3	237.3333333	0	0	6	246	246	0.024390244	1	55.33333333	8/26/2009
99	Suitable-unassigned	9-Aug	2009	Aug	8	2	2009	A	2	3	219.5	0	0	788	94962	94962	0.008298056	1	37.5	8/8/2009
99	Suitable-unassigned	9-Aug	2009	Aug	8	2	2009	B	2.5	3	237.3333333	0	0	1427	94962	94962	0.015027063	1	55.33333333	8/26/2009
100	Vineyard/Orchard	9-Aug	2009	Aug	8	2	2009	A	2	3	219.5	0	0	1683	290723	290723	0.005789016	1	37.5	8/8/2009
100	Vineyard/Orchard	9-Aug	2009	Aug	8	2	2009	B	2.5	3	237.3333333	0	0	2760	290522	290723	0.009500141	0.99930862	55.33333333	8/26/2009
0	Unsuitable	10-Aug	2010	Aug	8	2	2010	A	2	3	222.5	0	0	33066	867523	867523	0.038115416	1	40.5	8/11/2010
0	Unsuitable	10-Aug	2010	Aug	8	2	2010	B	2.5	3	235	0	0	30121	867523	867523	0.034720693	1	53	8/24/2010
1	Grass/Pasture	10-Aug	2010	Aug	8	2	2010	A	2	3	222.5	0	0	995	625708	625708	0.001590199	1	40.5	8/11/2010
1	Grass/Pasture	10-Aug	2010	Aug	8	2	2010	B	2.5	3	235	0	0	871	625708	625708	0.001392023	1	53	8/24/2010
3	Corn	10-Aug	2010	Aug	8	2	2010	A	2	3	222.5	0	0	59	7899	7899	0.0074693	1	40.5	8/11/2010
3	Corn	10-Aug	2010	Aug	8	2	2010	B	2.5	3	235	0	0	51	7899	7899	0.006456513	1	53	8/24/2010
5	Field Crop	10-Aug	2010	Aug	8	2	2010	A	2	3	222.5	0	0	6845	303397	303397	0.022561199	1	40.5	8/11/2010
5	Field Crop	10-Aug	2010	Aug	8	2	2010	B	2.5	3	235	0	0	6223	303397	303397	0.02051108	1	53	8/24/2010
7	Grains	10-Aug	2010	Aug	8	2	2010	A	2	3	222.5	0	0	256	33544	33544	0.007631767	1	40.5	8/11/2010
7	Grains	10-Aug	2010	Aug	8	2	2010	B	2.5	3	235	0	0	153	33544	33544	0.004561173	1	53	8/24/2010
11	Alfalfa	10-Aug	2010	Aug	8	2	2010	A	2	3	222.5	0	0	292	40265	40265	0.007251956	1	40.5	8/11/2010
11	Alfalfa	10-Aug	2010	Aug	8	2	2010	B	2.5	3	235	0	0	246	40265	40265	0.006109524	1	53	8/24/2010
12	Rice	10-Aug	2010	Aug	8	2	2010	A	2	3	222.5	0	0	3698	457898	457898	0.008076034	1	40.5	8/11/2010
12	Rice	10-Aug	2010	Aug	8	2	2010	B	2.5	3	235	0	0	2761	457898	457898	0.006029727	1	53	8/24/2010
13	Row Crop	10-Aug	2010	Aug	8	2	2010	A	2	3	222.5	0	0	5	246	246	0.020325203	1	40.5	8/11/2010
13	Row Crop	10-Aug	2010	Aug	8	2	2010	B	2.5	3	235	0	0	5	246	246	0.020325203	1	53	8/24/2010
99	Suitable-unassigned	10-Aug	2010	Aug	8	2	2010	A	2	3	222.5	0	0	1484	94962	94962	0.015627304	1	40.5	8/11/2010
99	Suitable-unassigned	10-Aug	2010	Aug	8	2	2010	B	2.5	3	235	0	0	1150	94962	94962	0.012110107	1	53	8/24/2010
100	Vineyard/Orchard	10-Aug	2010	Aug	8	2	2010	A	2	3	222.5	0	0	2603	290723	290723	0.00895354	1	40.5	8/11/2010
100	Vineyard/Orchard	10-Aug	2010	Aug	8	2	2010	B	2.5	3	235	0	0	2354	290723	290723	0.008097055	1	53	8/24/2010
0	Unsuitable	11-Aug	2011	Aug	8	2	2011	B	2.5	3	232.6666667	0	0	31786	867523	867523	0.036639951	1	50.66666667	8/21/2011
1	Grass/Pasture	11-Aug	2011	Aug	8	2	2011	B	2.5	3	232.6666667	0	0	1556	625708	625708	0.002486783	1	50.66666667	8/21/2011
3	Corn	11-Aug	2011	Aug	8	2	2011	B	2.5	3	232.6666667	0	0	5	7899	7899	0.000632992	1	50.66666667	8/21/2011
5	Field Crop	11-Aug	2011	Aug	8	2	2011	B	2.5	3	232.6666667	0	0	6348	303397	303397	0.020923081	1	50.66666667	8/21/2011
7	Grains	11-Aug	2011	Aug	8	2	2011	B	2.5	3	232.6666667	0	0	222	33544	33544	0.006618173	1	50.66666667	8/21/2011
11	Alfalfa	11-Aug	2011	Aug	8	2	2011	B	2.5	3	232.6666667	0	0	224	40265	40265	0.005563144	1	50.66666667	8/21/2011
12	Rice	11-Aug	2011	Aug	8	2	2011	B	2.5	3	232.6666667	0	0	2457	457898	457898	0.005365824	1	50.66666667	8/21/2011
13	Row Crop	11-Aug	2011	Aug	8	2	2011	B	2.5	3	232.6666667	0	0	6	246	246	0.024390244	1	50.66666667	8/21/2011
99	Suitable-unassigned	11-Aug	2011	Aug	8	2	2011	B	2.5	3	232.6666667	0	0	1362	94962	94962	0.014342579	1	50.66666667	8/21/2011
100	Vineyard/Orchard	11-Aug	2011	Aug	8	2	2011	B	2.5	3	232.6666667	0	0	2487	290723	290723	0.008554535	1	50.66666667	8/21/2011
0	Unsuitable	13-Aug	2013	Aug	8	2	2013	B	2.5	3	237.6666667	0	0	12386	713751	867523	0.017353391	0.82274591	55.66666667	8/26/2013
1	Grass/Pasture	13-Aug	2013	Aug	8	2	2013	B	2.5	3	237.6666667	0	0	497	446235	625708	0.001113763	0.713168123	55.66666667	8/26/2013
3	Corn	13-Aug	2013	Aug	8	2	2013	B	2.5	3	237.6666667	0	0	1	7863	7899	0.000127178	0.995442461	55.66666667	8/26/2013
5	Field Crop	13-Aug	2013	Aug	8	2	2013	B	2.5	3	237.6666667	0	0	1260	235856	303397	0.005342243	0.777384088	55.66666667	8/26/2013
7	Grains	13-Aug	2013	Aug	8	2	2013	B	2.5	3	237.6666667	0	0	29	29213	33544	0.000992709	0.870886	55.66666667	8/26/2013
11	Alfalfa	13-Aug	2013	Aug	8	2	2013	B	2.5	3	237.6666667	0	0	29	31282	40265	0.000927051	0.776903018	55.66666667	8/26/2013
12	Rice	13-Aug	2013	Aug	8	2	2013	B	2.5	3	237.6666667	0	0	328	377442	457898	0.000869008	0.824292746	55.66666667	8/26/2013
13	Row Crop	13-Aug	2013	Aug	8	2	2013	B	2.5	3	237.6666667	0	0	2	226	246	0.008849558	0.918699187	55.66666667	8/26/2013
99	Suitable-unassigned	13-Aug	2013	Aug	8	2	2013	B	2.5	3	237.6666667	0	0	176	76215	94962	0.002309257	0.802584192	55.66666667	8/26/2013
100	Vineyard/Orchard	13-Aug	2013	Aug	8	2	2013	B	2.5	3	237.6666667	0	0	540	201536	290723	0.002679422	0.693223446	55.66666667	8/26/2013
0	Unsuitable	1-Sep	2001	Sep	9	3	2001	A	3	3	252.6666667	0	0	31753	856342	867523	0.037079812	0.987111581	70.66666667	9/10/2001
1	Grass/Pasture	1-Sep	2001	Sep	9	3	2001	A	3	3	252.6666667	0	0	1932	623584	625708	0.003098219	0.996605445	70.66666667	9/10/2001
3	Corn	1-Sep	2001	Sep	9	3	2001	A	3	3	252.6666667	0	0	38	7899	7899	0.004810736	1	70.66666667	9/10/2001
5	Field Crop	1-Sep	2001	Sep	9	3	2001	A	3	3	252.6666667	0	0	6182	303153	303397	0.020392343	0.999195773	70.66666667	9/10/2001
7	Grains	1-Sep	2001	Sep	9	3	2001	A	3	3	252.6666667	0	0	410	33544	33544	0.012222752	1	70.66666667	9/10/2001
11	Alfalfa	1-Sep	2001	Sep	9	3	2001	A	3	3	252.6666667	0	0	454	40265	40265	0.011275301	1	70.66666667	9/10/2001
12	Rice	1-Sep	2001	Sep	9	3	2001	A	3	3	252.6666667	0	0	8192	457898	457898	0.017890447	1	70.66666667	9/10/2001
13	Row Crop	1-Sep	2001	Sep	9	3	2001	A	3	3	252.6666667	0	0	3	246	246	0.012195122	1	70.66666667	9/10/2001
99	Suitable-unassigned	1-Sep	2001	Sep	9	3	2001	A	3	3	252.6666667	0	0	1465	94942	94962	0.015430473	0.999789389	70.66666667	9/10/2001
100	Vineyard/Orchard	1-Sep	2001	Sep	9	3	2001	A	3	3	252.6666667	0	0	3904	289016	290723	0.013507903	0.994128432	70.66666667	9/10/2001
0	Unsuitable	2-Sep	2002	Sep	9	3	2002	A	3	3	250.3333333	0	0	30185	867523	867523	0.034794467	1	68.33333333	9/8/2002
0	Unsuitable	2-Sep	2002	Sep	9	3	2002	B	3.5	3	266.3333333	0	0	42449	867523	867523	0.048931268	1	84.33333333	9/24/2002
1	Grass/Pasture	2-Sep	2002	Sep	9	3	2002	A	3	3	250.3333333	0	0	1572	625708	625708	0.002512354	1	68.33333333	9/8/2002
1	Grass/Pasture	2-Sep	2002	Sep	9	3	2002	B	3.5	3	266.3333333	0	0	2375	625708	625708	0.0037957	1	84.33333333	9/24/2002
3	Corn	2-Sep	2002	Sep	9	3	2002	A	3	3	250.3333333	0	0	4	7899	7899	0.000506393	1	68.33333333	9/8/2002
3	Corn	2-Sep	2002	Sep	9	3	2002	B	3.5	3	266.3333333	0	0	144	7899	7899	0.018230156	1	84.33333333	9/24/2002
5	Field Crop	2-Sep	2002	Sep	9	3	2002	A	3	3	250.3333333	0	0	5702	303397	303397	0.018793858	1	68.33333333	9/8/2002
5	Field Crop	2-Sep	2002	Sep	9	3	2002	B	3.5	3	266.3333333	0	0	8624	303397	303397	0.028424803	1	84.33333333	9/24/2002
7	Grains	2-Sep	2002	Sep	9	3	2002	A	3	3	250.3333333	0	0	116	33544	33544	0.003458145	1	68.33333333	9/8/2002
7	Grains	2-Sep	2002	Sep	9	3	2002	B	3.5	3	266.3333333	0	0	249	33544	33544	0.007423086	1	84.33333333	9/24/2002
11	Alfalfa	2-Sep	2002	Sep	9	3	2002	A	3	3	250.3333333	0	0	233	40265	40265	0.005786663	1	68.33333333	9/8/2002
11	Alfalfa	2-Sep	2002	Sep	9	3	2002	B	3.5	3	266.3333333	0	0	665	40265	40265	0.016515584	1	84.33333333	9/24/2002
12	Rice	2-Sep	2002	Sep	9	3	2002	A	3	3	250.3333333	0	0	4528	457898	457898	0.009888665	1	68.33333333	9/8/2002
12	Rice	2-Sep	2002	Sep	9	3	2002	B	3.5	3	266.3333333	0	0	13984	457898	457898	0.030539552	1	84.33333333	9/24/2002
13	Row Crop	2-Sep	2002	Sep	9	3	2002	A	3	3	250.3333333	0	0	0	246	246	0	1	68.33333333	9/8/2002
13	Row Crop	2-Sep	2002	Sep	9	3	2002	B	3.5	3	266.3333333	0	0	0	246	246	0	1	84.33333333	9/24/2002
99	Suitable-unassigned	2-Sep	2002	Sep	9	3	2002	A	3	3	250.3333333	0	0	1124	94962	94962	0.011836313	1	68.33333333	9/8/2002
99	Suitable-unassigned	2-Sep	2002	Sep	9	3	2002	B	3.5	3	266.3333333	0	0	1648	94962	94962	0.01735431	1	84.33333333	9/24/2002
100	Vineyard/Orchard	2-Sep	2002	Sep	9	3	2002	A	3	3	250.3333333	0	0	2833	290723	290723	0.009744671	1	68.33333333	9/8/2002
100	Vineyard/Orchard	2-Sep	2002	Sep	9	3	2002	B	3.5	3	266.3333333	0	0	5052	290723	290723	0.017377366	1	84.33333333	9/24/2002
0	Unsuitable	5-Sep	2005	Sep	9	3	2005	B	3.5	3	263.6666667	0	0	14634	574334	867523	0.025479947	0.662038932	81.66666667	9/21/2005
1	Grass/Pasture	5-Sep	2005	Sep	9	3	2005	B	3.5	3	263.6666667	0	0	2971	289077	625708	0.010277539	0.461999847	81.66666667	9/21/2005
3	Corn	5-Sep	2005	Sep	9	3	2005	B	3.5	3	263.6666667	0	0	0	872	7899	0	0.110393721	81.66666667	9/21/2005
5	Field Crop	5-Sep	2005	Sep	9	3	2005	B	3.5	3	263.6666667	0	0	2400	125188	303397	0.019171167	0.412621087	81.66666667	9/21/2005
7	Grains	5-Sep	2005	Sep	9	3	2005	B	3.5	3	263.6666667	0	0	47	23337	33544	0.002013969	0.695713093	81.66666667	9/21/2005
11	Alfalfa	5-Sep	2005	Sep	9	3	2005	B	3.5	3	263.6666667	0	0	179	14008	40265	0.012778412	0.347895194	81.66666667	9/21/2005
12	Rice	5-Sep	2005	Sep	9	3	2005	B	3.5	3	263.6666667	0	0	1148	148925	457898	0.007708578	0.325236188	81.66666667	9/21/2005
13	Row Crop	5-Sep	2005	Sep	9	3	2005	B	3.5	3	263.6666667	0	0	0	165	246	0	0.670731707	81.66666667	9/21/2005
99	Suitable-unassigned	5-Sep	2005	Sep	9	3	2005	B	3.5	3	263.6666667	0	0	661	44740	94962	0.014774251	0.471135823	81.66666667	9/21/2005
100	Vineyard/Orchard	5-Sep	2005	Sep	9	3	2005	B	3.5	3	263.6666667	0	0	539	29428	290723	0.01831589	0.101223501	81.66666667	9/21/2005
0	Unsuitable	6-Sep	2006	Sep	9	3	2006	A	3	3	250.6666667	0	0	41042	867523	867523	0.047309409	1	68.66666667	9/8/2006
0	Unsuitable	6-Sep	2006	Sep	9	3	2006	B	3.5	3	266.6666667	0	0	6804	193182	867523	0.035220673	0.22268228	84.66666667	9/24/2006
1	Grass/Pasture	6-Sep	2006	Sep	9	3	2006	A	3	3	250.6666667	0	0	1950	625708	625708	0.00311647	1	68.66666667	9/8/2006
1	Grass/Pasture	6-Sep	2006	Sep	9	3	2006	B	3.5	3	266.6666667	0	0	927	29858	625708	0.031046956	0.047718744	84.66666667	9/24/2006
3	Corn	6-Sep	2006	Sep	9	3	2006	A	3	3	250.6666667	0	0	180	7899	7899	0.022787695	1	68.66666667	9/8/2006
3	Corn	6-Sep	2006	Sep	9	3	2006	B	3.5	3	266.6666667	0	0	0	482	7899	0	0.061020382	84.66666667	9/24/2006
5	Field Crop	6-Sep	2006	Sep	9	3	2006	A	3	3	250.6666667	0	0	7276	303397	303397	0.02398178	1	68.66666667	9/8/2006
5	Field Crop	6-Sep	2006	Sep	9	3	2006	B	3.5	3	266.6666667	0	0	884	27820	303397	0.031775701	0.09169504	84.66666667	9/24/2006
7	Grains	6-Sep	2006	Sep	9	3	2006	A	3	3	250.6666667	0	0	210	33544	33544	0.006260434	1	68.66666667	9/8/2006
7	Grains	6-Sep	2006	Sep	9	3	2006	B	3.5	3	266.6666667	0	0	75	10659	33544	0.007036307	0.317761746	84.66666667	9/24/2006
11	Alfalfa	6-Sep	2006	Sep	9	3	2006	A	3	3	250.6666667	0	0	1245	40265	40265	0.030920154	1	68.66666667	9/8/2006
11	Alfalfa	6-Sep	2006	Sep	9	3	2006	B	3.5	3	266.6666667	0	0	59	3228	40265	0.018277571	0.080168881	84.66666667	9/24/2006
12	Rice	6-Sep	2006	Sep	9	3	2006	A	3	3	250.6666667	0	0	6034	457898	457898	0.013177607	1	68.66666667	9/8/2006
12	Rice	6-Sep	2006	Sep	9	3	2006	B	3.5	3	266.6666667	0	0	386	22867	457898	0.01688022	0.049939069	84.66666667	9/24/2006
13	Row Crop	6-Sep	2006	Sep	9	3	2006	A	3	3	250.6666667	0	0	3	246	246	0.012195122	1	68.66666667	9/8/2006
13	Row Crop	6-Sep	2006	Sep	9	3	2006	B	3.5	3	266.6666667	0	0	0	16	246	0	0.06504065	84.66666667	9/24/2006
99	Suitable-unassigned	6-Sep	2006	Sep	9	3	2006	A	3	3	250.6666667	0	0	1652	94962	94962	0.017396432	1	68.66666667	9/8/2006
99	Suitable-unassigned	6-Sep	2006	Sep	9	3	2006	B	3.5	3	266.6666667	0	0	319	7701	94962	0.041423192	0.081095596	84.66666667	9/24/2006
100	Vineyard/Orchard	6-Sep	2006	Sep	9	3	2006	A	3	3	250.6666667	0	0	4419	290723	290723	0.015200036	1	68.66666667	9/8/2006
100	Vineyard/Orchard	6-Sep	2006	Sep	9	3	2006	B	3.5	3	266.6666667	0	0	802	37667	290723	0.021291847	0.129563192	84.66666667	9/24/2006
0	Unsuitable	7-Sep	2007	Sep	9	3	2007	A	3	3	251	0	0	37592	867523	867523	0.043332569	1	69	9/9/2007
1	Grass/Pasture	7-Sep	2007	Sep	9	3	2007	A	3	3	251	0	0	1774	625708	625708	0.002835188	1	69	9/9/2007
3	Corn	7-Sep	2007	Sep	9	3	2007	A	3	3	251	0	0	223	7899	7899	0.028231422	1	69	9/9/2007
5	Field Crop	7-Sep	2007	Sep	9	3	2007	A	3	3	251	0	0	7568	303397	303397	0.024944215	1	69	9/9/2007
7	Grains	7-Sep	2007	Sep	9	3	2007	A	3	3	251	0	0	223	33544	33544	0.006647985	1	69	9/9/2007
11	Alfalfa	7-Sep	2007	Sep	9	3	2007	A	3	3	251	0	0	566	40265	40265	0.014056873	1	69	9/9/2007
12	Rice	7-Sep	2007	Sep	9	3	2007	A	3	3	251	0	0	7433	457898	457898	0.016232873	1	69	9/9/2007
13	Row Crop	7-Sep	2007	Sep	9	3	2007	A	3	3	251	0	0	14	246	246	0.056910569	1	69	9/9/2007
99	Suitable-unassigned	7-Sep	2007	Sep	9	3	2007	A	3	3	251	0	0	1805	94962	94962	0.019007603	1	69	9/9/2007
100	Vineyard/Orchard	7-Sep	2007	Sep	9	3	2007	A	3	3	251	0	0	2890	290723	290723	0.009940734	1	69	9/9/2007
0	Unsuitable	8-Sep	2008	Sep	9	3	2008	A	3	3	251.3333333	0	0	45803	867523	867523	0.052797447	1	68.33333333	9/8/2008
1	Grass/Pasture	8-Sep	2008	Sep	9	3	2008	A	3	3	251.3333333	0	0	2643	625708	625708	0.004224015	1	68.33333333	9/8/2008
3	Corn	8-Sep	2008	Sep	9	3	2008	A	3	3	251.3333333	0	0	202	7899	7899	0.025572857	1	68.33333333	9/8/2008
5	Field Crop	8-Sep	2008	Sep	9	3	2008	A	3	3	251.3333333	0	0	10080	303397	303397	0.033223796	1	68.33333333	9/8/2008
7	Grains	8-Sep	2008	Sep	9	3	2008	A	3	3	251.3333333	0	0	985	33544	33544	0.029364417	1	68.33333333	9/8/2008
11	Alfalfa	8-Sep	2008	Sep	9	3	2008	A	3	3	251.3333333	0	0	1541	40265	40265	0.038271452	1	68.33333333	9/8/2008
12	Rice	8-Sep	2008	Sep	9	3	2008	A	3	3	251.3333333	0	0	7345	457898	457898	0.01604069	1	68.33333333	9/8/2008
13	Row Crop	8-Sep	2008	Sep	9	3	2008	A	3	3	251.3333333	0	0	13	246	246	0.052845528	1	68.33333333	9/8/2008
99	Suitable-unassigned	8-Sep	2008	Sep	9	3	2008	A	3	3	251.3333333	0	0	2548	94962	94962	0.026831785	1	68.33333333	9/8/2008
100	Vineyard/Orchard	8-Sep	2008	Sep	9	3	2008	A	3	3	251.3333333	0	0	4777	290723	290723	0.016431448	1	68.33333333	9/8/2008
0	Unsuitable	9-Sep	2009	Sep	9	3	2009	A	3	3	251.5	0	0	28260	867523	867523	0.032575505	1	69.5	9/9/2009
1	Grass/Pasture	9-Sep	2009	Sep	9	3	2009	A	3	3	251.5	0	0	964	625708	625708	0.001540655	1	69.5	9/9/2009
3	Corn	9-Sep	2009	Sep	9	3	2009	A	3	3	251.5	0	0	383	7899	7899	0.04848715	1	69.5	9/9/2009
5	Field Crop	9-Sep	2009	Sep	9	3	2009	A	3	3	251.5	0	0	7088	303397	303397	0.023362129	1	69.5	9/9/2009
7	Grains	9-Sep	2009	Sep	9	3	2009	A	3	3	251.5	0	0	184	33544	33544	0.005485333	1	69.5	9/9/2009
11	Alfalfa	9-Sep	2009	Sep	9	3	2009	A	3	3	251.5	0	0	144	40265	40265	0.003576307	1	69.5	9/9/2009
12	Rice	9-Sep	2009	Sep	9	3	2009	A	3	3	251.5	0	0	5089	457898	457898	0.011113829	1	69.5	9/9/2009
13	Row Crop	9-Sep	2009	Sep	9	3	2009	A	3	3	251.5	0	0	4	246	246	0.016260163	1	69.5	9/9/2009
99	Suitable-unassigned	9-Sep	2009	Sep	9	3	2009	A	3	3	251.5	0	0	1462	94962	94962	0.015395632	1	69.5	9/9/2009
100	Vineyard/Orchard	9-Sep	2009	Sep	9	3	2009	A	3	3	251.5	0	0	2505	290723	290723	0.008616449	1	69.5	9/9/2009
0	Unsuitable	11-Sep	2011	Sep	9	3	2011	A	3	3	249.5	0	0	34011	867523	867523	0.039204724	1	67.5	9/7/2011
0	Unsuitable	11-Sep	2011	Sep	9	3	2011	B	3.5	3	264.6666667	0	0	31583	867523	867523	0.036405951	1	82.66666667	9/22/2011
1	Grass/Pasture	11-Sep	2011	Sep	9	3	2011	A	3	3	249.5	0	0	1072	625708	625708	0.001713259	1	67.5	9/7/2011
1	Grass/Pasture	11-Sep	2011	Sep	9	3	2011	B	3.5	3	264.6666667	0	0	932	625708	625708	0.001489513	1	82.66666667	9/22/2011
3	Corn	11-Sep	2011	Sep	9	3	2011	A	3	3	249.5	0	0	9	7899	7899	0.001139385	1	67.5	9/7/2011
3	Corn	11-Sep	2011	Sep	9	3	2011	B	3.5	3	264.6666667	0	0	7	7899	7899	0.000886188	1	82.66666667	9/22/2011
5	Field Crop	11-Sep	2011	Sep	9	3	2011	A	3	3	249.5	0	0	6893	303397	303397	0.022719407	1	67.5	9/7/2011
5	Field Crop	11-Sep	2011	Sep	9	3	2011	B	3.5	3	264.6666667	0	0	6736	303397	303397	0.022201933	1	82.66666667	9/22/2011
7	Grains	11-Sep	2011	Sep	9	3	2011	A	3	3	249.5	0	0	176	33544	33544	0.00524684	1	67.5	9/7/2011
7	Grains	11-Sep	2011	Sep	9	3	2011	B	3.5	3	264.6666667	0	0	126	33544	33544	0.00375626	1	82.66666667	9/22/2011
11	Alfalfa	11-Sep	2011	Sep	9	3	2011	A	3	3	249.5	0	0	542	40265	40265	0.013460822	1	67.5	9/7/2011
11	Alfalfa	11-Sep	2011	Sep	9	3	2011	B	3.5	3	264.6666667	0	0	375	40265	40265	0.009313299	1	82.66666667	9/22/2011
12	Rice	11-Sep	2011	Sep	9	3	2011	A	3	3	249.5	0	0	2736	457898	457898	0.00597513	1	67.5	9/7/2011
12	Rice	11-Sep	2011	Sep	9	3	2011	B	3.5	3	264.6666667	0	0	2570	457898	457898	0.005612604	1	82.66666667	9/22/2011
13	Row Crop	11-Sep	2011	Sep	9	3	2011	A	3	3	249.5	0	0	7	246	246	0.028455285	1	67.5	9/7/2011
13	Row Crop	11-Sep	2011	Sep	9	3	2011	B	3.5	3	264.6666667	0	0	0	246	246	0	1	82.66666667	9/22/2011
99	Suitable-unassigned	11-Sep	2011	Sep	9	3	2011	A	3	3	249.5	0	0	1511	94962	94962	0.015911628	1	67.5	9/7/2011
99	Suitable-unassigned	11-Sep	2011	Sep	9	3	2011	B	3.5	3	264.6666667	0	0	1106	94962	94962	0.011646764	1	82.66666667	9/22/2011
100	Vineyard/Orchard	11-Sep	2011	Sep	9	3	2011	A	3	3	249.5	0	0	2662	290723	290723	0.009156482	1	67.5	9/7/2011
100	Vineyard/Orchard	11-Sep	2011	Sep	9	3	2011	B	3.5	3	264.6666667	0	0	2220	290723	290723	0.007636135	1	82.66666667	9/22/2011
0	Unsuitable	13-Sep	2013	Sep	9	3	2013	A	3	3	251	0	0	25145	863259	867523	0.029127991	0.995084857	69	9/9/2013
1	Grass/Pasture	13-Sep	2013	Sep	9	3	2013	A	3	3	251	0	0	359	619900	625708	0.000579126	0.990717715	69	9/9/2013
3	Corn	13-Sep	2013	Sep	9	3	2013	A	3	3	251	0	0	20	7899	7899	0.002531966	1	69	9/9/2013
5	Field Crop	13-Sep	2013	Sep	9	3	2013	A	3	3	251	0	0	3723	303397	303397	0.012271051	1	69	9/9/2013
7	Grains	13-Sep	2013	Sep	9	3	2013	A	3	3	251	0	0	205	33544	33544	0.006111376	1	69	9/9/2013
11	Alfalfa	13-Sep	2013	Sep	9	3	2013	A	3	3	251	0	0	23	40255	40265	0.000571358	0.999751645	69	9/9/2013
12	Rice	13-Sep	2013	Sep	9	3	2013	A	3	3	251	0	0	1966	457898	457898	0.004293533	1	69	9/9/2013
13	Row Crop	13-Sep	2013	Sep	9	3	2013	A	3	3	251	0	0	2	246	246	0.008130081	1	69	9/9/2013
99	Suitable-unassigned	13-Sep	2013	Sep	9	3	2013	A	3	3	251	0	0	731	94958	94962	0.00769814	0.999957878	69	9/9/2013
100	Vineyard/Orchard	13-Sep	2013	Sep	9	3	2013	A	3	3	251	0	0	953	290598	290723	0.003279444	0.999570037	69	9/9/2013
0	Unsuitable	1-Oct	2001	Oct	10	4	2001	B	4.5	3	295.3333333	0	0	35790	684931	867523	0.052253439	0.789524889	113.3333333	10/23/2001
1	Grass/Pasture	1-Oct	2001	Oct	10	4	2001	B	4.5	3	295.3333333	0	0	3020	339366	625708	0.008898947	0.542371202	113.3333333	10/23/2001
3	Corn	1-Oct	2001	Oct	10	4	2001	B	4.5	3	295.3333333	0	0	22	3282	7899	0.00670323	0.415495632	113.3333333	10/23/2001
5	Field Crop	1-Oct	2001	Oct	10	4	2001	B	4.5	3	295.3333333	0	0	6939	207733	303397	0.033403455	0.684690356	113.3333333	10/23/2001
7	Grains	1-Oct	2001	Oct	10	4	2001	B	4.5	3	295.3333333	0	0	2333	30804	33544	0.075736917	0.918316241	113.3333333	10/23/2001
11	Alfalfa	1-Oct	2001	Oct	10	4	2001	B	4.5	3	295.3333333	0	0	1232	34441	40265	0.035771319	0.855358252	113.3333333	10/23/2001
12	Rice	1-Oct	2001	Oct	10	4	2001	B	4.5	3	295.3333333	0	0	29986	279297	457898	0.107362413	0.609954619	113.3333333	10/23/2001
13	Row Crop	1-Oct	2001	Oct	10	4	2001	B	4.5	3	295.3333333	0	0	0	244	246	0	0.991869919	113.3333333	10/23/2001
99	Suitable-unassigned	1-Oct	2001	Oct	10	4	2001	B	4.5	3	295.3333333	0	0	2281	72145	94962	0.031616883	0.759724943	113.3333333	10/23/2001
100	Vineyard/Orchard	1-Oct	2001	Oct	10	4	2001	B	4.5	3	295.3333333	0	0	2123	117292	290723	0.018100126	0.403449331	113.3333333	10/23/2001
0	Unsuitable	2-Oct	2002	Oct	10	4	2002	A	4	3	282.3333333	0	0	65321	867523	867523	0.075295986	1	100.3333333	10/10/2002
0	Unsuitable	2-Oct	2002	Oct	10	4	2002	B	4.5	3	298.3333333	0	0	52418	867523	867523	0.060422606	1	116.3333333	10/26/2002
1	Grass/Pasture	2-Oct	2002	Oct	10	4	2002	A	4	3	282.3333333	0	0	10918	625708	625708	0.017449034	1	100.3333333	10/10/2002
1	Grass/Pasture	2-Oct	2002	Oct	10	4	2002	B	4.5	3	298.3333333	0	0	2721	625708	625708	0.004348674	1	116.3333333	10/26/2002
3	Corn	2-Oct	2002	Oct	10	4	2002	A	4	3	282.3333333	0	0	1491	7899	7899	0.188758071	1	100.3333333	10/10/2002
3	Corn	2-Oct	2002	Oct	10	4	2002	B	4.5	3	298.3333333	0	0	327	7899	7899	0.041397645	1	116.3333333	10/26/2002
5	Field Crop	2-Oct	2002	Oct	10	4	2002	A	4	3	282.3333333	0	0	18809	303397	303397	0.06199468	1	100.3333333	10/10/2002
5	Field Crop	2-Oct	2002	Oct	10	4	2002	B	4.5	3	298.3333333	0	0	13110	303397	303397	0.043210711	1	116.3333333	10/26/2002
7	Grains	2-Oct	2002	Oct	10	4	2002	A	4	3	282.3333333	0	0	3107	33544	33544	0.092624612	1	100.3333333	10/10/2002
7	Grains	2-Oct	2002	Oct	10	4	2002	B	4.5	3	298.3333333	0	0	798	33544	33544	0.023789649	1	116.3333333	10/26/2002
11	Alfalfa	2-Oct	2002	Oct	10	4	2002	A	4	3	282.3333333	0	0	2024	40265	40265	0.050266981	1	100.3333333	10/10/2002
11	Alfalfa	2-Oct	2002	Oct	10	4	2002	B	4.5	3	298.3333333	0	0	568	40265	40265	0.014106544	1	116.3333333	10/26/2002
12	Rice	2-Oct	2002	Oct	10	4	2002	A	4	3	282.3333333	0	0	51555	457898	457898	0.112590577	1	100.3333333	10/10/2002
12	Rice	2-Oct	2002	Oct	10	4	2002	B	4.5	3	298.3333333	0	0	98292	457898	457898	0.21465916	1	116.3333333	10/26/2002
13	Row Crop	2-Oct	2002	Oct	10	4	2002	A	4	3	282.3333333	0	0	8	246	246	0.032520325	1	100.3333333	10/10/2002
13	Row Crop	2-Oct	2002	Oct	10	4	2002	B	4.5	3	298.3333333	0	0	2	246	246	0.008130081	1	116.3333333	10/26/2002
99	Suitable-unassigned	2-Oct	2002	Oct	10	4	2002	A	4	3	282.3333333	0	0	5099	94962	94962	0.053695162	1	100.3333333	10/10/2002
99	Suitable-unassigned	2-Oct	2002	Oct	10	4	2002	B	4.5	3	298.3333333	0	0	2750	94962	94962	0.028958952	1	116.3333333	10/26/2002
100	Vineyard/Orchard	2-Oct	2002	Oct	10	4	2002	A	4	3	282.3333333	0	0	6870	290723	290723	0.023630741	1	100.3333333	10/10/2002
100	Vineyard/Orchard	2-Oct	2002	Oct	10	4	2002	B	4.5	3	298.3333333	0	0	5245	290723	290723	0.018041228	1	116.3333333	10/26/2002
0	Unsuitable	13-Nov	2013	Nov	11	5	2013	A	5	3	310.5	0	0	50334	863259	867523	0.058306951	0.995084857	128.5	11/7/2013
1	Grass/Pasture	13-Nov	2013	Nov	11	5	2013	A	5	3	310.5	0	0	956	619900	625708	0.001542184	0.990717715	128.5	11/7/2013
3	Corn	13-Nov	2013	Nov	11	5	2013	A	5	3	310.5	0	0	20	7899	7899	0.002531966	1	128.5	11/7/2013
5	Field Crop	13-Nov	2013	Nov	11	5	2013	A	5	3	310.5	0	0	8479	303397	303397	0.027946881	1	128.5	11/7/2013
7	Grains	13-Nov	2013	Nov	11	5	2013	A	5	3	310.5	0	0	334	33544	33544	0.009957071	1	128.5	11/7/2013
11	Alfalfa	13-Nov	2013	Nov	11	5	2013	A	5	3	310.5	0	0	104	40255	40265	0.00258353	0.999751645	128.5	11/7/2013
12	Rice	13-Nov	2013	Nov	11	5	2013	A	5	3	310.5	0	0	146631	457898	457898	0.320226339	1	128.5	11/7/2013
13	Row Crop	13-Nov	2013	Nov	11	5	2013	A	5	3	310.5	0	0	0	246	246	0	1	128.5	11/7/2013
99	Suitable-unassigned	13-Nov	2013	Nov	11	5	2013	A	5	3	310.5	0	0	1378	94958	94962	0.014511679	0.999957878	128.5	11/7/2013
100	Vineyard/Orchard	13-Nov	2013	Nov	11	5	2013	A	5	3	310.5	0	0	2440	290598	290723	0.008396479	0.999570037	128.5	11/7/2013
0	Unsuitable	14-Jan	2014	Jan	1	7	2013	A	7	4	14	0	0	29856	152950	152950	0.195201046	1	197	1/15/2014
1	Grass/Pasture	14-Jan	2014	Jan	1	7	2013	A	7	4	14	0	0	40	812	812	0.049261084	1	197	1/15/2014
3	Corn	14-Jan	2014	Jan	1	7	2013	A	7	4	14	0	0	46	16002	16002	0.002874641	1	197	1/15/2014
5	Field Crop	14-Jan	2014	Jan	1	7	2013	A	7	4	14	0	0	10178	125561	125561	0.081060202	1	197	1/15/2014
7	Grains	14-Jan	2014	Jan	1	7	2013	A	7	4	14	0	0	430	24758	24758	0.017368123	1	197	1/15/2014
11	Alfalfa	14-Jan	2014	Jan	1	7	2013	A	7	4	14	0	0	586	18271	18271	0.032072683	1	197	1/15/2014
12	Rice	14-Jan	2014	Jan	1	7	2013	A	7	4	14	0	0	159627	355273	355273	0.449307997	1	197	1/15/2014
13	Row Crop	14-Jan	2014	Jan	1	7	2013	A	7	4	14	0	0	22	9581	9581	0.002296211	1	197	1/15/2014
99	Suitable-unassigned	14-Jan	2014	Jan	1	7	2013	A	7	4	14	0	0	3458	62988	62988	0.054899346	1	197	1/15/2014
100	Vineyard/Orchard	14-Jan	2014	Jan	1	7	2013	A	7	4	14	0	0	6885	303376	303376	0.02269461	1	197	1/15/2014
0	Unsuitable	1-Jun	2001	Jun	6	12	2000	A	12	4	156.6666667	0	0	22483	152950	152950	0.14699575	1	339.6666667	6/6/2001
0	Unsuitable	1-Jun	2001	Jun	6	12	2000	B	12.5	4	170	0	0	20420	152950	152950	0.133507682	1	353	6/20/2001
1	Grass/Pasture	1-Jun	2001	Jun	6	12	2000	A	12	4	156.6666667	0	0	39	812	812	0.048029557	1	339.6666667	6/6/2001
1	Grass/Pasture	1-Jun	2001	Jun	6	12	2000	B	12.5	4	170	0	0	7	812	812	0.00862069	1	353	6/20/2001
3	Corn	1-Jun	2001	Jun	6	12	2000	A	12	4	156.6666667	0	0	1838	16002	16002	0.114860642	1	339.6666667	6/6/2001
3	Corn	1-Jun	2001	Jun	6	12	2000	B	12.5	4	170	0	0	1000	16002	16002	0.062492188	1	353	6/20/2001
5	Field Crop	1-Jun	2001	Jun	6	12	2000	A	12	4	156.6666667	0	0	19599	125561	125561	0.156091462	1	339.6666667	6/6/2001
5	Field Crop	1-Jun	2001	Jun	6	12	2000	B	12.5	4	170	0	0	6241	125561	125561	0.049704924	1	353	6/20/2001
7	Grains	1-Jun	2001	Jun	6	12	2000	A	12	4	156.6666667	0	0	1054	24758	24758	0.042572098	1	339.6666667	6/6/2001
7	Grains	1-Jun	2001	Jun	6	12	2000	B	12.5	4	170	0	0	1124	24758	24758	0.045399467	1	353	6/20/2001
11	Alfalfa	1-Jun	2001	Jun	6	12	2000	A	12	4	156.6666667	0	0	1205	18271	18271	0.065951508	1	339.6666667	6/6/2001
11	Alfalfa	1-Jun	2001	Jun	6	12	2000	B	12.5	4	170	0	0	386	18271	18271	0.021126375	1	353	6/20/2001
12	Rice	1-Jun	2001	Jun	6	12	2000	A	12	4	156.6666667	0	0	112999	355273	355273	0.318062448	1	339.6666667	6/6/2001
12	Rice	1-Jun	2001	Jun	6	12	2000	B	12.5	4	170	0	0	21055	355273	355273	0.059264284	1	353	6/20/2001
13	Row Crop	1-Jun	2001	Jun	6	12	2000	A	12	4	156.6666667	0	0	739	9581	9581	0.077131823	1	339.6666667	6/6/2001
13	Row Crop	1-Jun	2001	Jun	6	12	2000	B	12.5	4	170	0	0	164	9581	9581	0.017117211	1	353	6/20/2001
99	Suitable-unassigned	1-Jun	2001	Jun	6	12	2000	A	12	4	156.6666667	0	0	9319	62988	62988	0.147948816	1	339.6666667	6/6/2001
99	Suitable-unassigned	1-Jun	2001	Jun	6	12	2000	B	12.5	4	170	0	0	3727	62988	62988	0.059170001	1	353	6/20/2001
100	Vineyard/Orchard	1-Jun	2001	Jun	6	12	2000	A	12	4	156.6666667	0	0	7132	303376	303376	0.023508781	1	339.6666667	6/6/2001
100	Vineyard/Orchard	1-Jun	2001	Jun	6	12	2000	B	12.5	4	170	0	0	7216	303376	303376	0.023785665	1	353	6/20/2001
0	Unsuitable	2-Jun	2002	Jun	6	12	2001	B	12.5	4	175.6666667	0	0	21235	152950	152950	0.138836221	1	358.6666667	6/25/2002
1	Grass/Pasture	2-Jun	2002	Jun	6	12	2001	B	12.5	4	175.6666667	0	0	4	812	812	0.004926108	1	358.6666667	6/25/2002
3	Corn	2-Jun	2002	Jun	6	12	2001	B	12.5	4	175.6666667	0	0	471	16002	16002	0.029433821	1	358.6666667	6/25/2002
5	Field Crop	2-Jun	2002	Jun	6	12	2001	B	12.5	4	175.6666667	0	0	7307	125561	125561	0.058194822	1	358.6666667	6/25/2002
7	Grains	2-Jun	2002	Jun	6	12	2001	B	12.5	4	175.6666667	0	0	686	24758	24758	0.027708216	1	358.6666667	6/25/2002
11	Alfalfa	2-Jun	2002	Jun	6	12	2001	B	12.5	4	175.6666667	0	0	410	18271	18271	0.022439932	1	358.6666667	6/25/2002
12	Rice	2-Jun	2002	Jun	6	12	2001	B	12.5	4	175.6666667	0	0	14122	355273	355273	0.039749714	1	358.6666667	6/25/2002
13	Row Crop	2-Jun	2002	Jun	6	12	2001	B	12.5	4	175.6666667	0	0	188	9581	9581	0.019622169	1	358.6666667	6/25/2002
99	Suitable-unassigned	2-Jun	2002	Jun	6	12	2001	B	12.5	4	175.6666667	0	0	2200	62988	62988	0.034927288	1	358.6666667	6/25/2002
100	Vineyard/Orchard	2-Jun	2002	Jun	6	12	2001	B	12.5	4	175.6666667	0	0	8518	303376	303376	0.028077369	1	358.6666667	6/25/2002
0	Unsuitable	4-Jun	2004	Jun	6	12	2003	B	12.5	4	176.3333333	0	0	19695	152950	152950	0.128767571	1	359.3333333	6/25/2004
1	Grass/Pasture	4-Jun	2004	Jun	6	12	2003	B	12.5	4	176.3333333	0	0	6	812	812	0.007389163	1	359.3333333	6/25/2004
3	Corn	4-Jun	2004	Jun	6	12	2003	B	12.5	4	176.3333333	0	0	219	16002	16002	0.013685789	1	359.3333333	6/25/2004
5	Field Crop	4-Jun	2004	Jun	6	12	2003	B	12.5	4	176.3333333	0	0	5666	125561	125561	0.045125477	1	359.3333333	6/25/2004
7	Grains	4-Jun	2004	Jun	6	12	2003	B	12.5	4	176.3333333	0	0	1685	24758	24758	0.068058809	1	359.3333333	6/25/2004
11	Alfalfa	4-Jun	2004	Jun	6	12	2003	B	12.5	4	176.3333333	0	0	230	18271	18271	0.012588255	1	359.3333333	6/25/2004
12	Rice	4-Jun	2004	Jun	6	12	2003	B	12.5	4	176.3333333	0	0	5845	355273	355273	0.016452137	1	359.3333333	6/25/2004
13	Row Crop	4-Jun	2004	Jun	6	12	2003	B	12.5	4	176.3333333	0	0	234	9581	9581	0.024423338	1	359.3333333	6/25/2004
99	Suitable-unassigned	4-Jun	2004	Jun	6	12	2003	B	12.5	4	176.3333333	0	0	2261	62988	62988	0.035895726	1	359.3333333	6/25/2004
100	Vineyard/Orchard	4-Jun	2004	Jun	6	12	2003	B	12.5	4	176.3333333	0	0	5340	303376	303376	0.01760192	1	359.3333333	6/25/2004
0	Unsuitable	6-Jun	2006	Jun	6	12	2005	B	12.5	4	170.6666667	0	0	25747	152950	152950	0.168336058	1	353.6666667	6/20/2006
1	Grass/Pasture	6-Jun	2006	Jun	6	12	2005	B	12.5	4	170.6666667	0	0	8	812	812	0.009852217	1	353.6666667	6/20/2006
3	Corn	6-Jun	2006	Jun	6	12	2005	B	12.5	4	170.6666667	0	0	1577	16002	16002	0.098550181	1	353.6666667	6/20/2006
5	Field Crop	6-Jun	2006	Jun	6	12	2005	B	12.5	4	170.6666667	0	0	19582	125561	125561	0.155956069	1	353.6666667	6/20/2006
7	Grains	6-Jun	2006	Jun	6	12	2005	B	12.5	4	170.6666667	0	0	2361	24758	24758	0.095363115	1	353.6666667	6/20/2006
11	Alfalfa	6-Jun	2006	Jun	6	12	2005	B	12.5	4	170.6666667	0	0	133	18271	18271	0.007279295	1	353.6666667	6/20/2006
12	Rice	6-Jun	2006	Jun	6	12	2005	B	12.5	4	170.6666667	0	0	134950	355273	355273	0.379848736	1	353.6666667	6/20/2006
13	Row Crop	6-Jun	2006	Jun	6	12	2005	B	12.5	4	170.6666667	0	0	796	9581	9581	0.083081098	1	353.6666667	6/20/2006
99	Suitable-unassigned	6-Jun	2006	Jun	6	12	2005	B	12.5	4	170.6666667	0	0	11151	62988	62988	0.177033721	1	353.6666667	6/20/2006
100	Vineyard/Orchard	6-Jun	2006	Jun	6	12	2005	B	12.5	4	170.6666667	0	0	6535	303376	303376	0.021540926	1	353.6666667	6/20/2006
0	Unsuitable	10-Jun	2010	Jun	6	12	2009	B	12.5	4	176.3333333	0	0	22988	152950	152950	0.150297483	1	359.3333333	6/26/2010
1	Grass/Pasture	10-Jun	2010	Jun	6	12	2009	B	12.5	4	176.3333333	0	0	6	812	812	0.007389163	1	359.3333333	6/26/2010
3	Corn	10-Jun	2010	Jun	6	12	2009	B	12.5	4	176.3333333	0	0	155	16002	16002	0.009686289	1	359.3333333	6/26/2010
5	Field Crop	10-Jun	2010	Jun	6	12	2009	B	12.5	4	176.3333333	0	0	10100	125561	125561	0.08043899	1	359.3333333	6/26/2010
7	Grains	10-Jun	2010	Jun	6	12	2009	B	12.5	4	176.3333333	0	0	978	24758	24758	0.039502383	1	359.3333333	6/26/2010
11	Alfalfa	10-Jun	2010	Jun	6	12	2009	B	12.5	4	176.3333333	0	0	114	18271	18271	0.006239396	1	359.3333333	6/26/2010
12	Rice	10-Jun	2010	Jun	6	12	2009	B	12.5	4	176.3333333	0	0	76629	355273	355273	0.215690469	1	359.3333333	6/26/2010
13	Row Crop	10-Jun	2010	Jun	6	12	2009	B	12.5	4	176.3333333	0	0	294	9581	9581	0.030685732	1	359.3333333	6/26/2010
99	Suitable-unassigned	10-Jun	2010	Jun	6	12	2009	B	12.5	4	176.3333333	0	0	4044	62988	62988	0.064202705	1	359.3333333	6/26/2010
100	Vineyard/Orchard	10-Jun	2010	Jun	6	12	2009	B	12.5	4	176.3333333	0	0	6415	303376	303376	0.021145377	1	359.3333333	6/26/2010
0	Unsuitable	2-Jul	2002	Jul	7	1	2002	A	1	4	189	0	0	15316	84875	152950	0.180453608	0.554919908	7	7/9/2002
0	Unsuitable	2-Jul	2002	Jul	7	1	2002	B	1.5	4	202.3333333	0	0	15316	84875	152950	0.180453608	0.554919908	20.33333333	7/22/2002
1	Grass/Pasture	2-Jul	2002	Jul	7	1	2002	A	1	4	189	0	0	3	456	812	0.006578947	0.561576355	7	7/9/2002
1	Grass/Pasture	2-Jul	2002	Jul	7	1	2002	B	1.5	4	202.3333333	0	0	3	456	812	0.006578947	0.561576355	20.33333333	7/22/2002
3	Corn	2-Jul	2002	Jul	7	1	2002	A	1	4	189	0	0	895	15080	16002	0.059350133	0.942382202	7	7/9/2002
3	Corn	2-Jul	2002	Jul	7	1	2002	B	1.5	4	202.3333333	0	0	895	15080	16002	0.059350133	0.942382202	20.33333333	7/22/2002
5	Field Crop	2-Jul	2002	Jul	7	1	2002	A	1	4	189	0	0	6458	82720	125561	0.0780706	0.658803291	7	7/9/2002
5	Field Crop	2-Jul	2002	Jul	7	1	2002	B	1.5	4	202.3333333	0	0	6458	82720	125561	0.0780706	0.658803291	20.33333333	7/22/2002
7	Grains	2-Jul	2002	Jul	7	1	2002	A	1	4	189	0	0	1660	17374	24758	0.095545067	0.701752969	7	7/9/2002
7	Grains	2-Jul	2002	Jul	7	1	2002	B	1.5	4	202.3333333	0	0	1660	17374	24758	0.095545067	0.701752969	20.33333333	7/22/2002
11	Alfalfa	2-Jul	2002	Jul	7	1	2002	A	1	4	189	0	0	705	14420	18271	0.04889043	0.789228833	7	7/9/2002
11	Alfalfa	2-Jul	2002	Jul	7	1	2002	B	1.5	4	202.3333333	0	0	705	14420	18271	0.04889043	0.789228833	20.33333333	7/22/2002
12	Rice	2-Jul	2002	Jul	7	1	2002	A	1	4	189	0	0	49579	274631	355273	0.180529511	0.773013992	7	7/9/2002
12	Rice	2-Jul	2002	Jul	7	1	2002	B	1.5	4	202.3333333	0	0	49579	274631	355273	0.180529511	0.773013992	20.33333333	7/22/2002
13	Row Crop	2-Jul	2002	Jul	7	1	2002	A	1	4	189	0	0	365	6890	9581	0.052975327	0.719131615	7	7/9/2002
13	Row Crop	2-Jul	2002	Jul	7	1	2002	B	1.5	4	202.3333333	0	0	365	6890	9581	0.052975327	0.719131615	20.33333333	7/22/2002
99	Suitable-unassigned	2-Jul	2002	Jul	7	1	2002	A	1	4	189	0	0	2865	44307	62988	0.064662469	0.703419699	7	7/9/2002
99	Suitable-unassigned	2-Jul	2002	Jul	7	1	2002	B	1.5	4	202.3333333	0	0	2865	44307	62988	0.064662469	0.703419699	20.33333333	7/22/2002
100	Vineyard/Orchard	2-Jul	2002	Jul	7	1	2002	A	1	4	189	0	0	6790	177185	303376	0.038321528	0.584044222	7	7/9/2002
100	Vineyard/Orchard	2-Jul	2002	Jul	7	1	2002	B	1.5	4	202.3333333	0	0	6790	177185	303376	0.038321528	0.584044222	20.33333333	7/22/2002
0	Unsuitable	3-Jul	2003	Jul	7	1	2003	A	1	4	189.3333333	0	0	21769	152950	152950	0.142327558	1	7.333333333	7/9/2003
1	Grass/Pasture	3-Jul	2003	Jul	7	1	2003	A	1	4	189.3333333	0	0	5	812	812	0.006157635	1	7.333333333	7/9/2003
3	Corn	3-Jul	2003	Jul	7	1	2003	A	1	4	189.3333333	0	0	718	16002	16002	0.044869391	1	7.333333333	7/9/2003
5	Field Crop	3-Jul	2003	Jul	7	1	2003	A	1	4	189.3333333	0	0	5708	125561	125561	0.045459976	1	7.333333333	7/9/2003
7	Grains	3-Jul	2003	Jul	7	1	2003	A	1	4	189.3333333	0	0	863	24758	24758	0.03485742	1	7.333333333	7/9/2003
11	Alfalfa	3-Jul	2003	Jul	7	1	2003	A	1	4	189.3333333	0	0	138	18271	18271	0.007552953	1	7.333333333	7/9/2003
12	Rice	3-Jul	2003	Jul	7	1	2003	A	1	4	189.3333333	0	0	8227	355273	355273	0.02315684	1	7.333333333	7/9/2003
13	Row Crop	3-Jul	2003	Jul	7	1	2003	A	1	4	189.3333333	0	0	232	9581	9581	0.024214591	1	7.333333333	7/9/2003
99	Suitable-unassigned	3-Jul	2003	Jul	7	1	2003	A	1	4	189.3333333	0	0	2572	62988	62988	0.040833175	1	7.333333333	7/9/2003
100	Vineyard/Orchard	3-Jul	2003	Jul	7	1	2003	A	1	4	189.3333333	0	0	7937	303376	303376	0.026162254	1	7.333333333	7/9/2003
0	Unsuitable	4-Jul	2004	Jul	7	1	2004	A	1	4	192.3333333	0	0	21499	152950	152950	0.140562275	1	9.333333333	7/11/2004
1	Grass/Pasture	4-Jul	2004	Jul	7	1	2004	A	1	4	192.3333333	0	0	17	812	812	0.020935961	1	9.333333333	7/11/2004
3	Corn	4-Jul	2004	Jul	7	1	2004	A	1	4	192.3333333	0	0	173	16002	16002	0.010811149	1	9.333333333	7/11/2004
5	Field Crop	4-Jul	2004	Jul	7	1	2004	A	1	4	192.3333333	0	0	5272	125561	125561	0.04198756	1	9.333333333	7/11/2004
7	Grains	4-Jul	2004	Jul	7	1	2004	A	1	4	192.3333333	0	0	950	24758	24758	0.038371435	1	9.333333333	7/11/2004
11	Alfalfa	4-Jul	2004	Jul	7	1	2004	A	1	4	192.3333333	0	0	150	18271	18271	0.008209731	1	9.333333333	7/11/2004
12	Rice	4-Jul	2004	Jul	7	1	2004	A	1	4	192.3333333	0	0	3747	355273	355273	0.010546819	1	9.333333333	7/11/2004
13	Row Crop	4-Jul	2004	Jul	7	1	2004	A	1	4	192.3333333	0	0	296	9581	9581	0.030894479	1	9.333333333	7/11/2004
99	Suitable-unassigned	4-Jul	2004	Jul	7	1	2004	A	1	4	192.3333333	0	0	1426	62988	62988	0.022639233	1	9.333333333	7/11/2004
100	Vineyard/Orchard	4-Jul	2004	Jul	7	1	2004	A	1	4	192.3333333	0	0	7335	303376	303376	0.024177918	1	9.333333333	7/11/2004
0	Unsuitable	5-Jul	2005	Jul	7	1	2005	B	1.5	4	205	0	0	18259	152950	152950	0.119378882	1	23	7/25/2005
1	Grass/Pasture	5-Jul	2005	Jul	7	1	2005	B	1.5	4	205	0	0	8	812	812	0.009852217	1	23	7/25/2005
3	Corn	5-Jul	2005	Jul	7	1	2005	B	1.5	4	205	0	0	24	16002	16002	0.001499813	1	23	7/25/2005
5	Field Crop	5-Jul	2005	Jul	7	1	2005	B	1.5	4	205	0	0	3719	125561	125561	0.02961907	1	23	7/25/2005
7	Grains	5-Jul	2005	Jul	7	1	2005	B	1.5	4	205	0	0	318	24758	24758	0.012844333	1	23	7/25/2005
11	Alfalfa	5-Jul	2005	Jul	7	1	2005	B	1.5	4	205	0	0	136	18271	18271	0.00744349	1	23	7/25/2005
12	Rice	5-Jul	2005	Jul	7	1	2005	B	1.5	4	205	0	0	1503	355273	355273	0.004230549	1	23	7/25/2005
13	Row Crop	5-Jul	2005	Jul	7	1	2005	B	1.5	4	205	0	0	74	9581	9581	0.00772362	1	23	7/25/2005
99	Suitable-unassigned	5-Jul	2005	Jul	7	1	2005	B	1.5	4	205	0	0	698	62988	62988	0.011081476	1	23	7/25/2005
100	Vineyard/Orchard	5-Jul	2005	Jul	7	1	2005	B	1.5	4	205	0	0	2951	303376	303376	0.009727203	1	23	7/25/2005
0	Unsuitable	6-Jul	2006	Jul	7	1	2006	B	1.5	4	202.6666667	0	0	21116	152950	152950	0.138058189	1	20.66666667	7/22/2006
1	Grass/Pasture	6-Jul	2006	Jul	7	1	2006	B	1.5	4	202.6666667	0	0	7	812	812	0.00862069	1	20.66666667	7/22/2006
3	Corn	6-Jul	2006	Jul	7	1	2006	B	1.5	4	202.6666667	0	0	182	16002	16002	0.011373578	1	20.66666667	7/22/2006
5	Field Crop	6-Jul	2006	Jul	7	1	2006	B	1.5	4	202.6666667	0	0	5211	125561	125561	0.04150174	1	20.66666667	7/22/2006
7	Grains	6-Jul	2006	Jul	7	1	2006	B	1.5	4	202.6666667	0	0	637	24758	24758	0.025729057	1	20.66666667	7/22/2006
11	Alfalfa	6-Jul	2006	Jul	7	1	2006	B	1.5	4	202.6666667	0	0	119	18271	18271	0.006513053	1	20.66666667	7/22/2006
12	Rice	6-Jul	2006	Jul	7	1	2006	B	1.5	4	202.6666667	0	0	2889	355273	355273	0.008131775	1	20.66666667	7/22/2006
13	Row Crop	6-Jul	2006	Jul	7	1	2006	B	1.5	4	202.6666667	0	0	34	9581	9581	0.00354869	1	20.66666667	7/22/2006
99	Suitable-unassigned	6-Jul	2006	Jul	7	1	2006	B	1.5	4	202.6666667	0	0	1217	62988	62988	0.019321141	1	20.66666667	7/22/2006
100	Vineyard/Orchard	6-Jul	2006	Jul	7	1	2006	B	1.5	4	202.6666667	0	0	6920	303376	303376	0.022809978	1	20.66666667	7/22/2006
0	Unsuitable	7-Jul	2007	Jul	7	1	2007	A	1	4	189.6666667	0	0	23612	152950	152950	0.154377247	1	7.666666667	7/9/2007
0	Unsuitable	7-Jul	2007	Jul	7	1	2007	B	1.5	4	205.6666667	0	0	22559	152950	152950	0.147492645	1	23.66666667	7/25/2007
1	Grass/Pasture	7-Jul	2007	Jul	7	1	2007	A	1	4	189.6666667	0	0	9	812	812	0.011083744	1	7.666666667	7/9/2007
1	Grass/Pasture	7-Jul	2007	Jul	7	1	2007	B	1.5	4	205.6666667	0	0	5	812	812	0.006157635	1	23.66666667	7/25/2007
3	Corn	7-Jul	2007	Jul	7	1	2007	A	1	4	189.6666667	0	0	407	16002	16002	0.025434321	1	7.666666667	7/9/2007
3	Corn	7-Jul	2007	Jul	7	1	2007	B	1.5	4	205.6666667	0	0	141	16002	16002	0.008811399	1	23.66666667	7/25/2007
5	Field Crop	7-Jul	2007	Jul	7	1	2007	A	1	4	189.6666667	0	0	9141	125561	125561	0.072801268	1	7.666666667	7/9/2007
5	Field Crop	7-Jul	2007	Jul	7	1	2007	B	1.5	4	205.6666667	0	0	6853	125561	125561	0.054579049	1	23.66666667	7/25/2007
7	Grains	7-Jul	2007	Jul	7	1	2007	A	1	4	189.6666667	0	0	1098	24758	24758	0.044349301	1	7.666666667	7/9/2007
7	Grains	7-Jul	2007	Jul	7	1	2007	B	1.5	4	205.6666667	0	0	554	24758	24758	0.022376606	1	23.66666667	7/25/2007
11	Alfalfa	7-Jul	2007	Jul	7	1	2007	A	1	4	189.6666667	0	0	116	18271	18271	0.006348859	1	7.666666667	7/9/2007
11	Alfalfa	7-Jul	2007	Jul	7	1	2007	B	1.5	4	205.6666667	0	0	67	18271	18271	0.003667013	1	23.66666667	7/25/2007
12	Rice	7-Jul	2007	Jul	7	1	2007	A	1	4	189.6666667	0	0	12044	355273	355273	0.03390069	1	7.666666667	7/9/2007
12	Rice	7-Jul	2007	Jul	7	1	2007	B	1.5	4	205.6666667	0	0	4211	355273	355273	0.011852857	1	23.66666667	7/25/2007
13	Row Crop	7-Jul	2007	Jul	7	1	2007	A	1	4	189.6666667	0	0	295	9581	9581	0.030790105	1	7.666666667	7/9/2007
13	Row Crop	7-Jul	2007	Jul	7	1	2007	B	1.5	4	205.6666667	0	0	195	9581	9581	0.020352782	1	23.66666667	7/25/2007
99	Suitable-unassigned	7-Jul	2007	Jul	7	1	2007	A	1	4	189.6666667	0	0	2804	62988	62988	0.044516416	1	7.666666667	7/9/2007
99	Suitable-unassigned	7-Jul	2007	Jul	7	1	2007	B	1.5	4	205.6666667	0	0	1817	62988	62988	0.028846764	1	23.66666667	7/25/2007
100	Vineyard/Orchard	7-Jul	2007	Jul	7	1	2007	A	1	4	189.6666667	0	0	5923	303376	303376	0.019523627	1	7.666666667	7/9/2007
100	Vineyard/Orchard	7-Jul	2007	Jul	7	1	2007	B	1.5	4	205.6666667	0	0	5690	303376	303376	0.018755604	1	23.66666667	7/25/2007
0	Unsuitable	8-Jul	2008	Jul	7	1	2008	A	1	4	190	0	0	21997	152950	152950	0.143818241	1	7	7/9/2008
0	Unsuitable	8-Jul	2008	Jul	7	1	2008	B	1.5	4	203.3333333	0	0	19316	152950	152950	0.126289637	1	20.33333333	7/22/2008
1	Grass/Pasture	8-Jul	2008	Jul	7	1	2008	A	1	4	190	0	0	7	812	812	0.00862069	1	7	7/9/2008
1	Grass/Pasture	8-Jul	2008	Jul	7	1	2008	B	1.5	4	203.3333333	0	0	4	812	812	0.004926108	1	20.33333333	7/22/2008
3	Corn	8-Jul	2008	Jul	7	1	2008	A	1	4	190	0	0	666	16002	16002	0.041619798	1	7	7/9/2008
3	Corn	8-Jul	2008	Jul	7	1	2008	B	1.5	4	203.3333333	0	0	182	16002	16002	0.011373578	1	20.33333333	7/22/2008
5	Field Crop	8-Jul	2008	Jul	7	1	2008	A	1	4	190	0	0	6982	125561	125561	0.055606438	1	7	7/9/2008
5	Field Crop	8-Jul	2008	Jul	7	1	2008	B	1.5	4	203.3333333	0	0	4479	125561	125561	0.035671904	1	20.33333333	7/22/2008
7	Grains	8-Jul	2008	Jul	7	1	2008	A	1	4	190	0	0	1075	24758	24758	0.043420309	1	7	7/9/2008
7	Grains	8-Jul	2008	Jul	7	1	2008	B	1.5	4	203.3333333	0	0	431	24758	24758	0.017408514	1	20.33333333	7/22/2008
11	Alfalfa	8-Jul	2008	Jul	7	1	2008	A	1	4	190	0	0	389	18271	18271	0.02129057	1	7	7/9/2008
11	Alfalfa	8-Jul	2008	Jul	7	1	2008	B	1.5	4	203.3333333	0	0	282	18271	18271	0.015434295	1	20.33333333	7/22/2008
12	Rice	8-Jul	2008	Jul	7	1	2008	A	1	4	190	0	0	16399	355273	355273	0.046158869	1	7	7/9/2008
12	Rice	8-Jul	2008	Jul	7	1	2008	B	1.5	4	203.3333333	0	0	2974	355273	355273	0.008371027	1	20.33333333	7/22/2008
13	Row Crop	8-Jul	2008	Jul	7	1	2008	A	1	4	190	0	0	332	9581	9581	0.034651915	1	7	7/9/2008
13	Row Crop	8-Jul	2008	Jul	7	1	2008	B	1.5	4	203.3333333	0	0	292	9581	9581	0.030476986	1	20.33333333	7/22/2008
99	Suitable-unassigned	8-Jul	2008	Jul	7	1	2008	A	1	4	190	0	0	2954	62988	62988	0.046897822	1	7	7/9/2008
99	Suitable-unassigned	8-Jul	2008	Jul	7	1	2008	B	1.5	4	203.3333333	0	0	951	62988	62988	0.015098114	1	20.33333333	7/22/2008
100	Vineyard/Orchard	8-Jul	2008	Jul	7	1	2008	A	1	4	190	0	0	7403	303376	303376	0.024402062	1	7	7/9/2008
100	Vineyard/Orchard	8-Jul	2008	Jul	7	1	2008	B	1.5	4	203.3333333	0	0	4326	303376	303376	0.014259533	1	20.33333333	7/22/2008
0	Unsuitable	9-Jul	2009	Jul	7	1	2009	A	1	4	189.3333333	0	0	19640	152950	152950	0.128407976	1	7.333333333	7/9/2009
0	Unsuitable	9-Jul	2009	Jul	7	1	2009	B	1.5	4	205.3333333	0	0	20676	152950	152950	0.135181432	1	23.33333333	7/25/2009
1	Grass/Pasture	9-Jul	2009	Jul	7	1	2009	A	1	4	189.3333333	0	0	5	812	812	0.006157635	1	7.333333333	7/9/2009
1	Grass/Pasture	9-Jul	2009	Jul	7	1	2009	B	1.5	4	205.3333333	0	0	7	812	812	0.00862069	1	23.33333333	7/25/2009
3	Corn	9-Jul	2009	Jul	7	1	2009	A	1	4	189.3333333	0	0	95	16002	16002	0.005936758	1	7.333333333	7/9/2009
3	Corn	9-Jul	2009	Jul	7	1	2009	B	1.5	4	205.3333333	0	0	123	16002	16002	0.007686539	1	23.33333333	7/25/2009
5	Field Crop	9-Jul	2009	Jul	7	1	2009	A	1	4	189.3333333	0	0	5120	125561	125561	0.040776993	1	7.333333333	7/9/2009
5	Field Crop	9-Jul	2009	Jul	7	1	2009	B	1.5	4	205.3333333	0	0	5835	125561	125561	0.046471436	1	23.33333333	7/25/2009
7	Grains	9-Jul	2009	Jul	7	1	2009	A	1	4	189.3333333	0	0	1797	24758	24758	0.0725826	1	7.333333333	7/9/2009
7	Grains	9-Jul	2009	Jul	7	1	2009	B	1.5	4	205.3333333	0	0	261	24758	24758	0.010542047	1	23.33333333	7/25/2009
11	Alfalfa	9-Jul	2009	Jul	7	1	2009	A	1	4	189.3333333	0	0	25	18271	18271	0.001368289	1	7.333333333	7/9/2009
11	Alfalfa	9-Jul	2009	Jul	7	1	2009	B	1.5	4	205.3333333	0	0	213	18271	18271	0.011657818	1	23.33333333	7/25/2009
12	Rice	9-Jul	2009	Jul	7	1	2009	A	1	4	189.3333333	0	0	3694	355273	355273	0.010397638	1	7.333333333	7/9/2009
12	Rice	9-Jul	2009	Jul	7	1	2009	B	1.5	4	205.3333333	0	0	3399	355273	355273	0.009567291	1	23.33333333	7/25/2009
13	Row Crop	9-Jul	2009	Jul	7	1	2009	A	1	4	189.3333333	0	0	167	9581	9581	0.017430331	1	7.333333333	7/9/2009
13	Row Crop	9-Jul	2009	Jul	7	1	2009	B	1.5	4	205.3333333	0	0	31	9581	9581	0.00323557	1	23.33333333	7/25/2009
99	Suitable-unassigned	9-Jul	2009	Jul	7	1	2009	A	1	4	189.3333333	0	0	1570	62988	62988	0.024925383	1	7.333333333	7/9/2009
99	Suitable-unassigned	9-Jul	2009	Jul	7	1	2009	B	1.5	4	205.3333333	0	0	1455	62988	62988	0.023099638	1	23.33333333	7/25/2009
100	Vineyard/Orchard	9-Jul	2009	Jul	7	1	2009	A	1	4	189.3333333	0	0	4316	303376	303376	0.01422657	1	7.333333333	7/9/2009
100	Vineyard/Orchard	9-Jul	2009	Jul	7	1	2009	B	1.5	4	205.3333333	0	0	4601	303376	303376	0.015165999	1	23.33333333	7/25/2009
0	Unsuitable	10-Jul	2010	Jul	7	1	2010	B	1.5	4	208.3333333	0	0	21173	152950	152950	0.13843086	1	26.33333333	7/28/2010
1	Grass/Pasture	10-Jul	2010	Jul	7	1	2010	B	1.5	4	208.3333333	0	0	12	812	812	0.014778325	1	26.33333333	7/28/2010
3	Corn	10-Jul	2010	Jul	7	1	2010	B	1.5	4	208.3333333	0	0	66	16002	16002	0.004124484	1	26.33333333	7/28/2010
5	Field Crop	10-Jul	2010	Jul	7	1	2010	B	1.5	4	208.3333333	0	0	5812	125561	125561	0.046288258	1	26.33333333	7/28/2010
7	Grains	10-Jul	2010	Jul	7	1	2010	B	1.5	4	208.3333333	0	0	300	24758	24758	0.012117295	1	26.33333333	7/28/2010
11	Alfalfa	10-Jul	2010	Jul	7	1	2010	B	1.5	4	208.3333333	0	0	80	18271	18271	0.004378523	1	26.33333333	7/28/2010
12	Rice	10-Jul	2010	Jul	7	1	2010	B	1.5	4	208.3333333	0	0	2467	355273	355273	0.006943956	1	26.33333333	7/28/2010
13	Row Crop	10-Jul	2010	Jul	7	1	2010	B	1.5	4	208.3333333	0	0	629	9581	9581	0.065650767	1	26.33333333	7/28/2010
99	Suitable-unassigned	10-Jul	2010	Jul	7	1	2010	B	1.5	4	208.3333333	0	0	1457	62988	62988	0.02313139	1	26.33333333	7/28/2010
100	Vineyard/Orchard	10-Jul	2010	Jul	7	1	2010	B	1.5	4	208.3333333	0	0	5612	303376	303376	0.018498497	1	26.33333333	7/28/2010
0	Unsuitable	1-Aug	2001	Aug	8	2	2001	B	2.5	4	236.6666667	0	0	20083	152950	152950	0.131304348	1	54.66666667	8/25/2001
1	Grass/Pasture	1-Aug	2001	Aug	8	2	2001	B	2.5	4	236.6666667	0	0	8	812	812	0.009852217	1	54.66666667	8/25/2001
3	Corn	1-Aug	2001	Aug	8	2	2001	B	2.5	4	236.6666667	0	0	323	16002	16002	0.020184977	1	54.66666667	8/25/2001
5	Field Crop	1-Aug	2001	Aug	8	2	2001	B	2.5	4	236.6666667	0	0	4318	125561	125561	0.034389659	1	54.66666667	8/25/2001
7	Grains	1-Aug	2001	Aug	8	2	2001	B	2.5	4	236.6666667	0	0	210	24758	24758	0.008482107	1	54.66666667	8/25/2001
11	Alfalfa	1-Aug	2001	Aug	8	2	2001	B	2.5	4	236.6666667	0	0	236	18271	18271	0.012916644	1	54.66666667	8/25/2001
12	Rice	1-Aug	2001	Aug	8	2	2001	B	2.5	4	236.6666667	0	0	4352	355273	355273	0.012249735	1	54.66666667	8/25/2001
13	Row Crop	1-Aug	2001	Aug	8	2	2001	B	2.5	4	236.6666667	0	0	205	9581	9581	0.021396514	1	54.66666667	8/25/2001
99	Suitable-unassigned	1-Aug	2001	Aug	8	2	2001	B	2.5	4	236.6666667	0	0	1183	62988	62988	0.018781355	1	54.66666667	8/25/2001
100	Vineyard/Orchard	1-Aug	2001	Aug	8	2	2001	B	2.5	4	236.6666667	0	0	4956	303376	303376	0.016336164	1	54.66666667	8/25/2001
0	Unsuitable	2-Aug	2002	Aug	8	2	2002	A	2	4	218.3333333	0	0	21136	152950	152950	0.138188951	1	36.33333333	8/7/2002
1	Grass/Pasture	2-Aug	2002	Aug	8	2	2002	A	2	4	218.3333333	0	0	3	812	812	0.003694581	1	36.33333333	8/7/2002
3	Corn	2-Aug	2002	Aug	8	2	2002	A	2	4	218.3333333	0	0	319	16002	16002	0.019935008	1	36.33333333	8/7/2002
5	Field Crop	2-Aug	2002	Aug	8	2	2002	A	2	4	218.3333333	0	0	5068	125561	125561	0.040362852	1	36.33333333	8/7/2002
7	Grains	2-Aug	2002	Aug	8	2	2002	A	2	4	218.3333333	0	0	212	24758	24758	0.008562889	1	36.33333333	8/7/2002
11	Alfalfa	2-Aug	2002	Aug	8	2	2002	A	2	4	218.3333333	0	0	208	18271	18271	0.011384161	1	36.33333333	8/7/2002
12	Rice	2-Aug	2002	Aug	8	2	2002	A	2	4	218.3333333	0	0	3802	355273	355273	0.010701629	1	36.33333333	8/7/2002
13	Row Crop	2-Aug	2002	Aug	8	2	2002	A	2	4	218.3333333	0	0	61	9581	9581	0.006366768	1	36.33333333	8/7/2002
99	Suitable-unassigned	2-Aug	2002	Aug	8	2	2002	A	2	4	218.3333333	0	0	1043	62988	62988	0.01655871	1	36.33333333	8/7/2002
100	Vineyard/Orchard	2-Aug	2002	Aug	8	2	2002	A	2	4	218.3333333	0	0	5056	303376	303376	0.016665788	1	36.33333333	8/7/2002
0	Unsuitable	4-Aug	2004	Aug	8	2	2004	A	2	4	222.5	0	0	21704	152950	152950	0.141902583	1	39.5	8/10/2004
0	Unsuitable	4-Aug	2004	Aug	8	2	2004	B	2.5	4	238.5	0	0	21289	152950	152950	0.139189278	1	55.5	8/26/2004
1	Grass/Pasture	4-Aug	2004	Aug	8	2	2004	A	2	4	222.5	0	0	8	812	812	0.009852217	1	39.5	8/10/2004
1	Grass/Pasture	4-Aug	2004	Aug	8	2	2004	B	2.5	4	238.5	0	0	4	812	812	0.004926108	1	55.5	8/26/2004
3	Corn	4-Aug	2004	Aug	8	2	2004	A	2	4	222.5	0	0	374	16002	16002	0.023372078	1	39.5	8/10/2004
3	Corn	4-Aug	2004	Aug	8	2	2004	B	2.5	4	238.5	0	0	167	16002	16002	0.010436195	1	55.5	8/26/2004
5	Field Crop	4-Aug	2004	Aug	8	2	2004	A	2	4	222.5	0	0	5235	125561	125561	0.041692882	1	39.5	8/10/2004
5	Field Crop	4-Aug	2004	Aug	8	2	2004	B	2.5	4	238.5	0	0	4541	125561	125561	0.036165688	1	55.5	8/26/2004
7	Grains	4-Aug	2004	Aug	8	2	2004	A	2	4	222.5	0	0	1244	24758	24758	0.050246385	1	39.5	8/10/2004
7	Grains	4-Aug	2004	Aug	8	2	2004	B	2.5	4	238.5	0	0	600	24758	24758	0.024234591	1	55.5	8/26/2004
11	Alfalfa	4-Aug	2004	Aug	8	2	2004	A	2	4	222.5	0	0	62	18271	18271	0.003393356	1	39.5	8/10/2004
11	Alfalfa	4-Aug	2004	Aug	8	2	2004	B	2.5	4	238.5	0	0	104	18271	18271	0.00569208	1	55.5	8/26/2004
12	Rice	4-Aug	2004	Aug	8	2	2004	A	2	4	222.5	0	0	2684	355273	355273	0.007554754	1	39.5	8/10/2004
12	Rice	4-Aug	2004	Aug	8	2	2004	B	2.5	4	238.5	0	0	1697	355273	355273	0.004776608	1	55.5	8/26/2004
13	Row Crop	4-Aug	2004	Aug	8	2	2004	A	2	4	222.5	0	0	112	9581	9581	0.011689803	1	39.5	8/10/2004
13	Row Crop	4-Aug	2004	Aug	8	2	2004	B	2.5	4	238.5	0	0	75	9581	9581	0.007827993	1	55.5	8/26/2004
99	Suitable-unassigned	4-Aug	2004	Aug	8	2	2004	A	2	4	222.5	0	0	1300	62988	62988	0.020638852	1	39.5	8/10/2004
99	Suitable-unassigned	4-Aug	2004	Aug	8	2	2004	B	2.5	4	238.5	0	0	760	62988	62988	0.01206579	1	55.5	8/26/2004
100	Vineyard/Orchard	4-Aug	2004	Aug	8	2	2004	A	2	4	222.5	0	0	5150	303376	303376	0.016975634	1	39.5	8/10/2004
100	Vineyard/Orchard	4-Aug	2004	Aug	8	2	2004	B	2.5	4	238.5	0	0	6215	303376	303376	0.020486129	1	55.5	8/26/2004
0	Unsuitable	5-Aug	2005	Aug	8	2	2005	B	2.5	4	231.6666667	0	0	17135	149493	152950	0.114620751	0.977397842	49.66666667	8/20/2005
1	Grass/Pasture	5-Aug	2005	Aug	8	2	2005	B	2.5	4	231.6666667	0	0	7	808	812	0.008663366	0.995073892	49.66666667	8/20/2005
3	Corn	5-Aug	2005	Aug	8	2	2005	B	2.5	4	231.6666667	0	0	142	16002	16002	0.008873891	1	49.66666667	8/20/2005
5	Field Crop	5-Aug	2005	Aug	8	2	2005	B	2.5	4	231.6666667	0	0	4858	124478	125561	0.039026977	0.99137471	49.66666667	8/20/2005
7	Grains	5-Aug	2005	Aug	8	2	2005	B	2.5	4	231.6666667	0	0	574	24758	24758	0.023184425	1	49.66666667	8/20/2005
11	Alfalfa	5-Aug	2005	Aug	8	2	2005	B	2.5	4	231.6666667	0	0	152	18184	18271	0.008358997	0.995238356	49.66666667	8/20/2005
12	Rice	5-Aug	2005	Aug	8	2	2005	B	2.5	4	231.6666667	0	0	1838	354396	355273	0.005186289	0.997531476	49.66666667	8/20/2005
13	Row Crop	5-Aug	2005	Aug	8	2	2005	B	2.5	4	231.6666667	0	0	62	9581	9581	0.006471141	1	49.66666667	8/20/2005
99	Suitable-unassigned	5-Aug	2005	Aug	8	2	2005	B	2.5	4	231.6666667	0	0	990	62934	62988	0.015730766	0.999142694	49.66666667	8/20/2005
100	Vineyard/Orchard	5-Aug	2005	Aug	8	2	2005	B	2.5	4	231.6666667	0	0	2416	291075	303376	0.008300266	0.959452956	49.66666667	8/20/2005
0	Unsuitable	6-Aug	2006	Aug	8	2	2006	A	2	4	218.6666667	0	0	20657	152950	152950	0.135057208	1	36.66666667	8/7/2006
1	Grass/Pasture	6-Aug	2006	Aug	8	2	2006	A	2	4	218.6666667	0	0	10	812	812	0.012315271	1	36.66666667	8/7/2006
3	Corn	6-Aug	2006	Aug	8	2	2006	A	2	4	218.6666667	0	0	122	16002	16002	0.007624047	1	36.66666667	8/7/2006
5	Field Crop	6-Aug	2006	Aug	8	2	2006	A	2	4	218.6666667	0	0	4580	125561	125561	0.036476294	1	36.66666667	8/7/2006
7	Grains	6-Aug	2006	Aug	8	2	2006	A	2	4	218.6666667	0	0	481	24758	24758	0.019428064	1	36.66666667	8/7/2006
11	Alfalfa	6-Aug	2006	Aug	8	2	2006	A	2	4	218.6666667	0	0	185	18271	18271	0.010125335	1	36.66666667	8/7/2006
12	Rice	6-Aug	2006	Aug	8	2	2006	A	2	4	218.6666667	0	0	1705	355273	355273	0.004799126	1	36.66666667	8/7/2006
13	Row Crop	6-Aug	2006	Aug	8	2	2006	A	2	4	218.6666667	0	0	42	9581	9581	0.004383676	1	36.66666667	8/7/2006
99	Suitable-unassigned	6-Aug	2006	Aug	8	2	2006	A	2	4	218.6666667	0	0	806	62988	62988	0.012796088	1	36.66666667	8/7/2006
100	Vineyard/Orchard	6-Aug	2006	Aug	8	2	2006	A	2	4	218.6666667	0	0	5274	303376	303376	0.017384368	1	36.66666667	8/7/2006
0	Unsuitable	7-Aug	2007	Aug	8	2	2007	B	2.5	4	237.6666667	0	0	21069	152950	152950	0.137750899	1	55.66666667	8/26/2007
1	Grass/Pasture	7-Aug	2007	Aug	8	2	2007	B	2.5	4	237.6666667	0	0	4	812	812	0.004926108	1	55.66666667	8/26/2007
3	Corn	7-Aug	2007	Aug	8	2	2007	B	2.5	4	237.6666667	0	0	258	16002	16002	0.016122985	1	55.66666667	8/26/2007
5	Field Crop	7-Aug	2007	Aug	8	2	2007	B	2.5	4	237.6666667	0	0	5140	125561	125561	0.040936278	1	55.66666667	8/26/2007
7	Grains	7-Aug	2007	Aug	8	2	2007	B	2.5	4	237.6666667	0	0	658	24758	24758	0.026577268	1	55.66666667	8/26/2007
11	Alfalfa	7-Aug	2007	Aug	8	2	2007	B	2.5	4	237.6666667	0	0	145	18271	18271	0.007936074	1	55.66666667	8/26/2007
12	Rice	7-Aug	2007	Aug	8	2	2007	B	2.5	4	237.6666667	0	0	1711	355273	355273	0.004816015	1	55.66666667	8/26/2007
13	Row Crop	7-Aug	2007	Aug	8	2	2007	B	2.5	4	237.6666667	0	0	135	9581	9581	0.014090387	1	55.66666667	8/26/2007
99	Suitable-unassigned	7-Aug	2007	Aug	8	2	2007	B	2.5	4	237.6666667	0	0	1267	62988	62988	0.020114943	1	55.66666667	8/26/2007
100	Vineyard/Orchard	7-Aug	2007	Aug	8	2	2007	B	2.5	4	237.6666667	0	0	3607	303376	303376	0.011889536	1	55.66666667	8/26/2007
0	Unsuitable	8-Aug	2008	Aug	8	2	2008	B	2.5	4	235.3333333	0	0	21790	152950	152950	0.142464858	1	52.33333333	8/23/2008
1	Grass/Pasture	8-Aug	2008	Aug	8	2	2008	B	2.5	4	235.3333333	0	0	5	812	812	0.006157635	1	52.33333333	8/23/2008
3	Corn	8-Aug	2008	Aug	8	2	2008	B	2.5	4	235.3333333	0	0	171	16002	16002	0.010686164	1	52.33333333	8/23/2008
5	Field Crop	8-Aug	2008	Aug	8	2	2008	B	2.5	4	235.3333333	0	0	5523	125561	125561	0.043986588	1	52.33333333	8/23/2008
7	Grains	8-Aug	2008	Aug	8	2	2008	B	2.5	4	235.3333333	0	0	454	24758	24758	0.018337507	1	52.33333333	8/23/2008
11	Alfalfa	8-Aug	2008	Aug	8	2	2008	B	2.5	4	235.3333333	0	0	82	18271	18271	0.004487986	1	52.33333333	8/23/2008
12	Rice	8-Aug	2008	Aug	8	2	2008	B	2.5	4	235.3333333	0	0	3477	355273	355273	0.00978684	1	52.33333333	8/23/2008
13	Row Crop	8-Aug	2008	Aug	8	2	2008	B	2.5	4	235.3333333	0	0	96	9581	9581	0.010019831	1	52.33333333	8/23/2008
99	Suitable-unassigned	8-Aug	2008	Aug	8	2	2008	B	2.5	4	235.3333333	0	0	1318	62988	62988	0.020924621	1	52.33333333	8/23/2008
100	Vineyard/Orchard	8-Aug	2008	Aug	8	2	2008	B	2.5	4	235.3333333	0	0	6287	303376	303376	0.020723459	1	52.33333333	8/23/2008
0	Unsuitable	9-Aug	2009	Aug	8	2	2009	A	2	4	219.5	0	0	16950	152950	152950	0.11082053	1	37.5	8/8/2009
0	Unsuitable	9-Aug	2009	Aug	8	2	2009	B	2.5	4	237.3333333	0	0	18678	147068	152950	0.127002475	0.961542988	55.33333333	8/26/2009
1	Grass/Pasture	9-Aug	2009	Aug	8	2	2009	A	2	4	219.5	0	0	6	812	812	0.007389163	1	37.5	8/8/2009
1	Grass/Pasture	9-Aug	2009	Aug	8	2	2009	B	2.5	4	237.3333333	0	0	2	795	812	0.002515723	0.979064039	55.33333333	8/26/2009
3	Corn	9-Aug	2009	Aug	8	2	2009	A	2	4	219.5	0	0	161	16002	16002	0.010061242	1	37.5	8/8/2009
3	Corn	9-Aug	2009	Aug	8	2	2009	B	2.5	4	237.3333333	0	0	562	14739	16002	0.038130131	0.921072366	55.33333333	8/26/2009
5	Field Crop	9-Aug	2009	Aug	8	2	2009	A	2	4	219.5	0	0	3779	125561	125561	0.030096925	1	37.5	8/8/2009
5	Field Crop	9-Aug	2009	Aug	8	2	2009	B	2.5	4	237.3333333	0	0	5594	122108	125561	0.045811904	0.972499423	55.33333333	8/26/2009
7	Grains	9-Aug	2009	Aug	8	2	2009	A	2	4	219.5	0	0	700	24758	24758	0.028273689	1	37.5	8/8/2009
7	Grains	9-Aug	2009	Aug	8	2	2009	B	2.5	4	237.3333333	0	0	560	22513	24758	0.024874517	0.909322239	55.33333333	8/26/2009
11	Alfalfa	9-Aug	2009	Aug	8	2	2009	A	2	4	219.5	0	0	80	18271	18271	0.004378523	1	37.5	8/8/2009
11	Alfalfa	9-Aug	2009	Aug	8	2	2009	B	2.5	4	237.3333333	0	0	209	16496	18271	0.012669738	0.902851513	55.33333333	8/26/2009
12	Rice	9-Aug	2009	Aug	8	2	2009	A	2	4	219.5	0	0	1464	355273	355273	0.004120775	1	37.5	8/8/2009
12	Rice	9-Aug	2009	Aug	8	2	2009	B	2.5	4	237.3333333	0	0	1799	347589	355273	0.005175653	0.978371562	55.33333333	8/26/2009
13	Row Crop	9-Aug	2009	Aug	8	2	2009	A	2	4	219.5	0	0	143	9581	9581	0.014925373	1	37.5	8/8/2009
13	Row Crop	9-Aug	2009	Aug	8	2	2009	B	2.5	4	237.3333333	0	0	81	8563	9581	0.009459302	0.893748043	55.33333333	8/26/2009
99	Suitable-unassigned	9-Aug	2009	Aug	8	2	2009	A	2	4	219.5	0	0	1116	62988	62988	0.017717661	1	37.5	8/8/2009
99	Suitable-unassigned	9-Aug	2009	Aug	8	2	2009	B	2.5	4	237.3333333	0	0	1267	59902	62988	0.021151214	0.951006541	55.33333333	8/26/2009
100	Vineyard/Orchard	9-Aug	2009	Aug	8	2	2009	A	2	4	219.5	0	0	2862	303376	303376	0.009433838	1	37.5	8/8/2009
100	Vineyard/Orchard	9-Aug	2009	Aug	8	2	2009	B	2.5	4	237.3333333	0	0	3156	279872	303376	0.011276584	0.922525183	55.33333333	8/26/2009
0	Unsuitable	10-Aug	2010	Aug	8	2	2010	A	2	4	222.5	0	0	21063	152950	152950	0.13771167	1	40.5	8/11/2010
0	Unsuitable	10-Aug	2010	Aug	8	2	2010	B	2.5	4	235	0	0	18359	152950	152950	0.12003269	1	53	8/24/2010
1	Grass/Pasture	10-Aug	2010	Aug	8	2	2010	A	2	4	222.5	0	0	8	812	812	0.009852217	1	40.5	8/11/2010
1	Grass/Pasture	10-Aug	2010	Aug	8	2	2010	B	2.5	4	235	0	0	16	812	812	0.019704433	1	53	8/24/2010
3	Corn	10-Aug	2010	Aug	8	2	2010	A	2	4	222.5	0	0	516	16002	16002	0.032245969	1	40.5	8/11/2010
3	Corn	10-Aug	2010	Aug	8	2	2010	B	2.5	4	235	0	0	157	16002	16002	0.009811274	1	53	8/24/2010
5	Field Crop	10-Aug	2010	Aug	8	2	2010	A	2	4	222.5	0	0	6478	125561	125561	0.051592453	1	40.5	8/11/2010
5	Field Crop	10-Aug	2010	Aug	8	2	2010	B	2.5	4	235	0	0	3330	125561	125561	0.026520974	1	53	8/24/2010
7	Grains	10-Aug	2010	Aug	8	2	2010	A	2	4	222.5	0	0	646	24758	24758	0.026092576	1	40.5	8/11/2010
7	Grains	10-Aug	2010	Aug	8	2	2010	B	2.5	4	235	0	0	204	24758	24758	0.008239761	1	53	8/24/2010
11	Alfalfa	10-Aug	2010	Aug	8	2	2010	A	2	4	222.5	0	0	93	18271	18271	0.005090033	1	40.5	8/11/2010
11	Alfalfa	10-Aug	2010	Aug	8	2	2010	B	2.5	4	235	0	0	37	18271	18271	0.002025067	1	53	8/24/2010
12	Rice	10-Aug	2010	Aug	8	2	2010	A	2	4	222.5	0	0	2717	355273	355273	0.00764764	1	40.5	8/11/2010
12	Rice	10-Aug	2010	Aug	8	2	2010	B	2.5	4	235	0	0	979	355273	355273	0.002755627	1	53	8/24/2010
13	Row Crop	10-Aug	2010	Aug	8	2	2010	A	2	4	222.5	0	0	365	9581	9581	0.038096232	1	40.5	8/11/2010
13	Row Crop	10-Aug	2010	Aug	8	2	2010	B	2.5	4	235	0	0	22	9581	9581	0.002296211	1	53	8/24/2010
99	Suitable-unassigned	10-Aug	2010	Aug	8	2	2010	A	2	4	222.5	0	0	2970	62988	62988	0.047151838	1	40.5	8/11/2010
99	Suitable-unassigned	10-Aug	2010	Aug	8	2	2010	B	2.5	4	235	0	0	552	62988	62988	0.008763574	1	53	8/24/2010
100	Vineyard/Orchard	10-Aug	2010	Aug	8	2	2010	A	2	4	222.5	0	0	3903	303376	303376	0.012865223	1	40.5	8/11/2010
100	Vineyard/Orchard	10-Aug	2010	Aug	8	2	2010	B	2.5	4	235	0	0	2458	303376	303376	0.008102157	1	53	8/24/2010
0	Unsuitable	11-Aug	2011	Aug	8	2	2011	B	2.5	4	232.6666667	0	0	19670	152950	152950	0.128604119	1	50.66666667	8/21/2011
1	Grass/Pasture	11-Aug	2011	Aug	8	2	2011	B	2.5	4	232.6666667	0	0	3	812	812	0.003694581	1	50.66666667	8/21/2011
3	Corn	11-Aug	2011	Aug	8	2	2011	B	2.5	4	232.6666667	0	0	117	16002	16002	0.007311586	1	50.66666667	8/21/2011
5	Field Crop	11-Aug	2011	Aug	8	2	2011	B	2.5	4	232.6666667	0	0	4972	125561	125561	0.039598283	1	50.66666667	8/21/2011
7	Grains	11-Aug	2011	Aug	8	2	2011	B	2.5	4	232.6666667	0	0	264	24758	24758	0.01066322	1	50.66666667	8/21/2011
11	Alfalfa	11-Aug	2011	Aug	8	2	2011	B	2.5	4	232.6666667	0	0	155	18271	18271	0.008483389	1	50.66666667	8/21/2011
12	Rice	11-Aug	2011	Aug	8	2	2011	B	2.5	4	232.6666667	0	0	1416	355273	355273	0.003985667	1	50.66666667	8/21/2011
13	Row Crop	11-Aug	2011	Aug	8	2	2011	B	2.5	4	232.6666667	0	0	66	9581	9581	0.006888634	1	50.66666667	8/21/2011
99	Suitable-unassigned	11-Aug	2011	Aug	8	2	2011	B	2.5	4	232.6666667	0	0	988	62988	62988	0.015685527	1	50.66666667	8/21/2011
100	Vineyard/Orchard	11-Aug	2011	Aug	8	2	2011	B	2.5	4	232.6666667	0	0	4021	303376	303376	0.01325418	1	50.66666667	8/21/2011
0	Unsuitable	13-Aug	2013	Aug	8	2	2013	B	2.5	4	237.6666667	0	0	13766	133268	152950	0.103295615	0.871317424	55.66666667	8/26/2013
1	Grass/Pasture	13-Aug	2013	Aug	8	2	2013	B	2.5	4	237.6666667	0	0	3	753	812	0.003984064	0.927339901	55.66666667	8/26/2013
3	Corn	13-Aug	2013	Aug	8	2	2013	B	2.5	4	237.6666667	0	0	0	15896	16002	0	0.993375828	55.66666667	8/26/2013
5	Field Crop	13-Aug	2013	Aug	8	2	2013	B	2.5	4	237.6666667	0	0	1328	112605	125561	0.011793437	0.896815094	55.66666667	8/26/2013
7	Grains	13-Aug	2013	Aug	8	2	2013	B	2.5	4	237.6666667	0	0	29	22316	24758	0.001299516	0.901365215	55.66666667	8/26/2013
11	Alfalfa	13-Aug	2013	Aug	8	2	2013	B	2.5	4	237.6666667	0	0	9	16545	18271	0.000543971	0.905533359	55.66666667	8/26/2013
12	Rice	13-Aug	2013	Aug	8	2	2013	B	2.5	4	237.6666667	0	0	133	331351	355273	0.000401387	0.932665865	55.66666667	8/26/2013
13	Row Crop	13-Aug	2013	Aug	8	2	2013	B	2.5	4	237.6666667	0	0	8	9564	9581	0.00083647	0.998225655	55.66666667	8/26/2013
99	Suitable-unassigned	13-Aug	2013	Aug	8	2	2013	B	2.5	4	237.6666667	0	0	202	59010	62988	0.003423149	0.936845113	55.66666667	8/26/2013
100	Vineyard/Orchard	13-Aug	2013	Aug	8	2	2013	B	2.5	4	237.6666667	0	0	591	226874	303376	0.00260497	0.747831074	55.66666667	8/26/2013
0	Unsuitable	1-Sep	2001	Sep	9	3	2001	A	3	4	252.6666667	0	0	19692	152950	152950	0.128747957	1	70.66666667	9/10/2001
1	Grass/Pasture	1-Sep	2001	Sep	9	3	2001	A	3	4	252.6666667	0	0	11	812	812	0.013546798	1	70.66666667	9/10/2001
3	Corn	1-Sep	2001	Sep	9	3	2001	A	3	4	252.6666667	0	0	123	16002	16002	0.007686539	1	70.66666667	9/10/2001
5	Field Crop	1-Sep	2001	Sep	9	3	2001	A	3	4	252.6666667	0	0	4537	125561	125561	0.036133831	1	70.66666667	9/10/2001
7	Grains	1-Sep	2001	Sep	9	3	2001	A	3	4	252.6666667	0	0	558	24758	24758	0.022538169	1	70.66666667	9/10/2001
11	Alfalfa	1-Sep	2001	Sep	9	3	2001	A	3	4	252.6666667	0	0	280	18271	18271	0.015324832	1	70.66666667	9/10/2001
12	Rice	1-Sep	2001	Sep	9	3	2001	A	3	4	252.6666667	0	0	3517	355273	355273	0.009899429	1	70.66666667	9/10/2001
13	Row Crop	1-Sep	2001	Sep	9	3	2001	A	3	4	252.6666667	0	0	133	9581	9581	0.013881641	1	70.66666667	9/10/2001
99	Suitable-unassigned	1-Sep	2001	Sep	9	3	2001	A	3	4	252.6666667	0	0	1036	62988	62988	0.016447577	1	70.66666667	9/10/2001
100	Vineyard/Orchard	1-Sep	2001	Sep	9	3	2001	A	3	4	252.6666667	0	0	6013	303376	303376	0.019820289	1	70.66666667	9/10/2001
0	Unsuitable	2-Sep	2002	Sep	9	3	2002	A	3	4	250.3333333	0	0	19479	152950	152950	0.127355345	1	68.33333333	9/8/2002
0	Unsuitable	2-Sep	2002	Sep	9	3	2002	B	3.5	4	266.3333333	0	0	20898	152950	152950	0.136632887	1	84.33333333	9/24/2002
1	Grass/Pasture	2-Sep	2002	Sep	9	3	2002	A	3	4	250.3333333	0	0	7	812	812	0.00862069	1	68.33333333	9/8/2002
1	Grass/Pasture	2-Sep	2002	Sep	9	3	2002	B	3.5	4	266.3333333	0	0	7	812	812	0.00862069	1	84.33333333	9/24/2002
3	Corn	2-Sep	2002	Sep	9	3	2002	A	3	4	250.3333333	0	0	318	16002	16002	0.019872516	1	68.33333333	9/8/2002
3	Corn	2-Sep	2002	Sep	9	3	2002	B	3.5	4	266.3333333	0	0	386	16002	16002	0.024121985	1	84.33333333	9/24/2002
5	Field Crop	2-Sep	2002	Sep	9	3	2002	A	3	4	250.3333333	0	0	3676	125561	125561	0.029276607	1	68.33333333	9/8/2002
5	Field Crop	2-Sep	2002	Sep	9	3	2002	B	3.5	4	266.3333333	0	0	4856	125561	125561	0.038674429	1	84.33333333	9/24/2002
7	Grains	2-Sep	2002	Sep	9	3	2002	A	3	4	250.3333333	0	0	269	24758	24758	0.010865175	1	68.33333333	9/8/2002
7	Grains	2-Sep	2002	Sep	9	3	2002	B	3.5	4	266.3333333	0	0	403	24758	24758	0.016277567	1	84.33333333	9/24/2002
11	Alfalfa	2-Sep	2002	Sep	9	3	2002	A	3	4	250.3333333	0	0	278	18271	18271	0.015215369	1	68.33333333	9/8/2002
11	Alfalfa	2-Sep	2002	Sep	9	3	2002	B	3.5	4	266.3333333	0	0	355	18271	18271	0.019429697	1	84.33333333	9/24/2002
12	Rice	2-Sep	2002	Sep	9	3	2002	A	3	4	250.3333333	0	0	2371	355273	355273	0.006673741	1	68.33333333	9/8/2002
12	Rice	2-Sep	2002	Sep	9	3	2002	B	3.5	4	266.3333333	0	0	6422	355273	355273	0.01807624	1	84.33333333	9/24/2002
13	Row Crop	2-Sep	2002	Sep	9	3	2002	A	3	4	250.3333333	0	0	137	9581	9581	0.014299134	1	68.33333333	9/8/2002
13	Row Crop	2-Sep	2002	Sep	9	3	2002	B	3.5	4	266.3333333	0	0	111	9581	9581	0.011585429	1	84.33333333	9/24/2002
99	Suitable-unassigned	2-Sep	2002	Sep	9	3	2002	A	3	4	250.3333333	0	0	840	62988	62988	0.013335873	1	68.33333333	9/8/2002
99	Suitable-unassigned	2-Sep	2002	Sep	9	3	2002	B	3.5	4	266.3333333	0	0	1252	62988	62988	0.019876802	1	84.33333333	9/24/2002
100	Vineyard/Orchard	2-Sep	2002	Sep	9	3	2002	A	3	4	250.3333333	0	0	3968	303376	303376	0.013079479	1	68.33333333	9/8/2002
100	Vineyard/Orchard	2-Sep	2002	Sep	9	3	2002	B	3.5	4	266.3333333	0	0	7562	303376	303376	0.024926164	1	84.33333333	9/24/2002
0	Unsuitable	5-Sep	2005	Sep	9	3	2005	B	3.5	4	263.6666667	0	0	1357	3085	152950	0.43987034	0.02016999	81.66666667	9/21/2005
1	Grass/Pasture	5-Sep	2005	Sep	9	3	2005	B	3.5	4	263.6666667	0	0	0	4	812	0	0.004926108	81.66666667	9/21/2005
3	Corn	5-Sep	2005	Sep	9	3	2005	B	3.5	4	263.6666667	0	0	11	3214	16002	0.003422526	0.200849894	81.66666667	9/21/2005
5	Field Crop	5-Sep	2005	Sep	9	3	2005	B	3.5	4	263.6666667	0	0	143	4715	125561	0.030328738	0.037551469	81.66666667	9/21/2005
7	Grains	5-Sep	2005	Sep	9	3	2005	B	3.5	4	263.6666667	0	0	2	200	24758	0.01	0.008078197	81.66666667	9/21/2005
11	Alfalfa	5-Sep	2005	Sep	9	3	2005	B	3.5	4	263.6666667	0	0	0	50	18271	0	0.002736577	81.66666667	9/21/2005
12	Rice	5-Sep	2005	Sep	9	3	2005	B	3.5	4	263.6666667	0	0	9	2250	355273	0.004	0.006333158	81.66666667	9/21/2005
13	Row Crop	5-Sep	2005	Sep	9	3	2005	B	3.5	4	263.6666667	0	0	3	1158	9581	0.002590674	0.12086421	81.66666667	9/21/2005
99	Suitable-unassigned	5-Sep	2005	Sep	9	3	2005	B	3.5	4	263.6666667	0	0	20	3263	62988	0.006129329	0.051803518	81.66666667	9/21/2005
100	Vineyard/Orchard	5-Sep	2005	Sep	9	3	2005	B	3.5	4	263.6666667	0	0	38	1814	303376	0.020948181	0.005979379	81.66666667	9/21/2005
0	Unsuitable	6-Sep	2006	Sep	9	3	2006	A	3	4	250.6666667	0	0	20594	152950	152950	0.134645309	1	68.66666667	9/8/2006
0	Unsuitable	6-Sep	2006	Sep	9	3	2006	B	3.5	4	266.6666667	0	0	16960	111744	152950	0.151775487	0.730591697	84.66666667	9/24/2006
1	Grass/Pasture	6-Sep	2006	Sep	9	3	2006	A	3	4	250.6666667	0	0	2	812	812	0.002463054	1	68.66666667	9/8/2006
1	Grass/Pasture	6-Sep	2006	Sep	9	3	2006	B	3.5	4	266.6666667	0	0	1	696	812	0.001436782	0.857142857	84.66666667	9/24/2006
3	Corn	6-Sep	2006	Sep	9	3	2006	A	3	4	250.6666667	0	0	146	16002	16002	0.00912386	1	68.66666667	9/8/2006
3	Corn	6-Sep	2006	Sep	9	3	2006	B	3.5	4	266.6666667	0	0	1327	9324	16002	0.142320892	0.582677165	84.66666667	9/24/2006
5	Field Crop	6-Sep	2006	Sep	9	3	2006	A	3	4	250.6666667	0	0	4970	125561	125561	0.039582354	1	68.66666667	9/8/2006
5	Field Crop	6-Sep	2006	Sep	9	3	2006	B	3.5	4	266.6666667	0	0	8644	99409	125561	0.086953898	0.791718766	84.66666667	9/24/2006
7	Grains	6-Sep	2006	Sep	9	3	2006	A	3	4	250.6666667	0	0	156	24758	24758	0.006300994	1	68.66666667	9/8/2006
7	Grains	6-Sep	2006	Sep	9	3	2006	B	3.5	4	266.6666667	0	0	2641	19691	24758	0.134122188	0.79533888	84.66666667	9/24/2006
11	Alfalfa	6-Sep	2006	Sep	9	3	2006	A	3	4	250.6666667	0	0	65	18271	18271	0.00355755	1	68.66666667	9/8/2006
11	Alfalfa	6-Sep	2006	Sep	9	3	2006	B	3.5	4	266.6666667	0	0	339	15761	18271	0.021508788	0.86262383	84.66666667	9/24/2006
12	Rice	6-Sep	2006	Sep	9	3	2006	A	3	4	250.6666667	0	0	1850	355273	355273	0.005207263	1	68.66666667	9/8/2006
12	Rice	6-Sep	2006	Sep	9	3	2006	B	3.5	4	266.6666667	0	0	8785	325946	355273	0.026952317	0.917452213	84.66666667	9/24/2006
13	Row Crop	6-Sep	2006	Sep	9	3	2006	A	3	4	250.6666667	0	0	69	9581	9581	0.007201753	1	68.66666667	9/8/2006
13	Row Crop	6-Sep	2006	Sep	9	3	2006	B	3.5	4	266.6666667	0	0	906	7554	9581	0.119936458	0.788435445	84.66666667	9/24/2006
99	Suitable-unassigned	6-Sep	2006	Sep	9	3	2006	A	3	4	250.6666667	0	0	868	62988	62988	0.013780403	1	68.66666667	9/8/2006
99	Suitable-unassigned	6-Sep	2006	Sep	9	3	2006	B	3.5	4	266.6666667	0	0	5088	51988	62988	0.097868739	0.825363561	84.66666667	9/24/2006
100	Vineyard/Orchard	6-Sep	2006	Sep	9	3	2006	A	3	4	250.6666667	0	0	3330	303376	303376	0.010976478	1	68.66666667	9/8/2006
100	Vineyard/Orchard	6-Sep	2006	Sep	9	3	2006	B	3.5	4	266.6666667	0	0	6432	171421	303376	0.037521657	0.565044697	84.66666667	9/24/2006
0	Unsuitable	7-Sep	2007	Sep	9	3	2007	A	3	4	251	0	0	19609	152950	152950	0.128205296	1	69	9/9/2007
1	Grass/Pasture	7-Sep	2007	Sep	9	3	2007	A	3	4	251	0	0	5	812	812	0.006157635	1	69	9/9/2007
3	Corn	7-Sep	2007	Sep	9	3	2007	A	3	4	251	0	0	278	16002	16002	0.017372828	1	69	9/9/2007
5	Field Crop	7-Sep	2007	Sep	9	3	2007	A	3	4	251	0	0	4189	125561	125561	0.03336227	1	69	9/9/2007
7	Grains	7-Sep	2007	Sep	9	3	2007	A	3	4	251	0	0	194	24758	24758	0.007835851	1	69	9/9/2007
11	Alfalfa	7-Sep	2007	Sep	9	3	2007	A	3	4	251	0	0	288	18271	18271	0.015762684	1	69	9/9/2007
12	Rice	7-Sep	2007	Sep	9	3	2007	A	3	4	251	0	0	2042	355273	355273	0.005747693	1	69	9/9/2007
13	Row Crop	7-Sep	2007	Sep	9	3	2007	A	3	4	251	0	0	74	9581	9581	0.00772362	1	69	9/9/2007
99	Suitable-unassigned	7-Sep	2007	Sep	9	3	2007	A	3	4	251	0	0	1163	62988	62988	0.018463834	1	69	9/9/2007
100	Vineyard/Orchard	7-Sep	2007	Sep	9	3	2007	A	3	4	251	0	0	5088	303376	303376	0.016771267	1	69	9/9/2007
0	Unsuitable	8-Sep	2008	Sep	9	3	2008	A	3	4	251.3333333	0	0	21844	152950	152950	0.142817914	1	68.33333333	9/8/2008
1	Grass/Pasture	8-Sep	2008	Sep	9	3	2008	A	3	4	251.3333333	0	0	6	812	812	0.007389163	1	68.33333333	9/8/2008
3	Corn	8-Sep	2008	Sep	9	3	2008	A	3	4	251.3333333	0	0	148	16002	16002	0.009248844	1	68.33333333	9/8/2008
5	Field Crop	8-Sep	2008	Sep	9	3	2008	A	3	4	251.3333333	0	0	6496	125561	125561	0.05173581	1	68.33333333	9/8/2008
7	Grains	8-Sep	2008	Sep	9	3	2008	A	3	4	251.3333333	0	0	563	24758	24758	0.022740124	1	68.33333333	9/8/2008
11	Alfalfa	8-Sep	2008	Sep	9	3	2008	A	3	4	251.3333333	0	0	104	18271	18271	0.00569208	1	68.33333333	9/8/2008
12	Rice	8-Sep	2008	Sep	9	3	2008	A	3	4	251.3333333	0	0	5282	355273	355273	0.01486744	1	68.33333333	9/8/2008
13	Row Crop	8-Sep	2008	Sep	9	3	2008	A	3	4	251.3333333	0	0	455	9581	9581	0.047489824	1	68.33333333	9/8/2008
99	Suitable-unassigned	8-Sep	2008	Sep	9	3	2008	A	3	4	251.3333333	0	0	1486	62988	62988	0.023591795	1	68.33333333	9/8/2008
100	Vineyard/Orchard	8-Sep	2008	Sep	9	3	2008	A	3	4	251.3333333	0	0	8329	303376	303376	0.02745438	1	68.33333333	9/8/2008
0	Unsuitable	9-Sep	2009	Sep	9	3	2009	A	3	4	251.5	0	0	19640	152950	152950	0.128407976	1	69.5	9/9/2009
1	Grass/Pasture	9-Sep	2009	Sep	9	3	2009	A	3	4	251.5	0	0	5	812	812	0.006157635	1	69.5	9/9/2009
3	Corn	9-Sep	2009	Sep	9	3	2009	A	3	4	251.5	0	0	95	16002	16002	0.005936758	1	69.5	9/9/2009
5	Field Crop	9-Sep	2009	Sep	9	3	2009	A	3	4	251.5	0	0	5120	125561	125561	0.040776993	1	69.5	9/9/2009
7	Grains	9-Sep	2009	Sep	9	3	2009	A	3	4	251.5	0	0	1797	24758	24758	0.0725826	1	69.5	9/9/2009
11	Alfalfa	9-Sep	2009	Sep	9	3	2009	A	3	4	251.5	0	0	25	18271	18271	0.001368289	1	69.5	9/9/2009
12	Rice	9-Sep	2009	Sep	9	3	2009	A	3	4	251.5	0	0	3694	355273	355273	0.010397638	1	69.5	9/9/2009
13	Row Crop	9-Sep	2009	Sep	9	3	2009	A	3	4	251.5	0	0	167	9581	9581	0.017430331	1	69.5	9/9/2009
99	Suitable-unassigned	9-Sep	2009	Sep	9	3	2009	A	3	4	251.5	0	0	1570	62988	62988	0.024925383	1	69.5	9/9/2009
100	Vineyard/Orchard	9-Sep	2009	Sep	9	3	2009	A	3	4	251.5	0	0	4316	303376	303376	0.01422657	1	69.5	9/9/2009
0	Unsuitable	11-Sep	2011	Sep	9	3	2011	A	3	4	249.5	0	0	19340	152950	152950	0.126446551	1	67.5	9/7/2011
0	Unsuitable	11-Sep	2011	Sep	9	3	2011	B	3.5	4	264.6666667	0	0	18804	152950	152950	0.122942138	1	82.66666667	9/22/2011
1	Grass/Pasture	11-Sep	2011	Sep	9	3	2011	A	3	4	249.5	0	0	7	812	812	0.00862069	1	67.5	9/7/2011
1	Grass/Pasture	11-Sep	2011	Sep	9	3	2011	B	3.5	4	264.6666667	0	0	8	812	812	0.009852217	1	82.66666667	9/22/2011
3	Corn	11-Sep	2011	Sep	9	3	2011	A	3	4	249.5	0	0	78	16002	16002	0.004874391	1	67.5	9/7/2011
3	Corn	11-Sep	2011	Sep	9	3	2011	B	3.5	4	264.6666667	0	0	95	16002	16002	0.005936758	1	82.66666667	9/22/2011
5	Field Crop	11-Sep	2011	Sep	9	3	2011	A	3	4	249.5	0	0	5568	125561	125561	0.04434498	1	67.5	9/7/2011
5	Field Crop	11-Sep	2011	Sep	9	3	2011	B	3.5	4	264.6666667	0	0	4156	125561	125561	0.03309945	1	82.66666667	9/22/2011
7	Grains	11-Sep	2011	Sep	9	3	2011	A	3	4	249.5	0	0	555	24758	24758	0.022416997	1	67.5	9/7/2011
7	Grains	11-Sep	2011	Sep	9	3	2011	B	3.5	4	264.6666667	0	0	184	24758	24758	0.007431941	1	82.66666667	9/22/2011
11	Alfalfa	11-Sep	2011	Sep	9	3	2011	A	3	4	249.5	0	0	86	18271	18271	0.004706913	1	67.5	9/7/2011
11	Alfalfa	11-Sep	2011	Sep	9	3	2011	B	3.5	4	264.6666667	0	0	92	18271	18271	0.005035302	1	82.66666667	9/22/2011
12	Rice	11-Sep	2011	Sep	9	3	2011	A	3	4	249.5	0	0	1371	355273	355273	0.003859004	1	67.5	9/7/2011
12	Rice	11-Sep	2011	Sep	9	3	2011	B	3.5	4	264.6666667	0	0	1026	355273	355273	0.00288792	1	82.66666667	9/22/2011
13	Row Crop	11-Sep	2011	Sep	9	3	2011	A	3	4	249.5	0	0	141	9581	9581	0.014716627	1	67.5	9/7/2011
13	Row Crop	11-Sep	2011	Sep	9	3	2011	B	3.5	4	264.6666667	0	0	51	9581	9581	0.005323035	1	82.66666667	9/22/2011
99	Suitable-unassigned	11-Sep	2011	Sep	9	3	2011	A	3	4	249.5	0	0	979	62988	62988	0.015542643	1	67.5	9/7/2011
99	Suitable-unassigned	11-Sep	2011	Sep	9	3	2011	B	3.5	4	264.6666667	0	0	848	62988	62988	0.013462882	1	82.66666667	9/22/2011
100	Vineyard/Orchard	11-Sep	2011	Sep	9	3	2011	A	3	4	249.5	0	0	2289	303376	303376	0.007545093	1	67.5	9/7/2011
100	Vineyard/Orchard	11-Sep	2011	Sep	9	3	2011	B	3.5	4	264.6666667	0	0	3543	303376	303376	0.011678577	1	82.66666667	9/22/2011
0	Unsuitable	13-Sep	2013	Sep	9	3	2013	A	3	4	251	0	0	17135	152950	152950	0.112030075	1	69	9/9/2013
1	Grass/Pasture	13-Sep	2013	Sep	9	3	2013	A	3	4	251	0	0	3	812	812	0.003694581	1	69	9/9/2013
3	Corn	13-Sep	2013	Sep	9	3	2013	A	3	4	251	0	0	5	16002	16002	0.000312461	1	69	9/9/2013
5	Field Crop	13-Sep	2013	Sep	9	3	2013	A	3	4	251	0	0	1894	125561	125561	0.015084302	1	69	9/9/2013
7	Grains	13-Sep	2013	Sep	9	3	2013	A	3	4	251	0	0	24	24758	24758	0.000969384	1	69	9/9/2013
11	Alfalfa	13-Sep	2013	Sep	9	3	2013	A	3	4	251	0	0	22	18271	18271	0.001204094	1	69	9/9/2013
12	Rice	13-Sep	2013	Sep	9	3	2013	A	3	4	251	0	0	297	355273	355273	0.000835977	1	69	9/9/2013
13	Row Crop	13-Sep	2013	Sep	9	3	2013	A	3	4	251	0	0	2	9581	9581	0.000208746	1	69	9/9/2013
99	Suitable-unassigned	13-Sep	2013	Sep	9	3	2013	A	3	4	251	0	0	286	62988	62988	0.004540547	1	69	9/9/2013
100	Vineyard/Orchard	13-Sep	2013	Sep	9	3	2013	A	3	4	251	0	0	1085	303376	303376	0.00357642	1	69	9/9/2013
0	Unsuitable	1-Oct	2001	Oct	10	4	2001	B	4.5	4	295.3333333	0	0	15316	84875	152950	0.180453608	0.554919908	113.3333333	10/23/2001
1	Grass/Pasture	1-Oct	2001	Oct	10	4	2001	B	4.5	4	295.3333333	0	0	3	456	812	0.006578947	0.561576355	113.3333333	10/23/2001
3	Corn	1-Oct	2001	Oct	10	4	2001	B	4.5	4	295.3333333	0	0	895	15080	16002	0.059350133	0.942382202	113.3333333	10/23/2001
5	Field Crop	1-Oct	2001	Oct	10	4	2001	B	4.5	4	295.3333333	0	0	6458	82720	125561	0.0780706	0.658803291	113.3333333	10/23/2001
7	Grains	1-Oct	2001	Oct	10	4	2001	B	4.5	4	295.3333333	0	0	1660	17374	24758	0.095545067	0.701752969	113.3333333	10/23/2001
11	Alfalfa	1-Oct	2001	Oct	10	4	2001	B	4.5	4	295.3333333	0	0	705	14420	18271	0.04889043	0.789228833	113.3333333	10/23/2001
12	Rice	1-Oct	2001	Oct	10	4	2001	B	4.5	4	295.3333333	0	0	49579	274631	355273	0.180529511	0.773013992	113.3333333	10/23/2001
13	Row Crop	1-Oct	2001	Oct	10	4	2001	B	4.5	4	295.3333333	0	0	365	6890	9581	0.052975327	0.719131615	113.3333333	10/23/2001
99	Suitable-unassigned	1-Oct	2001	Oct	10	4	2001	B	4.5	4	295.3333333	0	0	2865	44307	62988	0.064662469	0.703419699	113.3333333	10/23/2001
100	Vineyard/Orchard	1-Oct	2001	Oct	10	4	2001	B	4.5	4	295.3333333	0	0	6790	177185	303376	0.038321528	0.584044222	113.3333333	10/23/2001
0	Unsuitable	2-Oct	2002	Oct	10	4	2002	A	4	4	282.3333333	0	0	27162	152950	152950	0.177587447	1	100.3333333	10/10/2002
0	Unsuitable	2-Oct	2002	Oct	10	4	2002	B	4.5	4	298.3333333	0	0	21280	152950	152950	0.139130435	1	116.3333333	10/26/2002
1	Grass/Pasture	2-Oct	2002	Oct	10	4	2002	A	4	4	282.3333333	0	0	10	812	812	0.012315271	1	100.3333333	10/10/2002
1	Grass/Pasture	2-Oct	2002	Oct	10	4	2002	B	4.5	4	298.3333333	0	0	5	812	812	0.006157635	1	116.3333333	10/26/2002
3	Corn	2-Oct	2002	Oct	10	4	2002	A	4	4	282.3333333	0	0	2073	16002	16002	0.129546307	1	100.3333333	10/10/2002
3	Corn	2-Oct	2002	Oct	10	4	2002	B	4.5	4	298.3333333	0	0	538	16002	16002	0.033620797	1	116.3333333	10/26/2002
5	Field Crop	2-Oct	2002	Oct	10	4	2002	A	4	4	282.3333333	0	0	14128	125561	125561	0.112519015	1	100.3333333	10/10/2002
5	Field Crop	2-Oct	2002	Oct	10	4	2002	B	4.5	4	298.3333333	0	0	8074	125561	125561	0.064303406	1	116.3333333	10/26/2002
7	Grains	2-Oct	2002	Oct	10	4	2002	A	4	4	282.3333333	0	0	2772	24758	24758	0.11196381	1	100.3333333	10/10/2002
7	Grains	2-Oct	2002	Oct	10	4	2002	B	4.5	4	298.3333333	0	0	731	24758	24758	0.02952581	1	116.3333333	10/26/2002
11	Alfalfa	2-Oct	2002	Oct	10	4	2002	A	4	4	282.3333333	0	0	2628	18271	18271	0.143834492	1	100.3333333	10/10/2002
11	Alfalfa	2-Oct	2002	Oct	10	4	2002	B	4.5	4	298.3333333	0	0	455	18271	18271	0.024902852	1	116.3333333	10/26/2002
12	Rice	2-Oct	2002	Oct	10	4	2002	A	4	4	282.3333333	0	0	50321	355273	355273	0.141640372	1	100.3333333	10/10/2002
12	Rice	2-Oct	2002	Oct	10	4	2002	B	4.5	4	298.3333333	0	0	42353	355273	355273	0.119212549	1	116.3333333	10/26/2002
13	Row Crop	2-Oct	2002	Oct	10	4	2002	A	4	4	282.3333333	0	0	1776	9581	9581	0.185366872	1	100.3333333	10/10/2002
13	Row Crop	2-Oct	2002	Oct	10	4	2002	B	4.5	4	298.3333333	0	0	152	9581	9581	0.015864732	1	116.3333333	10/26/2002
99	Suitable-unassigned	2-Oct	2002	Oct	10	4	2002	A	4	4	282.3333333	0	0	7363	62988	62988	0.116895282	1	100.3333333	10/10/2002
99	Suitable-unassigned	2-Oct	2002	Oct	10	4	2002	B	4.5	4	298.3333333	0	0	2817	62988	62988	0.044722804	1	116.3333333	10/26/2002
100	Vineyard/Orchard	2-Oct	2002	Oct	10	4	2002	A	4	4	282.3333333	0	0	17503	303376	303376	0.057694083	1	100.3333333	10/10/2002
100	Vineyard/Orchard	2-Oct	2002	Oct	10	4	2002	B	4.5	4	298.3333333	0	0	6507	303376	303376	0.021448631	1	116.3333333	10/26/2002
0	Unsuitable	13-Nov	2013	Nov	11	5	2013	A	5	4	310.5	0	0	22280	152950	152950	0.145668519	1	128.5	11/7/2013
1	Grass/Pasture	13-Nov	2013	Nov	11	5	2013	A	5	4	310.5	0	0	7	812	812	0.00862069	1	128.5	11/7/2013
3	Corn	13-Nov	2013	Nov	11	5	2013	A	5	4	310.5	0	0	21	16002	16002	0.001312336	1	128.5	11/7/2013
5	Field Crop	13-Nov	2013	Nov	11	5	2013	A	5	4	310.5	0	0	7183	125561	125561	0.057207254	1	128.5	11/7/2013
7	Grains	13-Nov	2013	Nov	11	5	2013	A	5	4	310.5	0	0	75	24758	24758	0.003029324	1	128.5	11/7/2013
11	Alfalfa	13-Nov	2013	Nov	11	5	2013	A	5	4	310.5	0	0	337	18271	18271	0.01844453	1	128.5	11/7/2013
12	Rice	13-Nov	2013	Nov	11	5	2013	A	5	4	310.5	0	0	131344	355273	355273	0.369698795	1	128.5	11/7/2013
13	Row Crop	13-Nov	2013	Nov	11	5	2013	A	5	4	310.5	0	0	15	9581	9581	0.001565599	1	128.5	11/7/2013
99	Suitable-unassigned	13-Nov	2013	Nov	11	5	2013	A	5	4	310.5	0	0	2724	62988	62988	0.043246333	1	128.5	11/7/2013
100	Vineyard/Orchard	13-Nov	2013	Nov	11	5	2013	A	5	4	310.5	0	0	2357	303376	303376	0.007769237	1	128.5	11/7/2013
0	Unsuitable	Aug-00	2000	Aug	8	2	2000	A	2	5	216	0	0	14	9001	298218	0.001555383	0.030182618	33	8/4/2000
1	Grass/Pasture	Aug-00	2000	Aug	8	2	2000	A	2	5	216	0	0	137	149615	548137	0.000915684	0.272951835	33	8/4/2000
5	Field Crop	Aug-00	2000	Aug	8	2	2000	A	2	5	216	0	0	1	1008	238654	0.000992063	0.004223688	33	8/4/2000
7	Grains	Aug-00	2000	Aug	8	2	2000	A	2	5	216	0	0	4	27799	121453	0.00014389	0.228886895	33	8/4/2000
11	Alfalfa	Aug-00	2000	Aug	8	2	2000	A	2	5	216	0	0	0	77	302899	0	0.00025421	33	8/4/2000
99	Suitable-unassigned	Aug-00	2000	Aug	8	2	2000	A	2	5	216	0	0	10	15632	178251	0.000639713	0.087696563	33	8/4/2000
100	Vineyard/Orchard	Aug-00	2000	Aug	8	2	2000	A	2	5	216	0	0	0	26	199219	0	0.00013051	33	8/4/2000
0	Unsuitable	14-Jan	2014	Jan	1	7	2013	A	7	5	14	0	0	33054	298139	298218	0.11086775	0.999735093	197	1/15/2014
1	Grass/Pasture	14-Jan	2014	Jan	1	7	2013	A	7	5	14	0	0	2899	547874	548137	0.005291363	0.999520193	197	1/15/2014
3	Corn	14-Jan	2014	Jan	1	7	2013	A	7	5	14	0	0	181	32904	32904	0.005500851	1	197	1/15/2014
5	Field Crop	14-Jan	2014	Jan	1	7	2013	A	7	5	14	0	0	38520	238654	238654	0.161405214	1	197	1/15/2014
7	Grains	14-Jan	2014	Jan	1	7	2013	A	7	5	14	0	0	445	121443	121453	0.00366427	0.999917664	197	1/15/2014
11	Alfalfa	14-Jan	2014	Jan	1	7	2013	A	7	5	14	0	0	977	302899	302899	0.003225498	1	197	1/15/2014
12	Rice	14-Jan	2014	Jan	1	7	2013	A	7	5	14	0	0	55448	100990	100990	0.54904446	1	197	1/15/2014
13	Row Crop	14-Jan	2014	Jan	1	7	2013	A	7	5	14	0	0	1246	73457	73457	0.016962304	1	197	1/15/2014
99	Suitable-unassigned	14-Jan	2014	Jan	1	7	2013	A	7	5	14	0	0	5105	178218	178251	0.028644694	0.999814868	197	1/15/2014
100	Vineyard/Orchard	14-Jan	2014	Jan	1	7	2013	A	7	5	14	0	0	889	199216	199219	0.004462493	0.999984941	197	1/15/2014
0	Unsuitable	1-Jun	2001	Jun	6	12	2000	A	12	5	156.6666667	0	0	24744	298139	298218	0.082994845	0.999735093	339.6666667	6/6/2001
0	Unsuitable	1-Jun	2001	Jun	6	12	2000	B	12.5	5	170	0	0	23969	297995	298218	0.080434235	0.999252225	353	6/20/2001
1	Grass/Pasture	1-Jun	2001	Jun	6	12	2000	A	12	5	156.6666667	0	0	21862	547874	548137	0.039903335	0.999520193	339.6666667	6/6/2001
1	Grass/Pasture	1-Jun	2001	Jun	6	12	2000	B	12.5	5	170	0	0	6784	547079	548137	0.012400403	0.998069826	353	6/20/2001
3	Corn	1-Jun	2001	Jun	6	12	2000	A	12	5	156.6666667	0	0	1608	32904	32904	0.048869438	1	339.6666667	6/6/2001
3	Corn	1-Jun	2001	Jun	6	12	2000	B	12.5	5	170	0	0	1931	32904	32904	0.058685874	1	353	6/20/2001
5	Field Crop	1-Jun	2001	Jun	6	12	2000	A	12	5	156.6666667	0	0	15200	238654	238654	0.063690531	1	339.6666667	6/6/2001
5	Field Crop	1-Jun	2001	Jun	6	12	2000	B	12.5	5	170	0	0	15557	238519	238654	0.065223316	0.999434328	353	6/20/2001
7	Grains	1-Jun	2001	Jun	6	12	2000	A	12	5	156.6666667	0	0	7464	121443	121453	0.061460932	0.999917664	339.6666667	6/6/2001
7	Grains	1-Jun	2001	Jun	6	12	2000	B	12.5	5	170	0	0	1793	121433	121453	0.014765344	0.999835327	353	6/20/2001
11	Alfalfa	1-Jun	2001	Jun	6	12	2000	A	12	5	156.6666667	0	0	6571	302899	302899	0.0216937	1	339.6666667	6/6/2001
11	Alfalfa	1-Jun	2001	Jun	6	12	2000	B	12.5	5	170	0	0	8722	302899	302899	0.028795077	1	353	6/20/2001
12	Rice	1-Jun	2001	Jun	6	12	2000	A	12	5	156.6666667	0	0	44703	100990	100990	0.442647787	1	339.6666667	6/6/2001
12	Rice	1-Jun	2001	Jun	6	12	2000	B	12.5	5	170	0	0	26651	100990	100990	0.263897416	1	353	6/20/2001
13	Row Crop	1-Jun	2001	Jun	6	12	2000	A	12	5	156.6666667	0	0	1162	73457	73457	0.015818778	1	339.6666667	6/6/2001
13	Row Crop	1-Jun	2001	Jun	6	12	2000	B	12.5	5	170	0	0	2085	73457	73457	0.028383953	1	353	6/20/2001
99	Suitable-unassigned	1-Jun	2001	Jun	6	12	2000	A	12	5	156.6666667	0	0	9812	178218	178251	0.055056167	0.999814868	339.6666667	6/6/2001
99	Suitable-unassigned	1-Jun	2001	Jun	6	12	2000	B	12.5	5	170	0	0	5156	177997	178251	0.02896678	0.998575043	353	6/20/2001
100	Vineyard/Orchard	1-Jun	2001	Jun	6	12	2000	A	12	5	156.6666667	0	0	3851	199216	199219	0.019330777	0.999984941	339.6666667	6/6/2001
100	Vineyard/Orchard	1-Jun	2001	Jun	6	12	2000	B	12.5	5	170	0	0	4980	199216	199219	0.024997992	0.999984941	353	6/20/2001
0	Unsuitable	2-Jun	2002	Jun	6	12	2001	B	12.5	5	175.6666667	0	0	24737	297958	298218	0.083021768	0.999128155	358.6666667	6/25/2002
1	Grass/Pasture	2-Jun	2002	Jun	6	12	2001	B	12.5	5	175.6666667	0	0	8383	544291	548137	0.015401688	0.992983506	358.6666667	6/25/2002
3	Corn	2-Jun	2002	Jun	6	12	2001	B	12.5	5	175.6666667	0	0	1369	32904	32904	0.041605884	1	358.6666667	6/25/2002
5	Field Crop	2-Jun	2002	Jun	6	12	2001	B	12.5	5	175.6666667	0	0	17024	238411	238654	0.071406101	0.99898179	358.6666667	6/25/2002
7	Grains	2-Jun	2002	Jun	6	12	2001	B	12.5	5	175.6666667	0	0	1909	121376	121453	0.015727986	0.99936601	358.6666667	6/25/2002
11	Alfalfa	2-Jun	2002	Jun	6	12	2001	B	12.5	5	175.6666667	0	0	7971	302899	302899	0.026315703	1	358.6666667	6/25/2002
12	Rice	2-Jun	2002	Jun	6	12	2001	B	12.5	5	175.6666667	0	0	20604	100990	100990	0.2040202	1	358.6666667	6/25/2002
13	Row Crop	2-Jun	2002	Jun	6	12	2001	B	12.5	5	175.6666667	0	0	1821	73457	73457	0.024790013	1	358.6666667	6/25/2002
99	Suitable-unassigned	2-Jun	2002	Jun	6	12	2001	B	12.5	5	175.6666667	0	0	5040	177554	178251	0.028385731	0.996089784	358.6666667	6/25/2002
100	Vineyard/Orchard	2-Jun	2002	Jun	6	12	2001	B	12.5	5	175.6666667	0	0	2698	199216	199219	0.013543089	0.999984941	358.6666667	6/25/2002
0	Unsuitable	4-Jun	2004	Jun	6	12	2003	B	12.5	5	176.3333333	0	0	24004	297955	298218	0.080562501	0.999118095	359.3333333	6/25/2004
1	Grass/Pasture	4-Jun	2004	Jun	6	12	2003	B	12.5	5	176.3333333	0	0	6355	544021	548137	0.011681534	0.992490928	359.3333333	6/25/2004
3	Corn	4-Jun	2004	Jun	6	12	2003	B	12.5	5	176.3333333	0	0	1033	32904	32904	0.031394359	1	359.3333333	6/25/2004
5	Field Crop	4-Jun	2004	Jun	6	12	2003	B	12.5	5	176.3333333	0	0	14542	238409	238654	0.060996019	0.998973409	359.3333333	6/25/2004
7	Grains	4-Jun	2004	Jun	6	12	2003	B	12.5	5	176.3333333	0	0	1904	121365	121453	0.015688213	0.99927544	359.3333333	6/25/2004
11	Alfalfa	4-Jun	2004	Jun	6	12	2003	B	12.5	5	176.3333333	0	0	2920	302899	302899	0.009640177	1	359.3333333	6/25/2004
12	Rice	4-Jun	2004	Jun	6	12	2003	B	12.5	5	176.3333333	0	0	11846	100990	100990	0.117298742	1	359.3333333	6/25/2004
13	Row Crop	4-Jun	2004	Jun	6	12	2003	B	12.5	5	176.3333333	0	0	949	73457	73457	0.012919123	1	359.3333333	6/25/2004
99	Suitable-unassigned	4-Jun	2004	Jun	6	12	2003	B	12.5	5	176.3333333	0	0	5752	177508	178251	0.032404173	0.99583172	359.3333333	6/25/2004
100	Vineyard/Orchard	4-Jun	2004	Jun	6	12	2003	B	12.5	5	176.3333333	0	0	2133	199216	199219	0.010706971	0.999984941	359.3333333	6/25/2004
0	Unsuitable	6-Jun	2006	Jun	6	12	2005	B	12.5	5	170.6666667	0	0	27482	298139	298218	0.092178481	0.999735093	353.6666667	6/20/2006
1	Grass/Pasture	6-Jun	2006	Jun	6	12	2005	B	12.5	5	170.6666667	0	0	7398	547874	548137	0.013503105	0.999520193	353.6666667	6/20/2006
3	Corn	6-Jun	2006	Jun	6	12	2005	B	12.5	5	170.6666667	0	0	1794	32904	32904	0.054522247	1	353.6666667	6/20/2006
5	Field Crop	6-Jun	2006	Jun	6	12	2005	B	12.5	5	170.6666667	0	0	16749	238654	238654	0.070181099	1	353.6666667	6/20/2006
7	Grains	6-Jun	2006	Jun	6	12	2005	B	12.5	5	170.6666667	0	0	4598	121443	121453	0.037861384	0.999917664	353.6666667	6/20/2006
11	Alfalfa	6-Jun	2006	Jun	6	12	2005	B	12.5	5	170.6666667	0	0	8851	302899	302899	0.029220961	1	353.6666667	6/20/2006
12	Rice	6-Jun	2006	Jun	6	12	2005	B	12.5	5	170.6666667	0	0	56672	100990	100990	0.561164472	1	353.6666667	6/20/2006
13	Row Crop	6-Jun	2006	Jun	6	12	2005	B	12.5	5	170.6666667	0	0	2592	73457	73457	0.03528595	1	353.6666667	6/20/2006
99	Suitable-unassigned	6-Jun	2006	Jun	6	12	2005	B	12.5	5	170.6666667	0	0	7719	178218	178251	0.043312123	0.999814868	353.6666667	6/20/2006
100	Vineyard/Orchard	6-Jun	2006	Jun	6	12	2005	B	12.5	5	170.6666667	0	0	3469	199216	199219	0.01741326	0.999984941	353.6666667	6/20/2006
0	Unsuitable	7-Jun	2007	Jun	6	12	2006	B	12.5	5	173.6666667	0	0	133	9361	298218	0.014207884	0.031389789	356.6666667	6/23/2007
1	Grass/Pasture	7-Jun	2007	Jun	6	12	2006	B	12.5	5	173.6666667	0	0	2721	168300	548137	0.016167558	0.307040028	356.6666667	6/23/2007
5	Field Crop	7-Jun	2007	Jun	6	12	2006	B	12.5	5	173.6666667	0	0	243	1034	238654	0.235009671	0.004332632	356.6666667	6/23/2007
7	Grains	7-Jun	2007	Jun	6	12	2006	B	12.5	5	173.6666667	0	0	3067	27793	121453	0.110351527	0.228837493	356.6666667	6/23/2007
11	Alfalfa	7-Jun	2007	Jun	6	12	2006	B	12.5	5	173.6666667	0	0	0	77	302899	0	0.00025421	356.6666667	6/23/2007
99	Suitable-unassigned	7-Jun	2007	Jun	6	12	2006	B	12.5	5	173.6666667	0	0	1910	15733	178251	0.121400877	0.088263179	356.6666667	6/23/2007
100	Vineyard/Orchard	7-Jun	2007	Jun	6	12	2006	B	12.5	5	173.6666667	0	0	0	26	199219	0	0.00013051	356.6666667	6/23/2007
0	Unsuitable	10-Jun	2010	Jun	6	12	2009	B	12.5	5	176.3333333	0	0	25296	298139	298218	0.08484633	0.999735093	359.3333333	6/26/2010
1	Grass/Pasture	10-Jun	2010	Jun	6	12	2009	B	12.5	5	176.3333333	0	0	4191	547874	548137	0.007649569	0.999520193	359.3333333	6/26/2010
3	Corn	10-Jun	2010	Jun	6	12	2009	B	12.5	5	176.3333333	0	0	1569	32904	32904	0.047684172	1	359.3333333	6/26/2010
5	Field Crop	10-Jun	2010	Jun	6	12	2009	B	12.5	5	176.3333333	0	0	13269	238654	238654	0.05559932	1	359.3333333	6/26/2010
7	Grains	10-Jun	2010	Jun	6	12	2009	B	12.5	5	176.3333333	0	0	890	121443	121453	0.007328541	0.999917664	359.3333333	6/26/2010
11	Alfalfa	10-Jun	2010	Jun	6	12	2009	B	12.5	5	176.3333333	0	0	3145	302899	302899	0.010382999	1	359.3333333	6/26/2010
12	Rice	10-Jun	2010	Jun	6	12	2009	B	12.5	5	176.3333333	0	0	60550	100990	100990	0.599564313	1	359.3333333	6/26/2010
13	Row Crop	10-Jun	2010	Jun	6	12	2009	B	12.5	5	176.3333333	0	0	1028	73457	73457	0.013994582	1	359.3333333	6/26/2010
99	Suitable-unassigned	10-Jun	2010	Jun	6	12	2009	B	12.5	5	176.3333333	0	0	6265	178218	178251	0.035153576	0.999814868	359.3333333	6/26/2010
100	Vineyard/Orchard	10-Jun	2010	Jun	6	12	2009	B	12.5	5	176.3333333	0	0	2381	199216	199219	0.011951851	0.999984941	359.3333333	6/26/2010
0	Unsuitable	2-Jul	2002	Jul	7	1	2002	A	1	5	189	0	0	33300	294232	298218	0.113175997	0.986633939	7	7/9/2002
0	Unsuitable	2-Jul	2002	Jul	7	1	2002	B	1.5	5	202.3333333	0	0	33303	294203	298218	0.11319735	0.986536695	20.33333333	7/22/2002
1	Grass/Pasture	2-Jul	2002	Jul	7	1	2002	A	1	5	189	0	0	6396	515131	548137	0.012416259	0.939785127	7	7/9/2002
1	Grass/Pasture	2-Jul	2002	Jul	7	1	2002	B	1.5	5	202.3333333	0	0	6163	514863	548137	0.011970175	0.939296198	20.33333333	7/22/2002
3	Corn	2-Jul	2002	Jul	7	1	2002	A	1	5	189	0	0	2609	32872	32904	0.079368459	0.999027474	7	7/9/2002
3	Corn	2-Jul	2002	Jul	7	1	2002	B	1.5	5	202.3333333	0	0	2609	32872	32904	0.079368459	0.999027474	20.33333333	7/22/2002
5	Field Crop	2-Jul	2002	Jul	7	1	2002	A	1	5	189	0	0	39545	236358	238654	0.167309759	0.990379378	7	7/9/2002
5	Field Crop	2-Jul	2002	Jul	7	1	2002	B	1.5	5	202.3333333	0	0	39544	236358	238654	0.167305528	0.990379378	20.33333333	7/22/2002
7	Grains	2-Jul	2002	Jul	7	1	2002	A	1	5	189	0	0	7940	118761	121453	0.066856965	0.977835047	7	7/9/2002
7	Grains	2-Jul	2002	Jul	7	1	2002	B	1.5	5	202.3333333	0	0	8383	118654	121453	0.0706508	0.976954048	20.33333333	7/22/2002
11	Alfalfa	2-Jul	2002	Jul	7	1	2002	A	1	5	189	0	0	17464	298950	302899	0.058417796	0.986962651	7	7/9/2002
11	Alfalfa	2-Jul	2002	Jul	7	1	2002	B	1.5	5	202.3333333	0	0	17464	298883	302899	0.058430891	0.986741455	20.33333333	7/22/2002
12	Rice	2-Jul	2002	Jul	7	1	2002	A	1	5	189	0	0	15629	100990	100990	0.154757897	1	7	7/9/2002
12	Rice	2-Jul	2002	Jul	7	1	2002	B	1.5	5	202.3333333	0	0	15629	100990	100990	0.154757897	1	20.33333333	7/22/2002
13	Row Crop	2-Jul	2002	Jul	7	1	2002	A	1	5	189	0	0	12260	72687	73457	0.1686684	0.989517677	7	7/9/2002
13	Row Crop	2-Jul	2002	Jul	7	1	2002	B	1.5	5	202.3333333	0	0	12260	72687	73457	0.1686684	0.989517677	20.33333333	7/22/2002
99	Suitable-unassigned	2-Jul	2002	Jul	7	1	2002	A	1	5	189	0	0	18223	172360	178251	0.105726387	0.966951097	7	7/9/2002
99	Suitable-unassigned	2-Jul	2002	Jul	7	1	2002	B	1.5	5	202.3333333	0	0	18186	172296	178251	0.105550912	0.966592053	20.33333333	7/22/2002
100	Vineyard/Orchard	2-Jul	2002	Jul	7	1	2002	A	1	5	189	0	0	11822	198212	199219	0.05964321	0.994945261	7	7/9/2002
100	Vineyard/Orchard	2-Jul	2002	Jul	7	1	2002	B	1.5	5	202.3333333	0	0	11824	198212	199219	0.059653301	0.994945261	20.33333333	7/22/2002
0	Unsuitable	3-Jul	2003	Jul	7	1	2003	A	1	5	189.3333333	0	0	25062	298218	298218	0.084039193	1	7.333333333	7/9/2003
0	Unsuitable	3-Jul	2003	Jul	7	1	2003	B	1.5	5	205.3333333	0	0	104	9001	298218	0.011554272	0.030182618	23.33333333	7/25/2003
1	Grass/Pasture	3-Jul	2003	Jul	7	1	2003	A	1	5	189.3333333	0	0	7248	548137	548137	0.013222972	1	7.333333333	7/9/2003
1	Grass/Pasture	3-Jul	2003	Jul	7	1	2003	B	1.5	5	205.3333333	0	0	1515	149615	548137	0.01012599	0.272951835	23.33333333	7/25/2003
3	Corn	3-Jul	2003	Jul	7	1	2003	A	1	5	189.3333333	0	0	535	32904	32904	0.016259421	1	7.333333333	7/9/2003
5	Field Crop	3-Jul	2003	Jul	7	1	2003	A	1	5	189.3333333	0	0	12891	238654	238654	0.054015437	1	7.333333333	7/9/2003
5	Field Crop	3-Jul	2003	Jul	7	1	2003	B	1.5	5	205.3333333	0	0	65	1008	238654	0.064484127	0.004223688	23.33333333	7/25/2003
7	Grains	3-Jul	2003	Jul	7	1	2003	A	1	5	189.3333333	0	0	3719	121453	121453	0.030620899	1	7.333333333	7/9/2003
7	Grains	3-Jul	2003	Jul	7	1	2003	B	1.5	5	205.3333333	0	0	707	27799	121453	0.02543257	0.228886895	23.33333333	7/25/2003
11	Alfalfa	3-Jul	2003	Jul	7	1	2003	A	1	5	189.3333333	0	0	5896	302899	302899	0.019465234	1	7.333333333	7/9/2003
11	Alfalfa	3-Jul	2003	Jul	7	1	2003	B	1.5	5	205.3333333	0	0	0	77	302899	0	0.00025421	23.33333333	7/25/2003
12	Rice	3-Jul	2003	Jul	7	1	2003	A	1	5	189.3333333	0	0	10045	100990	100990	0.099465294	1	7.333333333	7/9/2003
13	Row Crop	3-Jul	2003	Jul	7	1	2003	A	1	5	189.3333333	0	0	659	73457	73457	0.008971235	1	7.333333333	7/9/2003
99	Suitable-unassigned	3-Jul	2003	Jul	7	1	2003	A	1	5	189.3333333	0	0	5242	178251	178251	0.02940797	1	7.333333333	7/9/2003
99	Suitable-unassigned	3-Jul	2003	Jul	7	1	2003	B	1.5	5	205.3333333	0	0	808	15632	178251	0.051688843	0.087696563	23.33333333	7/25/2003
100	Vineyard/Orchard	3-Jul	2003	Jul	7	1	2003	A	1	5	189.3333333	0	0	3038	199219	199219	0.015249549	1	7.333333333	7/9/2003
100	Vineyard/Orchard	3-Jul	2003	Jul	7	1	2003	B	1.5	5	205.3333333	0	0	0	26	199219	0	0.00013051	23.33333333	7/25/2003
0	Unsuitable	4-Jul	2004	Jul	7	1	2004	A	1	5	192.3333333	0	0	25554	298218	298218	0.085688993	1	9.333333333	7/11/2004
0	Unsuitable	4-Jul	2004	Jul	7	1	2004	B	1.5	5	208.3333333	0	0	2	559	298218	0.003577818	0.001874468	25.33333333	7/27/2004
1	Grass/Pasture	4-Jul	2004	Jul	7	1	2004	A	1	5	192.3333333	0	0	8347	548137	548137	0.015227945	1	9.333333333	7/11/2004
1	Grass/Pasture	4-Jul	2004	Jul	7	1	2004	B	1.5	5	208.3333333	0	0	12	12573	548137	0.000954426	0.022937696	25.33333333	7/27/2004
3	Corn	4-Jul	2004	Jul	7	1	2004	A	1	5	192.3333333	0	0	865	32904	32904	0.026288597	1	9.333333333	7/11/2004
5	Field Crop	4-Jul	2004	Jul	7	1	2004	A	1	5	192.3333333	0	0	13363	238654	238654	0.055993195	1	9.333333333	7/11/2004
5	Field Crop	4-Jul	2004	Jul	7	1	2004	B	1.5	5	208.3333333	0	0	0	12	238654	0	5.03E-05	25.33333333	7/27/2004
7	Grains	4-Jul	2004	Jul	7	1	2004	A	1	5	192.3333333	0	0	2825	121453	121453	0.023260027	1	9.333333333	7/11/2004
7	Grains	4-Jul	2004	Jul	7	1	2004	B	1.5	5	208.3333333	0	0	0	2	121453	0	1.65E-05	25.33333333	7/27/2004
11	Alfalfa	4-Jul	2004	Jul	7	1	2004	A	1	5	192.3333333	0	0	5066	302899	302899	0.016725047	1	9.333333333	7/11/2004
12	Rice	4-Jul	2004	Jul	7	1	2004	A	1	5	192.3333333	0	0	5834	100990	100990	0.057768096	1	9.333333333	7/11/2004
13	Row Crop	4-Jul	2004	Jul	7	1	2004	A	1	5	192.3333333	0	0	893	73457	73457	0.012156772	1	9.333333333	7/11/2004
99	Suitable-unassigned	4-Jul	2004	Jul	7	1	2004	A	1	5	192.3333333	0	0	5886	178251	178251	0.033020853	1	9.333333333	7/11/2004
99	Suitable-unassigned	4-Jul	2004	Jul	7	1	2004	B	1.5	5	208.3333333	0	0	0	10	178251	0	5.61E-05	25.33333333	7/27/2004
100	Vineyard/Orchard	4-Jul	2004	Jul	7	1	2004	A	1	5	192.3333333	0	0	2655	199219	199219	0.013327042	1	9.333333333	7/11/2004
0	Unsuitable	5-Jul	2005	Jul	7	1	2005	B	1.5	5	205	0	0	23195	298218	298218	0.077778672	1	23	7/25/2005
1	Grass/Pasture	5-Jul	2005	Jul	7	1	2005	B	1.5	5	205	0	0	3367	548137	548137	0.006142625	1	23	7/25/2005
3	Corn	5-Jul	2005	Jul	7	1	2005	B	1.5	5	205	0	0	488	32904	32904	0.014831024	1	23	7/25/2005
5	Field Crop	5-Jul	2005	Jul	7	1	2005	B	1.5	5	205	0	0	7496	238654	238654	0.031409488	1	23	7/25/2005
7	Grains	5-Jul	2005	Jul	7	1	2005	B	1.5	5	205	0	0	1676	121453	121453	0.013799577	1	23	7/25/2005
11	Alfalfa	5-Jul	2005	Jul	7	1	2005	B	1.5	5	205	0	0	1961	302899	302899	0.006474105	1	23	7/25/2005
12	Rice	5-Jul	2005	Jul	7	1	2005	B	1.5	5	205	0	0	3632	100990	100990	0.035963957	1	23	7/25/2005
13	Row Crop	5-Jul	2005	Jul	7	1	2005	B	1.5	5	205	0	0	527	73457	73457	0.007174265	1	23	7/25/2005
99	Suitable-unassigned	5-Jul	2005	Jul	7	1	2005	B	1.5	5	205	0	0	2140	178251	178251	0.012005543	1	23	7/25/2005
100	Vineyard/Orchard	5-Jul	2005	Jul	7	1	2005	B	1.5	5	205	0	0	1616	199219	199219	0.008111676	1	23	7/25/2005
0	Unsuitable	6-Jul	2006	Jul	7	1	2006	B	1.5	5	202.6666667	0	0	25049	298218	298218	0.083995601	1	20.66666667	7/22/2006
1	Grass/Pasture	6-Jul	2006	Jul	7	1	2006	B	1.5	5	202.6666667	0	0	3268	548137	548137	0.005962013	1	20.66666667	7/22/2006
3	Corn	6-Jul	2006	Jul	7	1	2006	B	1.5	5	202.6666667	0	0	607	32904	32904	0.018447605	1	20.66666667	7/22/2006
5	Field Crop	6-Jul	2006	Jul	7	1	2006	B	1.5	5	202.6666667	0	0	9655	238654	238654	0.040456058	1	20.66666667	7/22/2006
7	Grains	6-Jul	2006	Jul	7	1	2006	B	1.5	5	202.6666667	0	0	746	121453	121453	0.006142294	1	20.66666667	7/22/2006
11	Alfalfa	6-Jul	2006	Jul	7	1	2006	B	1.5	5	202.6666667	0	0	2057	302899	302899	0.006791043	1	20.66666667	7/22/2006
12	Rice	6-Jul	2006	Jul	7	1	2006	B	1.5	5	202.6666667	0	0	10069	100990	100990	0.099702941	1	20.66666667	7/22/2006
13	Row Crop	6-Jul	2006	Jul	7	1	2006	B	1.5	5	202.6666667	0	0	528	73457	73457	0.007187879	1	20.66666667	7/22/2006
99	Suitable-unassigned	6-Jul	2006	Jul	7	1	2006	B	1.5	5	202.6666667	0	0	3010	178251	178251	0.016886301	1	20.66666667	7/22/2006
100	Vineyard/Orchard	6-Jul	2006	Jul	7	1	2006	B	1.5	5	202.6666667	0	0	3135	199219	199219	0.015736451	1	20.66666667	7/22/2006
0	Unsuitable	7-Jul	2007	Jul	7	1	2007	A	1	5	189.6666667	0	0	26295	298218	298218	0.088173752	1	7.666666667	7/9/2007
0	Unsuitable	7-Jul	2007	Jul	7	1	2007	B	1.5	5	205.6666667	0	0	24435	298218	298218	0.081936704	1	23.66666667	7/25/2007
1	Grass/Pasture	7-Jul	2007	Jul	7	1	2007	A	1	5	189.6666667	0	0	4556	548137	548137	0.008311791	1	7.666666667	7/9/2007
1	Grass/Pasture	7-Jul	2007	Jul	7	1	2007	B	1.5	5	205.6666667	0	0	4514	548137	548137	0.008235167	1	23.66666667	7/25/2007
3	Corn	7-Jul	2007	Jul	7	1	2007	A	1	5	189.6666667	0	0	491	32904	32904	0.014922198	1	7.666666667	7/9/2007
3	Corn	7-Jul	2007	Jul	7	1	2007	B	1.5	5	205.6666667	0	0	231	32904	32904	0.007020423	1	23.66666667	7/25/2007
5	Field Crop	7-Jul	2007	Jul	7	1	2007	A	1	5	189.6666667	0	0	11961	238654	238654	0.050118582	1	7.666666667	7/9/2007
5	Field Crop	7-Jul	2007	Jul	7	1	2007	B	1.5	5	205.6666667	0	0	8550	238654	238654	0.035825924	1	23.66666667	7/25/2007
7	Grains	7-Jul	2007	Jul	7	1	2007	A	1	5	189.6666667	0	0	2491	121453	121453	0.020509992	1	7.666666667	7/9/2007
7	Grains	7-Jul	2007	Jul	7	1	2007	B	1.5	5	205.6666667	0	0	2248	121453	121453	0.018509218	1	23.66666667	7/25/2007
11	Alfalfa	7-Jul	2007	Jul	7	1	2007	A	1	5	189.6666667	0	0	3853	302899	302899	0.012720412	1	7.666666667	7/9/2007
11	Alfalfa	7-Jul	2007	Jul	7	1	2007	B	1.5	5	205.6666667	0	0	2446	302899	302899	0.008075299	1	23.66666667	7/25/2007
12	Rice	7-Jul	2007	Jul	7	1	2007	A	1	5	189.6666667	0	0	12138	100990	100990	0.120190118	1	7.666666667	7/9/2007
12	Rice	7-Jul	2007	Jul	7	1	2007	B	1.5	5	205.6666667	0	0	2547	100990	100990	0.025220319	1	23.66666667	7/25/2007
13	Row Crop	7-Jul	2007	Jul	7	1	2007	A	1	5	189.6666667	0	0	1799	73457	73457	0.024490518	1	7.666666667	7/9/2007
13	Row Crop	7-Jul	2007	Jul	7	1	2007	B	1.5	5	205.6666667	0	0	390	73457	73457	0.005309229	1	23.66666667	7/25/2007
99	Suitable-unassigned	7-Jul	2007	Jul	7	1	2007	A	1	5	189.6666667	0	0	5268	178251	178251	0.029553831	1	7.666666667	7/9/2007
99	Suitable-unassigned	7-Jul	2007	Jul	7	1	2007	B	1.5	5	205.6666667	0	0	2716	178251	178251	0.015236941	1	23.66666667	7/25/2007
100	Vineyard/Orchard	7-Jul	2007	Jul	7	1	2007	A	1	5	189.6666667	0	0	3955	199219	199219	0.019852524	1	7.666666667	7/9/2007
100	Vineyard/Orchard	7-Jul	2007	Jul	7	1	2007	B	1.5	5	205.6666667	0	0	1611	199219	199219	0.008086578	1	23.66666667	7/25/2007
0	Unsuitable	8-Jul	2008	Jul	7	1	2008	A	1	5	190	0	0	29822	298218	298218	0.100000671	1	7	7/9/2008
0	Unsuitable	8-Jul	2008	Jul	7	1	2008	B	1.5	5	203.3333333	0	0	26743	298218	298218	0.089676009	1	20.33333333	7/22/2008
1	Grass/Pasture	8-Jul	2008	Jul	7	1	2008	A	1	5	190	0	0	5765	548137	548137	0.010517444	1	7	7/9/2008
1	Grass/Pasture	8-Jul	2008	Jul	7	1	2008	B	1.5	5	203.3333333	0	0	1865	548137	548137	0.003402434	1	20.33333333	7/22/2008
3	Corn	8-Jul	2008	Jul	7	1	2008	A	1	5	190	0	0	1303	32904	32904	0.039600049	1	7	7/9/2008
3	Corn	8-Jul	2008	Jul	7	1	2008	B	1.5	5	203.3333333	0	0	594	32904	32904	0.018052516	1	20.33333333	7/22/2008
5	Field Crop	8-Jul	2008	Jul	7	1	2008	A	1	5	190	0	0	16447	238654	238654	0.068915669	1	7	7/9/2008
5	Field Crop	8-Jul	2008	Jul	7	1	2008	B	1.5	5	203.3333333	0	0	8799	238654	238654	0.036869275	1	20.33333333	7/22/2008
7	Grains	8-Jul	2008	Jul	7	1	2008	A	1	5	190	0	0	3132	121453	121453	0.025787753	1	7	7/9/2008
7	Grains	8-Jul	2008	Jul	7	1	2008	B	1.5	5	203.3333333	0	0	1881	121453	121453	0.015487473	1	20.33333333	7/22/2008
11	Alfalfa	8-Jul	2008	Jul	7	1	2008	A	1	5	190	0	0	5470	302899	302899	0.018058825	1	7	7/9/2008
11	Alfalfa	8-Jul	2008	Jul	7	1	2008	B	1.5	5	203.3333333	0	0	2659	302899	302899	0.008778504	1	20.33333333	7/22/2008
12	Rice	8-Jul	2008	Jul	7	1	2008	A	1	5	190	0	0	11580	100990	100990	0.114664818	1	7	7/9/2008
12	Rice	8-Jul	2008	Jul	7	1	2008	B	1.5	5	203.3333333	0	0	2535	100990	100990	0.025101495	1	20.33333333	7/22/2008
13	Row Crop	8-Jul	2008	Jul	7	1	2008	A	1	5	190	0	0	1377	73457	73457	0.018745661	1	7	7/9/2008
13	Row Crop	8-Jul	2008	Jul	7	1	2008	B	1.5	5	203.3333333	0	0	957	73457	73457	0.01302803	1	20.33333333	7/22/2008
99	Suitable-unassigned	8-Jul	2008	Jul	7	1	2008	A	1	5	190	0	0	5692	178251	178251	0.0319325	1	7	7/9/2008
99	Suitable-unassigned	8-Jul	2008	Jul	7	1	2008	B	1.5	5	203.3333333	0	0	3192	178251	178251	0.017907333	1	20.33333333	7/22/2008
100	Vineyard/Orchard	8-Jul	2008	Jul	7	1	2008	A	1	5	190	0	0	4249	199219	199219	0.021328287	1	7	7/9/2008
100	Vineyard/Orchard	8-Jul	2008	Jul	7	1	2008	B	1.5	5	203.3333333	0	0	2435	199219	199219	0.01222273	1	20.33333333	7/22/2008
0	Unsuitable	9-Jul	2009	Jul	7	1	2009	A	1	5	189.3333333	0	0	23890	298218	298218	0.080109182	1	7.333333333	7/9/2009
0	Unsuitable	9-Jul	2009	Jul	7	1	2009	B	1.5	5	205.3333333	0	0	25950	298218	298218	0.08701688	1	23.33333333	7/25/2009
1	Grass/Pasture	9-Jul	2009	Jul	7	1	2009	A	1	5	189.3333333	0	0	2704	548137	548137	0.004933073	1	7.333333333	7/9/2009
1	Grass/Pasture	9-Jul	2009	Jul	7	1	2009	B	1.5	5	205.3333333	0	0	3285	548137	548137	0.005993027	1	23.33333333	7/25/2009
3	Corn	9-Jul	2009	Jul	7	1	2009	A	1	5	189.3333333	0	0	849	32904	32904	0.025802334	1	7.333333333	7/9/2009
3	Corn	9-Jul	2009	Jul	7	1	2009	B	1.5	5	205.3333333	0	0	259	32904	32904	0.007871383	1	23.33333333	7/25/2009
5	Field Crop	9-Jul	2009	Jul	7	1	2009	A	1	5	189.3333333	0	0	7922	238654	238654	0.033194499	1	7.333333333	7/9/2009
5	Field Crop	9-Jul	2009	Jul	7	1	2009	B	1.5	5	205.3333333	0	0	9975	238654	238654	0.041796911	1	23.33333333	7/25/2009
7	Grains	9-Jul	2009	Jul	7	1	2009	A	1	5	189.3333333	0	0	1289	121453	121453	0.010613159	1	7.333333333	7/9/2009
7	Grains	9-Jul	2009	Jul	7	1	2009	B	1.5	5	205.3333333	0	0	2771	121453	121453	0.02281541	1	23.33333333	7/25/2009
11	Alfalfa	9-Jul	2009	Jul	7	1	2009	A	1	5	189.3333333	0	0	1300	302899	302899	0.00429186	1	7.333333333	7/9/2009
11	Alfalfa	9-Jul	2009	Jul	7	1	2009	B	1.5	5	205.3333333	0	0	2859	302899	302899	0.00943879	1	23.33333333	7/25/2009
12	Rice	9-Jul	2009	Jul	7	1	2009	A	1	5	189.3333333	0	0	3000	100990	100990	0.029705911	1	7.333333333	7/9/2009
12	Rice	9-Jul	2009	Jul	7	1	2009	B	1.5	5	205.3333333	0	0	1021	100990	100990	0.010109912	1	23.33333333	7/25/2009
13	Row Crop	9-Jul	2009	Jul	7	1	2009	A	1	5	189.3333333	0	0	472	73457	73457	0.006425528	1	7.333333333	7/9/2009
13	Row Crop	9-Jul	2009	Jul	7	1	2009	B	1.5	5	205.3333333	0	0	1157	73457	73457	0.015750711	1	23.33333333	7/25/2009
99	Suitable-unassigned	9-Jul	2009	Jul	7	1	2009	A	1	5	189.3333333	0	0	2186	178251	178251	0.012263606	1	7.333333333	7/9/2009
99	Suitable-unassigned	9-Jul	2009	Jul	7	1	2009	B	1.5	5	205.3333333	0	0	3397	178251	178251	0.019057397	1	23.33333333	7/25/2009
100	Vineyard/Orchard	9-Jul	2009	Jul	7	1	2009	A	1	5	189.3333333	0	0	1092	199219	199219	0.005481405	1	7.333333333	7/9/2009
100	Vineyard/Orchard	9-Jul	2009	Jul	7	1	2009	B	1.5	5	205.3333333	0	0	2272	199219	199219	0.011404535	1	23.33333333	7/25/2009
0	Unsuitable	10-Jul	2010	Jul	7	1	2010	A	1	5	192.3333333	0	0	127	4840	298218	0.026239669	0.016229738	10.33333333	7/12/2010
0	Unsuitable	10-Jul	2010	Jul	7	1	2010	B	1.5	5	208.3333333	0	0	25428	298218	298218	0.085266483	1	26.33333333	7/28/2010
1	Grass/Pasture	10-Jul	2010	Jul	7	1	2010	A	1	5	192.3333333	0	0	993	79995	548137	0.012413276	0.145939792	10.33333333	7/12/2010
1	Grass/Pasture	10-Jul	2010	Jul	7	1	2010	B	1.5	5	208.3333333	0	0	4286	548137	548137	0.007819213	1	26.33333333	7/28/2010
3	Corn	10-Jul	2010	Jul	7	1	2010	B	1.5	5	208.3333333	0	0	144	32904	32904	0.004376368	1	26.33333333	7/28/2010
5	Field Crop	10-Jul	2010	Jul	7	1	2010	A	1	5	192.3333333	0	0	25	86	238654	0.290697674	0.000360354	10.33333333	7/12/2010
5	Field Crop	10-Jul	2010	Jul	7	1	2010	B	1.5	5	208.3333333	0	0	9813	238654	238654	0.041118104	1	26.33333333	7/28/2010
7	Grains	10-Jul	2010	Jul	7	1	2010	A	1	5	192.3333333	0	0	650	4620	121453	0.140692641	0.038039406	10.33333333	7/12/2010
7	Grains	10-Jul	2010	Jul	7	1	2010	B	1.5	5	208.3333333	0	0	3227	121453	121453	0.026569949	1	26.33333333	7/28/2010
11	Alfalfa	10-Jul	2010	Jul	7	1	2010	B	1.5	5	208.3333333	0	0	3671	302899	302899	0.012119551	1	26.33333333	7/28/2010
12	Rice	10-Jul	2010	Jul	7	1	2010	B	1.5	5	208.3333333	0	0	2096	100990	100990	0.02075453	1	26.33333333	7/28/2010
13	Row Crop	10-Jul	2010	Jul	7	1	2010	B	1.5	5	208.3333333	0	0	1104	73457	73457	0.015029201	1	26.33333333	7/28/2010
99	Suitable-unassigned	10-Jul	2010	Jul	7	1	2010	A	1	5	192.3333333	0	0	96	1116	178251	0.086021505	0.006260834	10.33333333	7/12/2010
99	Suitable-unassigned	10-Jul	2010	Jul	7	1	2010	B	1.5	5	208.3333333	0	0	3706	178251	178251	0.020790907	1	26.33333333	7/28/2010
100	Vineyard/Orchard	10-Jul	2010	Jul	7	1	2010	A	1	5	192.3333333	0	0	0	6	199219	0	3.01E-05	10.33333333	7/12/2010
100	Vineyard/Orchard	10-Jul	2010	Jul	7	1	2010	B	1.5	5	208.3333333	0	0	2332	199219	199219	0.011705711	1	26.33333333	7/28/2010
0	Unsuitable	13-Jul	2013	Jul	7	1	2013	B	1.5	5	205.6666667	0	0	17	9072	298218	0.001873898	0.030420699	23.66666667	7/25/2013
1	Grass/Pasture	13-Jul	2013	Jul	7	1	2013	B	1.5	5	205.6666667	0	0	28	151645	548137	0.000184642	0.276655289	23.66666667	7/25/2013
5	Field Crop	13-Jul	2013	Jul	7	1	2013	B	1.5	5	205.6666667	0	0	0	1008	238654	0	0.004223688	23.66666667	7/25/2013
7	Grains	13-Jul	2013	Jul	7	1	2013	B	1.5	5	205.6666667	0	0	31	27789	121453	0.001115549	0.228804558	23.66666667	7/25/2013
11	Alfalfa	13-Jul	2013	Jul	7	1	2013	B	1.5	5	205.6666667	0	0	0	77	302899	0	0.00025421	23.66666667	7/25/2013
99	Suitable-unassigned	13-Jul	2013	Jul	7	1	2013	B	1.5	5	205.6666667	0	0	20	15599	178251	0.001282133	0.087511431	23.66666667	7/25/2013
100	Vineyard/Orchard	13-Jul	2013	Jul	7	1	2013	B	1.5	5	205.6666667	0	0	0	26	199219	0	0.00013051	23.66666667	7/25/2013
0	Unsuitable	14-Jul	2014	Jul	7	1	2014	B	1.5	5	203.3333333	0	0	521	25757	298218	0.020227511	0.086369703	21.33333333	7/23/2014
1	Grass/Pasture	14-Jul	2014	Jul	7	1	2014	B	1.5	5	203.3333333	0	0	529	275270	548137	0.00192175	0.50219197	21.33333333	7/23/2014
3	Corn	14-Jul	2014	Jul	7	1	2014	B	1.5	5	203.3333333	0	0	0	269	32904	0	0.008175298	21.33333333	7/23/2014
5	Field Crop	14-Jul	2014	Jul	7	1	2014	B	1.5	5	203.3333333	0	0	32	2525	238654	0.012673267	0.01058017	21.33333333	7/23/2014
7	Grains	14-Jul	2014	Jul	7	1	2014	B	1.5	5	203.3333333	0	0	2	28934	121453	6.91E-05	0.238232073	21.33333333	7/23/2014
11	Alfalfa	14-Jul	2014	Jul	7	1	2014	B	1.5	5	203.3333333	0	0	2	10428	302899	0.000191791	0.034427317	21.33333333	7/23/2014
99	Suitable-unassigned	14-Jul	2014	Jul	7	1	2014	B	1.5	5	203.3333333	0	0	38	20211	178251	0.001880164	0.113385058	21.33333333	7/23/2014
100	Vineyard/Orchard	14-Jul	2014	Jul	7	1	2014	B	1.5	5	203.3333333	0	0	10	1056	199219	0.009469697	0.005300699	21.33333333	7/23/2014
0	Unsuitable	1-Aug	2001	Aug	8	2	2001	B	2.5	5	236.6666667	0	0	25479	298218	298218	0.085437499	1	54.66666667	8/25/2001
1	Grass/Pasture	1-Aug	2001	Aug	8	2	2001	B	2.5	5	236.6666667	0	0	7416	548137	548137	0.013529464	1	54.66666667	8/25/2001
3	Corn	1-Aug	2001	Aug	8	2	2001	B	2.5	5	236.6666667	0	0	582	32904	32904	0.017687819	1	54.66666667	8/25/2001
5	Field Crop	1-Aug	2001	Aug	8	2	2001	B	2.5	5	236.6666667	0	0	11897	238654	238654	0.049850411	1	54.66666667	8/25/2001
7	Grains	1-Aug	2001	Aug	8	2	2001	B	2.5	5	236.6666667	0	0	2233	121453	121453	0.018385713	1	54.66666667	8/25/2001
11	Alfalfa	1-Aug	2001	Aug	8	2	2001	B	2.5	5	236.6666667	0	0	5939	302899	302899	0.019607196	1	54.66666667	8/25/2001
12	Rice	1-Aug	2001	Aug	8	2	2001	B	2.5	5	236.6666667	0	0	3696	100990	100990	0.036597683	1	54.66666667	8/25/2001
13	Row Crop	1-Aug	2001	Aug	8	2	2001	B	2.5	5	236.6666667	0	0	2023	73457	73457	0.027539921	1	54.66666667	8/25/2001
99	Suitable-unassigned	1-Aug	2001	Aug	8	2	2001	B	2.5	5	236.6666667	0	0	5900	178251	178251	0.033099394	1	54.66666667	8/25/2001
100	Vineyard/Orchard	1-Aug	2001	Aug	8	2	2001	B	2.5	5	236.6666667	0	0	4746	199219	199219	0.023823029	1	54.66666667	8/25/2001
0	Unsuitable	2-Aug	2002	Aug	8	2	2002	A	2	5	218.3333333	0	0	24785	297127	298218	0.083415509	0.996341602	36.33333333	8/7/2002
0	Unsuitable	2-Aug	2002	Aug	8	2	2002	B	2.5	5	232.5	0	0	114	9001	298218	0.012665259	0.030182618	50.5	8/21/2002
1	Grass/Pasture	2-Aug	2002	Aug	8	2	2002	A	2	5	218.3333333	0	0	3466	515280	548137	0.00672644	0.940056957	36.33333333	8/7/2002
1	Grass/Pasture	2-Aug	2002	Aug	8	2	2002	B	2.5	5	232.5	0	0	4391	149615	548137	0.029348662	0.272951835	50.5	8/21/2002
3	Corn	2-Aug	2002	Aug	8	2	2002	A	2	5	218.3333333	0	0	419	32904	32904	0.012734014	1	36.33333333	8/7/2002
5	Field Crop	2-Aug	2002	Aug	8	2	2002	A	2	5	218.3333333	0	0	10018	238227	238654	0.042052328	0.998210799	36.33333333	8/7/2002
5	Field Crop	2-Aug	2002	Aug	8	2	2002	B	2.5	5	232.5	0	0	10	1008	238654	0.009920635	0.004223688	50.5	8/21/2002
7	Grains	2-Aug	2002	Aug	8	2	2002	A	2	5	218.3333333	0	0	1722	120152	121453	0.014331846	0.989288037	36.33333333	8/7/2002
7	Grains	2-Aug	2002	Aug	8	2	2002	B	2.5	5	232.5	0	0	2169	27799	121453	0.078024389	0.228886895	50.5	8/21/2002
11	Alfalfa	2-Aug	2002	Aug	8	2	2002	A	2	5	218.3333333	0	0	4380	302832	302899	0.014463465	0.999778804	36.33333333	8/7/2002
11	Alfalfa	2-Aug	2002	Aug	8	2	2002	B	2.5	5	232.5	0	0	0	77	302899	0	0.00025421	50.5	8/21/2002
12	Rice	2-Aug	2002	Aug	8	2	2002	A	2	5	218.3333333	0	0	1427	100990	100990	0.014130112	1	36.33333333	8/7/2002
13	Row Crop	2-Aug	2002	Aug	8	2	2002	A	2	5	218.3333333	0	0	1904	73457	73457	0.025919926	1	36.33333333	8/7/2002
99	Suitable-unassigned	2-Aug	2002	Aug	8	2	2002	A	2	5	218.3333333	0	0	3762	174500	178251	0.021558739	0.97895664	36.33333333	8/7/2002
99	Suitable-unassigned	2-Aug	2002	Aug	8	2	2002	B	2.5	5	232.5	0	0	560	15632	178251	0.035823951	0.087696563	50.5	8/21/2002
100	Vineyard/Orchard	2-Aug	2002	Aug	8	2	2002	A	2	5	218.3333333	0	0	3671	199207	199219	0.018428067	0.999939765	36.33333333	8/7/2002
100	Vineyard/Orchard	2-Aug	2002	Aug	8	2	2002	B	2.5	5	232.5	0	0	0	26	199219	0	0.00013051	50.5	8/21/2002
0	Unsuitable	4-Aug	2004	Aug	8	2	2004	A	2	5	222.5	0	0	28018	296500	298218	0.094495784	0.994239114	39.5	8/10/2004
0	Unsuitable	4-Aug	2004	Aug	8	2	2004	B	2.5	5	238.5	0	0	24616	298218	298218	0.082543643	1	55.5	8/26/2004
1	Grass/Pasture	4-Aug	2004	Aug	8	2	2004	A	2	5	222.5	0	0	9572	504020	548137	0.01899131	0.919514647	39.5	8/10/2004
1	Grass/Pasture	4-Aug	2004	Aug	8	2	2004	B	2.5	5	238.5	0	0	2742	548137	548137	0.005002399	1	55.5	8/26/2004
3	Corn	4-Aug	2004	Aug	8	2	2004	A	2	5	222.5	0	0	1059	32904	32904	0.032184537	1	39.5	8/10/2004
3	Corn	4-Aug	2004	Aug	8	2	2004	B	2.5	5	238.5	0	0	278	32904	32904	0.008448821	1	55.5	8/26/2004
5	Field Crop	4-Aug	2004	Aug	8	2	2004	A	2	5	222.5	0	0	14173	238037	238654	0.059541164	0.997414667	39.5	8/10/2004
5	Field Crop	4-Aug	2004	Aug	8	2	2004	B	2.5	5	238.5	0	0	10222	238654	238654	0.042831882	1	55.5	8/26/2004
7	Grains	4-Aug	2004	Aug	8	2	2004	A	2	5	222.5	0	0	3407	113746	121453	0.029952702	0.936543354	39.5	8/10/2004
7	Grains	4-Aug	2004	Aug	8	2	2004	B	2.5	5	238.5	0	0	1555	121453	121453	0.012803307	1	55.5	8/26/2004
11	Alfalfa	4-Aug	2004	Aug	8	2	2004	A	2	5	222.5	0	0	8213	302822	302899	0.027121543	0.99974579	39.5	8/10/2004
11	Alfalfa	4-Aug	2004	Aug	8	2	2004	B	2.5	5	238.5	0	0	3345	302899	302899	0.011043285	1	55.5	8/26/2004
12	Rice	4-Aug	2004	Aug	8	2	2004	A	2	5	222.5	0	0	3995	100990	100990	0.039558372	1	39.5	8/10/2004
12	Rice	4-Aug	2004	Aug	8	2	2004	B	2.5	5	238.5	0	0	3926	100990	100990	0.038875136	1	55.5	8/26/2004
13	Row Crop	4-Aug	2004	Aug	8	2	2004	A	2	5	222.5	0	0	3085	73457	73457	0.041997359	1	39.5	8/10/2004
13	Row Crop	4-Aug	2004	Aug	8	2	2004	B	2.5	5	238.5	0	0	1907	73457	73457	0.025960766	1	55.5	8/26/2004
99	Suitable-unassigned	4-Aug	2004	Aug	8	2	2004	A	2	5	222.5	0	0	7184	169047	178251	0.042497057	0.948364946	39.5	8/10/2004
99	Suitable-unassigned	4-Aug	2004	Aug	8	2	2004	B	2.5	5	238.5	0	0	3188	178251	178251	0.017884893	1	55.5	8/26/2004
100	Vineyard/Orchard	4-Aug	2004	Aug	8	2	2004	A	2	5	222.5	0	0	5040	199203	199219	0.025300824	0.999919686	39.5	8/10/2004
100	Vineyard/Orchard	4-Aug	2004	Aug	8	2	2004	B	2.5	5	238.5	0	0	2108	199219	199219	0.01058132	1	55.5	8/26/2004
0	Unsuitable	5-Aug	2005	Aug	8	2	2005	B	2.5	5	231.6666667	0	0	10027	242098	298218	0.041417112	0.811815518	49.66666667	8/20/2005
1	Grass/Pasture	5-Aug	2005	Aug	8	2	2005	B	2.5	5	231.6666667	0	0	1679	454777	548137	0.003691919	0.829677617	49.66666667	8/20/2005
3	Corn	5-Aug	2005	Aug	8	2	2005	B	2.5	5	231.6666667	0	0	285	30688	32904	0.009287018	0.932652565	49.66666667	8/20/2005
5	Field Crop	5-Aug	2005	Aug	8	2	2005	B	2.5	5	231.6666667	0	0	5479	156852	238654	0.034931018	0.657235999	49.66666667	8/20/2005
7	Grains	5-Aug	2005	Aug	8	2	2005	B	2.5	5	231.6666667	0	0	1442	91733	121453	0.015719534	0.755296287	49.66666667	8/20/2005
11	Alfalfa	5-Aug	2005	Aug	8	2	2005	B	2.5	5	231.6666667	0	0	4395	284258	302899	0.015461306	0.938458034	49.66666667	8/20/2005
12	Rice	5-Aug	2005	Aug	8	2	2005	B	2.5	5	231.6666667	0	0	832	67355	100990	0.012352461	0.666947222	49.66666667	8/20/2005
13	Row Crop	5-Aug	2005	Aug	8	2	2005	B	2.5	5	231.6666667	0	0	1057	62544	73457	0.016900102	0.851436895	49.66666667	8/20/2005
99	Suitable-unassigned	5-Aug	2005	Aug	8	2	2005	B	2.5	5	231.6666667	0	0	2951	147601	178251	0.019993089	0.828051456	49.66666667	8/20/2005
100	Vineyard/Orchard	5-Aug	2005	Aug	8	2	2005	B	2.5	5	231.6666667	0	0	1981	192537	199219	0.010288931	0.966459022	49.66666667	8/20/2005
0	Unsuitable	6-Aug	2006	Aug	8	2	2006	A	2	5	218.6666667	0	0	26831	298218	298218	0.089971095	1	36.66666667	8/7/2006
0	Unsuitable	6-Aug	2006	Aug	8	2	2006	B	2.5	5	234.6666667	0	0	111	6814	298218	0.016289991	0.022849057	52.66666667	8/23/2006
1	Grass/Pasture	6-Aug	2006	Aug	8	2	2006	A	2	5	218.6666667	0	0	4417	548137	548137	0.008058204	1	36.66666667	8/7/2006
1	Grass/Pasture	6-Aug	2006	Aug	8	2	2006	B	2.5	5	234.6666667	0	0	1583	96560	548137	0.016393952	0.176160339	52.66666667	8/23/2006
3	Corn	6-Aug	2006	Aug	8	2	2006	A	2	5	218.6666667	0	0	440	32904	32904	0.013372234	1	36.66666667	8/7/2006
5	Field Crop	6-Aug	2006	Aug	8	2	2006	A	2	5	218.6666667	0	0	10063	238654	238654	0.042165646	1	36.66666667	8/7/2006
5	Field Crop	6-Aug	2006	Aug	8	2	2006	B	2.5	5	234.6666667	0	0	12	336	238654	0.035714286	0.001407896	52.66666667	8/23/2006
7	Grains	6-Aug	2006	Aug	8	2	2006	A	2	5	218.6666667	0	0	1424	121453	121453	0.0117247	1	36.66666667	8/7/2006
7	Grains	6-Aug	2006	Aug	8	2	2006	B	2.5	5	234.6666667	0	0	485	12418	121453	0.039056209	0.102245313	52.66666667	8/23/2006
11	Alfalfa	6-Aug	2006	Aug	8	2	2006	A	2	5	218.6666667	0	0	2938	302899	302899	0.009699603	1	36.66666667	8/7/2006
12	Rice	6-Aug	2006	Aug	8	2	2006	A	2	5	218.6666667	0	0	5515	100990	100990	0.054609367	1	36.66666667	8/7/2006
13	Row Crop	6-Aug	2006	Aug	8	2	2006	A	2	5	218.6666667	0	0	741	73457	73457	0.010087534	1	36.66666667	8/7/2006
99	Suitable-unassigned	6-Aug	2006	Aug	8	2	2006	A	2	5	218.6666667	0	0	2691	178251	178251	0.015096689	1	36.66666667	8/7/2006
99	Suitable-unassigned	6-Aug	2006	Aug	8	2	2006	B	2.5	5	234.6666667	0	0	197	3340	178251	0.058982036	0.018737623	52.66666667	8/23/2006
100	Vineyard/Orchard	6-Aug	2006	Aug	8	2	2006	A	2	5	218.6666667	0	0	3164	199219	199219	0.015882019	1	36.66666667	8/7/2006
100	Vineyard/Orchard	6-Aug	2006	Aug	8	2	2006	B	2.5	5	234.6666667	0	0	0	10	199219	0	5.02E-05	52.66666667	8/23/2006
0	Unsuitable	7-Aug	2007	Aug	8	2	2007	B	2.5	5	237.6666667	0	0	24988	298218	298218	0.083791052	1	55.66666667	8/26/2007
1	Grass/Pasture	7-Aug	2007	Aug	8	2	2007	A	2	5	221.6666667	0	0	0	32	548137	0	5.84E-05	39.66666667	8/10/2007
1	Grass/Pasture	7-Aug	2007	Aug	8	2	2007	B	2.5	5	237.6666667	0	0	2321	548137	548137	0.004234343	1	55.66666667	8/26/2007
3	Corn	7-Aug	2007	Aug	8	2	2007	B	2.5	5	237.6666667	0	0	148	32904	32904	0.004497933	1	55.66666667	8/26/2007
5	Field Crop	7-Aug	2007	Aug	8	2	2007	B	2.5	5	237.6666667	0	0	8376	238654	238654	0.035096835	1	55.66666667	8/26/2007
7	Grains	7-Aug	2007	Aug	8	2	2007	B	2.5	5	237.6666667	0	0	1209	121453	121453	0.009954468	1	55.66666667	8/26/2007
11	Alfalfa	7-Aug	2007	Aug	8	2	2007	B	2.5	5	237.6666667	0	0	6415	302899	302899	0.021178677	1	55.66666667	8/26/2007
12	Rice	7-Aug	2007	Aug	8	2	2007	B	2.5	5	237.6666667	0	0	4154	100990	100990	0.041132785	1	55.66666667	8/26/2007
13	Row Crop	7-Aug	2007	Aug	8	2	2007	B	2.5	5	237.6666667	0	0	2855	73457	73457	0.038866276	1	55.66666667	8/26/2007
99	Suitable-unassigned	7-Aug	2007	Aug	8	2	2007	A	2	5	221.6666667	0	0	0	4	178251	0	2.24E-05	39.66666667	8/10/2007
99	Suitable-unassigned	7-Aug	2007	Aug	8	2	2007	B	2.5	5	237.6666667	0	0	3620	178251	178251	0.020308441	1	55.66666667	8/26/2007
100	Vineyard/Orchard	7-Aug	2007	Aug	8	2	2007	B	2.5	5	237.6666667	0	0	2488	199219	199219	0.012488769	1	55.66666667	8/26/2007
0	Unsuitable	8-Aug	2008	Aug	8	2	2008	A	2	5	219.3333333	0	0	82	3366	298218	0.02436126	0.011287045	36.33333333	8/7/2008
0	Unsuitable	8-Aug	2008	Aug	8	2	2008	B	2.5	5	235.3333333	0	0	28080	298218	298218	0.094159306	1	52.33333333	8/23/2008
1	Grass/Pasture	8-Aug	2008	Aug	8	2	2008	A	2	5	219.3333333	0	0	463	56618	548137	0.008177611	0.103291695	36.33333333	8/7/2008
1	Grass/Pasture	8-Aug	2008	Aug	8	2	2008	B	2.5	5	235.3333333	0	0	4151	548137	548137	0.007572924	1	52.33333333	8/23/2008
3	Corn	8-Aug	2008	Aug	8	2	2008	B	2.5	5	235.3333333	0	0	519	32904	32904	0.015773158	1	52.33333333	8/23/2008
5	Field Crop	8-Aug	2008	Aug	8	2	2008	A	2	5	219.3333333	0	0	139	534	238654	0.260299625	0.002237549	36.33333333	8/7/2008
5	Field Crop	8-Aug	2008	Aug	8	2	2008	B	2.5	5	235.3333333	0	0	10916	238654	238654	0.045739858	1	52.33333333	8/23/2008
7	Grains	8-Aug	2008	Aug	8	2	2008	A	2	5	219.3333333	0	0	474	10836	121453	0.043743079	0.089219698	36.33333333	8/7/2008
7	Grains	8-Aug	2008	Aug	8	2	2008	B	2.5	5	235.3333333	0	0	2429	121453	121453	0.019999506	1	52.33333333	8/23/2008
11	Alfalfa	8-Aug	2008	Aug	8	2	2008	A	2	5	219.3333333	0	0	0	77	302899	0	0.00025421	36.33333333	8/7/2008
11	Alfalfa	8-Aug	2008	Aug	8	2	2008	B	2.5	5	235.3333333	0	0	9448	302899	302899	0.031191915	1	52.33333333	8/23/2008
12	Rice	8-Aug	2008	Aug	8	2	2008	B	2.5	5	235.3333333	0	0	5974	100990	100990	0.059154372	1	52.33333333	8/23/2008
13	Row Crop	8-Aug	2008	Aug	8	2	2008	B	2.5	5	235.3333333	0	0	2593	73457	73457	0.035299563	1	52.33333333	8/23/2008
99	Suitable-unassigned	8-Aug	2008	Aug	8	2	2008	A	2	5	219.3333333	0	0	854	5813	178251	0.146912094	0.032611318	36.33333333	8/7/2008
99	Suitable-unassigned	8-Aug	2008	Aug	8	2	2008	B	2.5	5	235.3333333	0	0	6852	178251	178251	0.038440177	1	52.33333333	8/23/2008
100	Vineyard/Orchard	8-Aug	2008	Aug	8	2	2008	A	2	5	219.3333333	0	0	0	20	199219	0	0.000100392	36.33333333	8/7/2008
100	Vineyard/Orchard	8-Aug	2008	Aug	8	2	2008	B	2.5	5	235.3333333	0	0	4656	199219	199219	0.023371265	1	52.33333333	8/23/2008
0	Unsuitable	9-Aug	2009	Aug	8	2	2009	A	2	5	219.5	0	0	27879	298218	298218	0.093485303	1	37.5	8/8/2009
0	Unsuitable	9-Aug	2009	Aug	8	2	2009	B	2.5	5	237.3333333	0	0	25880	298218	298218	0.086782153	1	55.33333333	8/26/2009
1	Grass/Pasture	9-Aug	2009	Aug	8	2	2009	A	2	5	219.5	0	0	6279	548137	548137	0.011455165	1	37.5	8/8/2009
1	Grass/Pasture	9-Aug	2009	Aug	8	2	2009	B	2.5	5	237.3333333	0	0	2431	548137	548137	0.004435023	1	55.33333333	8/26/2009
3	Corn	9-Aug	2009	Aug	8	2	2009	A	2	5	219.5	0	0	733	32904	32904	0.022276927	1	37.5	8/8/2009
3	Corn	9-Aug	2009	Aug	8	2	2009	B	2.5	5	237.3333333	0	0	539	32904	32904	0.016380987	1	55.33333333	8/26/2009
5	Field Crop	9-Aug	2009	Aug	8	2	2009	A	2	5	219.5	0	0	10134	238654	238654	0.042463147	1	37.5	8/8/2009
5	Field Crop	9-Aug	2009	Aug	8	2	2009	B	2.5	5	237.3333333	0	0	9109	238654	238654	0.038168227	1	55.33333333	8/26/2009
7	Grains	9-Aug	2009	Aug	8	2	2009	A	2	5	219.5	0	0	7337	121453	121453	0.0604102	1	37.5	8/8/2009
7	Grains	9-Aug	2009	Aug	8	2	2009	B	2.5	5	237.3333333	0	0	2031	121453	121453	0.016722518	1	55.33333333	8/26/2009
11	Alfalfa	9-Aug	2009	Aug	8	2	2009	A	2	5	219.5	0	0	4003	302899	302899	0.013215626	1	37.5	8/8/2009
11	Alfalfa	9-Aug	2009	Aug	8	2	2009	B	2.5	5	237.3333333	0	0	4275	302899	302899	0.014113615	1	55.33333333	8/26/2009
12	Rice	9-Aug	2009	Aug	8	2	2009	A	2	5	219.5	0	0	1034	100990	100990	0.010238637	1	37.5	8/8/2009
12	Rice	9-Aug	2009	Aug	8	2	2009	B	2.5	5	237.3333333	0	0	1314	100990	100990	0.013011189	1	55.33333333	8/26/2009
13	Row Crop	9-Aug	2009	Aug	8	2	2009	A	2	5	219.5	0	0	1189	73457	73457	0.01618634	1	37.5	8/8/2009
13	Row Crop	9-Aug	2009	Aug	8	2	2009	B	2.5	5	237.3333333	0	0	1588	73457	73457	0.021618089	1	55.33333333	8/26/2009
99	Suitable-unassigned	9-Aug	2009	Aug	8	2	2009	A	2	5	219.5	0	0	5613	178251	178251	0.031489304	1	37.5	8/8/2009
99	Suitable-unassigned	9-Aug	2009	Aug	8	2	2009	B	2.5	5	237.3333333	0	0	4200	178251	178251	0.02356228	1	55.33333333	8/26/2009
100	Vineyard/Orchard	9-Aug	2009	Aug	8	2	2009	A	2	5	219.5	0	0	2558	199219	199219	0.012840141	1	37.5	8/8/2009
100	Vineyard/Orchard	9-Aug	2009	Aug	8	2	2009	B	2.5	5	237.3333333	0	0	2189	199219	199219	0.010987908	1	55.33333333	8/26/2009
0	Unsuitable	10-Aug	2010	Aug	8	2	2010	A	2	5	222.5	0	0	25203	298218	298218	0.084512001	1	40.5	8/11/2010
0	Unsuitable	10-Aug	2010	Aug	8	2	2010	B	2.5	5	235	0	0	22809	298218	298218	0.076484317	1	53	8/24/2010
1	Grass/Pasture	10-Aug	2010	Aug	8	2	2010	A	2	5	222.5	0	0	7562	548137	548137	0.013795821	1	40.5	8/11/2010
1	Grass/Pasture	10-Aug	2010	Aug	8	2	2010	B	2.5	5	235	0	0	1358	548137	548137	0.002477483	1	53	8/24/2010
3	Corn	10-Aug	2010	Aug	8	2	2010	A	2	5	222.5	0	0	484	32904	32904	0.014709458	1	40.5	8/11/2010
3	Corn	10-Aug	2010	Aug	8	2	2010	B	2.5	5	235	0	0	42	32904	32904	0.001276441	1	53	8/24/2010
5	Field Crop	10-Aug	2010	Aug	8	2	2010	A	2	5	222.5	0	0	9428	238654	238654	0.03950489	1	40.5	8/11/2010
5	Field Crop	10-Aug	2010	Aug	8	2	2010	B	2.5	5	235	0	0	5775	238654	238654	0.024198212	1	53	8/24/2010
7	Grains	10-Aug	2010	Aug	8	2	2010	A	2	5	222.5	0	0	4016	121453	121453	0.033066289	1	40.5	8/11/2010
7	Grains	10-Aug	2010	Aug	8	2	2010	B	2.5	5	235	0	0	1327	121453	121453	0.010926037	1	53	8/24/2010
11	Alfalfa	10-Aug	2010	Aug	8	2	2010	A	2	5	222.5	0	0	5567	302899	302899	0.018379064	1	40.5	8/11/2010
11	Alfalfa	10-Aug	2010	Aug	8	2	2010	B	2.5	5	235	0	0	2489	302899	302899	0.008217261	1	53	8/24/2010
12	Rice	10-Aug	2010	Aug	8	2	2010	A	2	5	222.5	0	0	962	100990	100990	0.009525696	1	40.5	8/11/2010
12	Rice	10-Aug	2010	Aug	8	2	2010	B	2.5	5	235	0	0	509	100990	100990	0.005040103	1	53	8/24/2010
13	Row Crop	10-Aug	2010	Aug	8	2	2010	A	2	5	222.5	0	0	1124	73457	73457	0.015301469	1	40.5	8/11/2010
13	Row Crop	10-Aug	2010	Aug	8	2	2010	B	2.5	5	235	0	0	1116	73457	73457	0.015192562	1	53	8/24/2010
99	Suitable-unassigned	10-Aug	2010	Aug	8	2	2010	A	2	5	222.5	0	0	4226	178251	178251	0.023708142	1	40.5	8/11/2010
99	Suitable-unassigned	10-Aug	2010	Aug	8	2	2010	B	2.5	5	235	0	0	2001	178251	178251	0.011225743	1	53	8/24/2010
100	Vineyard/Orchard	10-Aug	2010	Aug	8	2	2010	A	2	5	222.5	0	0	1792	199219	199219	0.008995126	1	40.5	8/11/2010
100	Vineyard/Orchard	10-Aug	2010	Aug	8	2	2010	B	2.5	5	235	0	0	1471	199219	199219	0.007383834	1	53	8/24/2010
0	Unsuitable	11-Aug	2011	Aug	8	2	2011	A	2	5	218.5	0	0	107	4263	298218	0.025099695	0.014294912	36.5	8/7/2011
0	Unsuitable	11-Aug	2011	Aug	8	2	2011	B	2.5	5	232.6666667	0	0	26376	298218	298218	0.088445365	1	50.66666667	8/21/2011
1	Grass/Pasture	11-Aug	2011	Aug	8	2	2011	A	2	5	218.5	0	0	1104	66308	548137	0.016649575	0.120969758	36.5	8/7/2011
1	Grass/Pasture	11-Aug	2011	Aug	8	2	2011	B	2.5	5	232.6666667	0	0	5039	548137	548137	0.009192957	1	50.66666667	8/21/2011
3	Corn	11-Aug	2011	Aug	8	2	2011	B	2.5	5	232.6666667	0	0	246	32904	32904	0.007476295	1	50.66666667	8/21/2011
5	Field Crop	11-Aug	2011	Aug	8	2	2011	A	2	5	218.5	0	0	118	419	238654	0.281622912	0.00175568	36.5	8/7/2011
5	Field Crop	11-Aug	2011	Aug	8	2	2011	B	2.5	5	232.6666667	0	0	9941	238654	238654	0.041654445	1	50.66666667	8/21/2011
7	Grains	11-Aug	2011	Aug	8	2	2011	A	2	5	218.5	0	0	711	12617	121453	0.05635254	0.103883807	36.5	8/7/2011
7	Grains	11-Aug	2011	Aug	8	2	2011	B	2.5	5	232.6666667	0	0	3152	121453	121453	0.025952426	1	50.66666667	8/21/2011
11	Alfalfa	11-Aug	2011	Aug	8	2	2011	A	2	5	218.5	0	0	0	77	302899	0	0.00025421	36.5	8/7/2011
11	Alfalfa	11-Aug	2011	Aug	8	2	2011	B	2.5	5	232.6666667	0	0	6134	302899	302899	0.020250975	1	50.66666667	8/21/2011
12	Rice	11-Aug	2011	Aug	8	2	2011	B	2.5	5	232.6666667	0	0	463	100990	100990	0.004584612	1	50.66666667	8/21/2011
13	Row Crop	11-Aug	2011	Aug	8	2	2011	B	2.5	5	232.6666667	0	0	1187	73457	73457	0.016159113	1	50.66666667	8/21/2011
99	Suitable-unassigned	11-Aug	2011	Aug	8	2	2011	A	2	5	218.5	0	0	3402	8582	178251	0.396411093	0.048145592	36.5	8/7/2011
99	Suitable-unassigned	11-Aug	2011	Aug	8	2	2011	B	2.5	5	232.6666667	0	0	5184	178251	178251	0.029082586	1	50.66666667	8/21/2011
100	Vineyard/Orchard	11-Aug	2011	Aug	8	2	2011	A	2	5	218.5	0	0	0	20	199219	0	0.000100392	36.5	8/7/2011
100	Vineyard/Orchard	11-Aug	2011	Aug	8	2	2011	B	2.5	5	232.6666667	0	0	2916	199219	199219	0.014637158	1	50.66666667	8/21/2011
0	Unsuitable	13-Aug	2013	Aug	8	2	2013	A	2	5	221.6666667	0	0	0	6	298218	0	2.01E-05	39.66666667	8/10/2013
0	Unsuitable	13-Aug	2013	Aug	8	2	2013	B	2.5	5	237.6666667	0	0	8462	255360	298218	0.033137531	0.856286341	55.66666667	8/26/2013
1	Grass/Pasture	13-Aug	2013	Aug	8	2	2013	A	2	5	221.6666667	0	0	0	32	548137	0	5.84E-05	39.66666667	8/10/2013
1	Grass/Pasture	13-Aug	2013	Aug	8	2	2013	B	2.5	5	237.6666667	0	0	1195	485370	548137	0.002462039	0.885490306	55.66666667	8/26/2013
3	Corn	13-Aug	2013	Aug	8	2	2013	B	2.5	5	237.6666667	0	0	15	30103	32904	0.000498289	0.914873572	55.66666667	8/26/2013
5	Field Crop	13-Aug	2013	Aug	8	2	2013	B	2.5	5	237.6666667	0	0	1492	178632	238654	0.008352367	0.748497825	55.66666667	8/26/2013
7	Grains	13-Aug	2013	Aug	8	2	2013	B	2.5	5	237.6666667	0	0	288	114948	121453	0.002505481	0.946440187	55.66666667	8/26/2013
11	Alfalfa	13-Aug	2013	Aug	8	2	2013	B	2.5	5	237.6666667	0	0	239	284847	302899	0.000839047	0.940402576	55.66666667	8/26/2013
12	Rice	13-Aug	2013	Aug	8	2	2013	B	2.5	5	237.6666667	0	0	110	74536	100990	0.001475797	0.738053273	55.66666667	8/26/2013
13	Row Crop	13-Aug	2013	Aug	8	2	2013	B	2.5	5	237.6666667	0	0	1	69778	73457	1.43E-05	0.949916278	55.66666667	8/26/2013
99	Suitable-unassigned	13-Aug	2013	Aug	8	2	2013	B	2.5	5	237.6666667	0	0	415	161645	178251	0.002567354	0.906839232	55.66666667	8/26/2013
100	Vineyard/Orchard	13-Aug	2013	Aug	8	2	2013	B	2.5	5	237.6666667	0	0	188	189047	199219	0.000994462	0.948940613	55.66666667	8/26/2013
0	Unsuitable	1-Sep	2001	Sep	9	3	2001	A	3	5	252.6666667	0	0	25333	298218	298218	0.084947924	1	70.66666667	9/10/2001
1	Grass/Pasture	1-Sep	2001	Sep	9	3	2001	A	3	5	252.6666667	0	0	2402	548137	548137	0.004382116	1	70.66666667	9/10/2001
3	Corn	1-Sep	2001	Sep	9	3	2001	A	3	5	252.6666667	0	0	628	32904	32904	0.019085825	1	70.66666667	9/10/2001
5	Field Crop	1-Sep	2001	Sep	9	3	2001	A	3	5	252.6666667	0	0	12974	238654	238654	0.05436322	1	70.66666667	9/10/2001
7	Grains	1-Sep	2001	Sep	9	3	2001	A	3	5	252.6666667	0	0	3145	121453	121453	0.025894791	1	70.66666667	9/10/2001
11	Alfalfa	1-Sep	2001	Sep	9	3	2001	A	3	5	252.6666667	0	0	6346	302899	302899	0.020950878	1	70.66666667	9/10/2001
12	Rice	1-Sep	2001	Sep	9	3	2001	A	3	5	252.6666667	0	0	5039	100990	100990	0.049896029	1	70.66666667	9/10/2001
13	Row Crop	1-Sep	2001	Sep	9	3	2001	A	3	5	252.6666667	0	0	3454	73457	73457	0.047020706	1	70.66666667	9/10/2001
99	Suitable-unassigned	1-Sep	2001	Sep	9	3	2001	A	3	5	252.6666667	0	0	6930	178251	178251	0.038877762	1	70.66666667	9/10/2001
100	Vineyard/Orchard	1-Sep	2001	Sep	9	3	2001	A	3	5	252.6666667	0	0	5068	199219	199219	0.025439341	1	70.66666667	9/10/2001
0	Unsuitable	2-Sep	2002	Sep	9	3	2002	A	3	5	250.3333333	0	0	23624	298218	298218	0.079217217	1	68.33333333	9/8/2002
0	Unsuitable	2-Sep	2002	Sep	9	3	2002	B	3.5	5	266.3333333	0	0	27737	298218	298218	0.093009141	1	84.33333333	9/24/2002
1	Grass/Pasture	2-Sep	2002	Sep	9	3	2002	A	3	5	250.3333333	0	0	3465	548137	548137	0.006321412	1	68.33333333	9/8/2002
1	Grass/Pasture	2-Sep	2002	Sep	9	3	2002	B	3.5	5	266.3333333	0	0	3813	548137	548137	0.00695629	1	84.33333333	9/24/2002
3	Corn	2-Sep	2002	Sep	9	3	2002	A	3	5	250.3333333	0	0	296	32904	32904	0.008995867	1	68.33333333	9/8/2002
3	Corn	2-Sep	2002	Sep	9	3	2002	B	3.5	5	266.3333333	0	0	1269	32904	32904	0.03856674	1	84.33333333	9/24/2002
5	Field Crop	2-Sep	2002	Sep	9	3	2002	A	3	5	250.3333333	0	0	9223	238654	238654	0.038645906	1	68.33333333	9/8/2002
5	Field Crop	2-Sep	2002	Sep	9	3	2002	B	3.5	5	266.3333333	0	0	17685	238654	238654	0.074103095	1	84.33333333	9/24/2002
7	Grains	2-Sep	2002	Sep	9	3	2002	A	3	5	250.3333333	0	0	1831	121453	121453	0.015075791	1	68.33333333	9/8/2002
7	Grains	2-Sep	2002	Sep	9	3	2002	B	3.5	5	266.3333333	0	0	2403	121453	121453	0.019785431	1	84.33333333	9/24/2002
11	Alfalfa	2-Sep	2002	Sep	9	3	2002	A	3	5	250.3333333	0	0	4418	302899	302899	0.01458572	1	68.33333333	9/8/2002
11	Alfalfa	2-Sep	2002	Sep	9	3	2002	B	3.5	5	266.3333333	0	0	8978	302899	302899	0.029640243	1	84.33333333	9/24/2002
12	Rice	2-Sep	2002	Sep	9	3	2002	A	3	5	250.3333333	0	0	3594	100990	100990	0.035587682	1	68.33333333	9/8/2002
12	Rice	2-Sep	2002	Sep	9	3	2002	B	3.5	5	266.3333333	0	0	4499	100990	100990	0.044548965	1	84.33333333	9/24/2002
13	Row Crop	2-Sep	2002	Sep	9	3	2002	A	3	5	250.3333333	0	0	2163	73457	73457	0.029445798	1	68.33333333	9/8/2002
13	Row Crop	2-Sep	2002	Sep	9	3	2002	B	3.5	5	266.3333333	0	0	3763	73457	73457	0.051227249	1	84.33333333	9/24/2002
99	Suitable-unassigned	2-Sep	2002	Sep	9	3	2002	A	3	5	250.3333333	0	0	3561	178251	178251	0.019977448	1	68.33333333	9/8/2002
99	Suitable-unassigned	2-Sep	2002	Sep	9	3	2002	B	3.5	5	266.3333333	0	0	5886	178251	178251	0.033020853	1	84.33333333	9/24/2002
100	Vineyard/Orchard	2-Sep	2002	Sep	9	3	2002	A	3	5	250.3333333	0	0	3422	199219	199219	0.017177076	1	68.33333333	9/8/2002
100	Vineyard/Orchard	2-Sep	2002	Sep	9	3	2002	B	3.5	5	266.3333333	0	0	4428	199219	199219	0.022226796	1	84.33333333	9/24/2002
0	Unsuitable	4-Sep	2004	Sep	9	3	2004	A	3	5	251	0	0	27	9001	298218	0.002999667	0.030182618	68	9/8/2004
1	Grass/Pasture	4-Sep	2004	Sep	9	3	2004	A	3	5	251	0	0	500	149615	548137	0.003341911	0.272951835	68	9/8/2004
5	Field Crop	4-Sep	2004	Sep	9	3	2004	A	3	5	251	0	0	20	1008	238654	0.01984127	0.004223688	68	9/8/2004
7	Grains	4-Sep	2004	Sep	9	3	2004	A	3	5	251	0	0	193	27799	121453	0.006942696	0.228886895	68	9/8/2004
11	Alfalfa	4-Sep	2004	Sep	9	3	2004	A	3	5	251	0	0	0	77	302899	0	0.00025421	68	9/8/2004
99	Suitable-unassigned	4-Sep	2004	Sep	9	3	2004	A	3	5	251	0	0	225	15632	178251	0.014393552	0.087696563	68	9/8/2004
100	Vineyard/Orchard	4-Sep	2004	Sep	9	3	2004	A	3	5	251	0	0	0	26	199219	0	0.00013051	68	9/8/2004
0	Unsuitable	5-Sep	2005	Sep	9	3	2005	B	3.5	5	263.6666667	0	0	21238	258857	298218	0.082045299	0.868012662	81.66666667	9/21/2005
1	Grass/Pasture	5-Sep	2005	Sep	9	3	2005	B	3.5	5	263.6666667	0	0	959	472008	548137	0.002031745	0.861113189	81.66666667	9/21/2005
3	Corn	5-Sep	2005	Sep	9	3	2005	B	3.5	5	263.6666667	0	0	147	29861	32904	0.004922809	0.907518843	81.66666667	9/21/2005
5	Field Crop	5-Sep	2005	Sep	9	3	2005	B	3.5	5	263.6666667	0	0	5357	213483	238654	0.025093333	0.894529319	81.66666667	9/21/2005
7	Grains	5-Sep	2005	Sep	9	3	2005	B	3.5	5	263.6666667	0	0	443	105849	121453	0.004185207	0.871522317	81.66666667	9/21/2005
11	Alfalfa	5-Sep	2005	Sep	9	3	2005	B	3.5	5	263.6666667	0	0	3633	258997	302899	0.01402719	0.855060598	81.66666667	9/21/2005
12	Rice	5-Sep	2005	Sep	9	3	2005	B	3.5	5	263.6666667	0	0	5586	91421	100990	0.061101935	0.905248044	81.66666667	9/21/2005
13	Row Crop	5-Sep	2005	Sep	9	3	2005	B	3.5	5	263.6666667	0	0	1221	59695	73457	0.020453974	0.8126523	81.66666667	9/21/2005
99	Suitable-unassigned	5-Sep	2005	Sep	9	3	2005	B	3.5	5	263.6666667	0	0	2132	147698	178251	0.01443486	0.828595632	81.66666667	9/21/2005
100	Vineyard/Orchard	5-Sep	2005	Sep	9	3	2005	B	3.5	5	263.6666667	0	0	1140	149423	199219	0.007629348	0.750043922	81.66666667	9/21/2005
0	Unsuitable	6-Sep	2006	Sep	9	3	2006	A	3	5	250.6666667	0	0	16594	209446	298218	0.079228059	0.702325145	68.66666667	9/8/2006
0	Unsuitable	6-Sep	2006	Sep	9	3	2006	B	3.5	5	266.6666667	0	0	20282	253599	298218	0.079976656	0.850381265	84.66666667	9/24/2006
1	Grass/Pasture	6-Sep	2006	Sep	9	3	2006	A	3	5	250.6666667	0	0	3920	247670	548137	0.015827512	0.451839595	68.66666667	9/8/2006
1	Grass/Pasture	6-Sep	2006	Sep	9	3	2006	B	3.5	5	266.6666667	0	0	2940	512391	548137	0.005737806	0.934786376	84.66666667	9/24/2006
3	Corn	6-Sep	2006	Sep	9	3	2006	A	3	5	250.6666667	0	0	387	22521	32904	0.017183962	0.68444566	68.66666667	9/8/2006
3	Corn	6-Sep	2006	Sep	9	3	2006	B	3.5	5	266.6666667	0	0	1036	23735	32904	0.04364862	0.72134087	84.66666667	9/24/2006
5	Field Crop	6-Sep	2006	Sep	9	3	2006	A	3	5	250.6666667	0	0	8453	201629	238654	0.041923533	0.844859085	68.66666667	9/8/2006
5	Field Crop	6-Sep	2006	Sep	9	3	2006	B	3.5	5	266.6666667	0	0	9855	174754	238654	0.056393559	0.73224836	84.66666667	9/24/2006
7	Grains	6-Sep	2006	Sep	9	3	2006	A	3	5	250.6666667	0	0	4251	109529	121453	0.038811639	0.901822104	68.66666667	9/8/2006
7	Grains	6-Sep	2006	Sep	9	3	2006	B	3.5	5	266.6666667	0	0	4755	108975	121453	0.043633861	0.897260669	84.66666667	9/24/2006
11	Alfalfa	6-Sep	2006	Sep	9	3	2006	A	3	5	250.6666667	0	0	2709	203846	302899	0.013289444	0.672983404	68.66666667	9/8/2006
11	Alfalfa	6-Sep	2006	Sep	9	3	2006	B	3.5	5	266.6666667	0	0	12236	284320	302899	0.043036016	0.938662723	84.66666667	9/24/2006
12	Rice	6-Sep	2006	Sep	9	3	2006	A	3	5	250.6666667	0	0	3259	99785	100990	0.032660219	0.988068126	68.66666667	9/8/2006
12	Rice	6-Sep	2006	Sep	9	3	2006	B	3.5	5	266.6666667	0	0	2287	37843	100990	0.060433898	0.374720269	84.66666667	9/24/2006
13	Row Crop	6-Sep	2006	Sep	9	3	2006	A	3	5	250.6666667	0	0	2645	71247	73457	0.03712437	0.969914372	68.66666667	9/8/2006
13	Row Crop	6-Sep	2006	Sep	9	3	2006	B	3.5	5	266.6666667	0	0	7471	63548	73457	0.117564676	0.865104755	84.66666667	9/24/2006
99	Suitable-unassigned	6-Sep	2006	Sep	9	3	2006	A	3	5	250.6666667	0	0	4453	141583	178251	0.031451516	0.794290074	68.66666667	9/8/2006
99	Suitable-unassigned	6-Sep	2006	Sep	9	3	2006	B	3.5	5	266.6666667	0	0	8242	148188	178251	0.055618539	0.831344565	84.66666667	9/24/2006
100	Vineyard/Orchard	6-Sep	2006	Sep	9	3	2006	A	3	5	250.6666667	0	0	3397	182310	199219	0.018633097	0.915123557	68.66666667	9/8/2006
100	Vineyard/Orchard	6-Sep	2006	Sep	9	3	2006	B	3.5	5	266.6666667	0	0	5935	173995	199219	0.034110176	0.873385571	84.66666667	9/24/2006
0	Unsuitable	7-Sep	2007	Sep	9	3	2007	A	3	5	251	0	0	24379	297531	298218	0.08193768	0.997696316	69	9/9/2007
1	Grass/Pasture	7-Sep	2007	Sep	9	3	2007	A	3	5	251	0	0	6944	527915	548137	0.013153633	0.963107763	69	9/9/2007
3	Corn	7-Sep	2007	Sep	9	3	2007	A	3	5	251	0	0	284	32904	32904	0.008631169	1	69	9/9/2007
5	Field Crop	7-Sep	2007	Sep	9	3	2007	A	3	5	251	0	0	6512	238482	238654	0.027306044	0.999279291	69	9/9/2007
7	Grains	7-Sep	2007	Sep	9	3	2007	A	3	5	251	0	0	4365	120699	121453	0.036164343	0.993791837	69	9/9/2007
11	Alfalfa	7-Sep	2007	Sep	9	3	2007	A	3	5	251	0	0	4504	302899	302899	0.014869643	1	69	9/9/2007
12	Rice	7-Sep	2007	Sep	9	3	2007	A	3	5	251	0	0	3128	100990	100990	0.030973364	1	69	9/9/2007
13	Row Crop	7-Sep	2007	Sep	9	3	2007	A	3	5	251	0	0	941	73457	73457	0.012810216	1	69	9/9/2007
99	Suitable-unassigned	7-Sep	2007	Sep	9	3	2007	A	3	5	251	0	0	4683	175766	178251	0.026643378	0.986058984	69	9/9/2007
100	Vineyard/Orchard	7-Sep	2007	Sep	9	3	2007	A	3	5	251	0	0	1427	199213	199219	0.007163187	0.999969882	69	9/9/2007
0	Unsuitable	8-Sep	2008	Sep	9	3	2008	A	3	5	251.3333333	0	0	29413	298218	298218	0.098629191	1	68.33333333	9/8/2008
0	Unsuitable	8-Sep	2008	Sep	9	3	2008	B	3.5	5	267.3333333	0	0	13	9001	298218	0.001444284	0.030182618	84.33333333	9/24/2008
1	Grass/Pasture	8-Sep	2008	Sep	9	3	2008	A	3	5	251.3333333	0	0	7300	548137	548137	0.013317838	1	68.33333333	9/8/2008
1	Grass/Pasture	8-Sep	2008	Sep	9	3	2008	B	3.5	5	267.3333333	0	0	148	149615	548137	0.000989206	0.272951835	84.33333333	9/24/2008
[truncated: 15,434 more rows]
